# Supplementary material for: Synthesis of vinyl, alkyl-substituted chiral acrylates via Krische iridium complex-catalysed allylic phosphonation
Source: Royal Society of Chemistry journal article supplement (doi:10.1039/d5cc00072f), 2025-01-01

*Supporting Information*

**Synthesis of vinyl, alkyl-substituted chiral acrylates via Krische  
iridium complex-catalysed allylic phosphonation**

Yuan-Yuan Zhang,<sup>1,2,‡</sup> Yi Deng,<sup>1,2,‡</sup> Kun Wei,<sup>1</sup> and Yu-Rong Yang<sup>\*,1</sup>

<sup>1</sup>Key Laboratory of Phytochemistry and Natural Medicines, Kunming Institute of Botany, Chinese  
Academy of Sciences, Kunming 650201, China;

<sup>2</sup>University of Chinese Academy of Sciences, Beijing 100049, China.

[yangyurong@mail.kib.ac.cn](mailto:yangyurong@mail.kib.ac.cn)

**Table of Contents**

|                                                                        |            |
|------------------------------------------------------------------------|------------|
| <b>General information</b> .....                                       | <b>S1</b>  |
| <b>Optimization of reaction conditions</b> .....                       | <b>S2</b>  |
| <b>Synthesis and characterization of substrates and products</b> ..... | <b>S5</b>  |
| <b>Derivatizations of products</b> .....                               | <b>S19</b> |
| <b>References</b> .....                                                | <b>S25</b> |
| <b>HPLC data</b> .....                                                 | <b>S26</b> |
| <b>NMR spectra</b> .....                                               | <b>S48</b> |

## General information

Unless otherwise stated, all oxygen- or moisture-sensitive reactions were conducted in flame-dried glassware in an atmosphere of nitrogen. All solvents were purified and dried according to standard methods prior to use. The corresponding ligands (*S*)-Ir-Ligand and allylic acetate were prepared according to the reported procedure<sup>[1][2]</sup>. Trimethyl phosphonoacetate was purchased from commercial sources and was used without further purification.

Chromatographic purification of products was accomplished using forced-flow chromatography on 200-300 mesh silica gel. The TLC glass plates were performed on 0.20 mm or 1.0 mm (preparative) silica gel GF254 plates. Visualization was performed using ultraviolet light (254 nm) and potassium permanganate (KMnO<sub>4</sub>) in water.

<sup>1</sup>H NMR and <sup>13</sup>C NMR spectra were acquired on Bruker Avance III-400 spectrometer and Bruker Avance III-600MHz spectrometer (Bruker Corp., Germany); TMS was used as an internal standard. Chemical shifts were given in parts per million (ppm) with reference to residual solvent signals [<sup>1</sup>H NMR: CDCl<sub>3</sub> (7.26); <sup>13</sup>C NMR: CDCl<sub>3</sub> (77.0)]. Peak multiplicities were recorded as follows: s: singlet, d: doublet, t: triplet, q: quartet, m: multiplet or unresolved, br: broad singlet. Infrared (IR) spectra were recorded on a Nicolet iS10 Fourier transform infrared (FT-IR) spectrometer (Thermo Scientific, United States) with KBr pellets and ATR ITX-DIAMOND. High-resolution mass spectral (HRMS) data were obtained at the mass spectrometry service operated at Agilent 6540 Q-TOF LC/MS spectrometer for electrospray ionization (ESI), electron Ionization (EI) and were reported as (*m/z*). Optical rotations were measured on an Automatic Polarimeter APVI-6W 91058. HPLC analysis was performed on an Agilent 1260 series system using Daicel chiralpak AD-H, OD-H, OJ-H, OC-H, and IC with *n*-hexane and *i*-PrOH as solvents.

## Optimization of reaction conditions

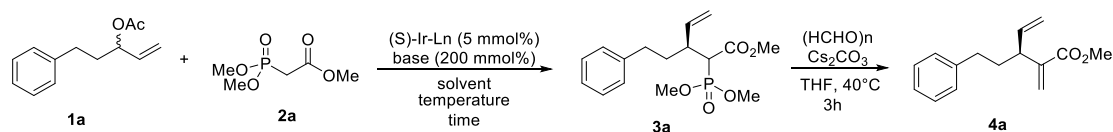

**General procedure:** A pressure tube equipped with a magnetic stir bar was charged with (S)-Ir-Ligand (5 mmol%), base (200 mmol%), then dried solvent (0.5 M), trimethyl phosphonoacetate **2a** (200 mmol%) and corresponding allylic substrates **1a** (100 mmol%) were added. The tube was purged with argon for 1 minute and sealed with a PTFE-lined cap. Then, the tube was placed in an oil bath at the indicated temperature and stirred for the indicated period. After cooling to ambient temperature, the crude reaction mixture was directly subjected to flash column chromatography to obtain intermediate **3a**. The  $\alpha$ -allylic phosphonate **3a** was then taken in a round-bottom flask and dissolved in THF (0.1 M), followed by the sequential addition of Cs<sub>2</sub>CO<sub>3</sub> (3.0 equiv) and paraformaldehyde (6.0 equiv) under open-air. The resulting mixture was then stirred at 40 °C until TLC revealed the complete consumption of **3a** (~3 h). Then, the crude mixture was directly purified by silica-gel flash column chromatography to obtain **4a**.

### 1. Optimization of solvent

**Standard conditions:** Following general procedure, allylic acetate (100 mmol%), trimethyl phosphonoacetate (200 mmol%), (S)-Ir-tol-BINAP (5 mmol%), Cs<sub>2</sub>CO<sub>3</sub> (200 mmol%), solvent (0.5 M), 50 °C, 24 h.

| entry | solvent | yield(%) <sup>a</sup> | ee(%) <sup>b</sup> |
|-------|---------|-----------------------|--------------------|
| 1     | DME     | 67                    | 95                 |
| 2     | THF     | 32                    | 90                 |
| 3     | Dioxane | 5                     | 93                 |

<sup>a</sup>Two-step yield. <sup>b</sup>The ee value was determined by HPLC on the Daicel chiralpak OJ-H.

### 2. Optimization of base

**Standard conditions:** Following the general procedure, allylic acetate (100 mmol%), trimethyl phosphonoacetate (200 mmol%), (S)-Ir-Tol-BINAP (5 mmol%), base (200 mmol%), DME (0.5 M), 50 °C, 24 h.

| entry          | base                            | T(°C) | ligand           | yield(%) <sup>a</sup> | ee(%) <sup>b</sup> |
|----------------|---------------------------------|-------|------------------|-----------------------|--------------------|
| 1              | Cs <sub>2</sub> CO <sub>3</sub> | 50    | (S)-Ir-tol-BINAP | 67                    | 95                 |
| 2 <sup>c</sup> | Cs <sub>2</sub> CO <sub>3</sub> | 50    | (S)-Ir-tol-BINAP | 52                    | 96                 |
| 3 <sup>d</sup> | Cs <sub>2</sub> CO <sub>3</sub> | 50    | (S)-Ir-tol-BINAP | 62                    | 96                 |
| 4              | K <sub>2</sub> CO <sub>3</sub>  | 50    | (S)-Ir-tol-BINAP | n.r.                  | n.d.               |
| 5              | K <sub>3</sub> PO <sub>4</sub>  | 50    | (S)-Ir-tol-BINAP | 48                    | 96                 |
| 6 <sup>e</sup> | <i>t</i> -BuONa                 | 50    | (S)-Ir-tol-BINAP | 28                    | n.d.               |
| 7              | NaOAc                           | 50    | (S)-Ir-tol-BINAP | n.r.                  | n.d.               |

<sup>a</sup>Two-step yield. <sup>b</sup>The *ee* value was determined by HPLC on the Daicel chiralpak OJ-H. <sup>c</sup>Cs<sub>2</sub>CO<sub>3</sub> was 1.5 eq. <sup>d</sup>Cs<sub>2</sub>CO<sub>3</sub> was 1.5 eq, and the reaction time was 36 h. <sup>e</sup>The reaction time was 18 h, and the yield was only the first step of Ir-catalyzed allylic alkylation.

### 3. Optimization of ligand

**Standard conditions:** Following the general procedure, allylic acetate (100 mmol%), trimethyl phosphonoacetate (200 mmol%), (*S*)-Ir-Ligand (5 mmol%), Cs<sub>2</sub>CO<sub>3</sub> (200 mmol%), DME (0.5 M), 50 °C, 40 h.

| entry | ligand                         | yield(%) <sup>a</sup> | <i>ee</i> (%) <sup>b</sup> |
|-------|--------------------------------|-----------------------|----------------------------|
| 1     | ( <i>S</i> )-Ir-tol-BINAP      | 61                    | 94                         |
| 2     | ( <i>S</i> )-Ir-Cl, OMe-BIPHEP | 50                    | 86                         |
| 3     | ( <i>S</i> )-Ir-DM-BINAP       | 58                    | 85                         |
| 4     | ( <i>S</i> )-Ir-SEGPPOS        | 39                    | 87                         |
| 5     | ( <i>S</i> )-Ir-tol-SDP        | 19                    | 21                         |
| 6     | ( <i>S</i> )-Ir-DM-SEGPPOS     | 20                    | 70                         |

<sup>a</sup>Two-step yield. <sup>b</sup>The *ee* value was determined by HPLC on the Daicel chiralpak OJ-H.

### 4. Optimization of temperature

**Standard conditions:** Following general procedure, allylic acetate (100 mmol%), trimethyl phosphonoacetate (200 mmol%), (*S*)-Ir-tol-BINAP (5 mmol%), Cs<sub>2</sub>CO<sub>3</sub> (200 mmol%), DME (0.5 M), 40 h.

| entry | T(°C) | yield(%) <sup>a</sup> | <i>ee</i> (%) <sup>b</sup> |
|-------|-------|-----------------------|----------------------------|
| 1     | 70    | 41                    | 91                         |
| 2     | 50    | 61                    | 94                         |
| 3     | 30    | 66                    | 97                         |

<sup>a</sup>Two-step yield. <sup>b</sup>The *ee* value was determined by HPLC on the Daicel chiralpak OJ-H.

### 5. Optimization of reaction time

**Standard conditions:** Following general procedure, allylic acetate (100 mmol%), trimethyl phosphonoacetate (200 mmol%), (*S*)-Ir-tol-BINAP (5 mmol%), Cs<sub>2</sub>CO<sub>3</sub> (200 mmol%), DME (0.5 M), 50 °C.

| entry          | Time(h) | yield(%) <sup>a</sup> | <i>ee</i> (%) <sup>b</sup> |
|----------------|---------|-----------------------|----------------------------|
| 1              | 18      | 49                    | 95                         |
| 2              | 24      | 67                    | 95                         |
| 3              | 30      | 67                    | 95                         |
| 4              | 40      | 61                    | 94                         |
| 5 <sup>c</sup> | 60      | 90                    | 96                         |

<sup>a</sup>Two-step yield. <sup>b</sup>The *ee* value was determined by HPLC on the Daicel chiralpak OJ-H. <sup>c</sup>The reaction temperature was 30 °C.

## 6. The scale of reaction

**Standard conditions:** Following general procedure, allylic acetate (100 mmol%), trimethyl phosphonoacetate (200 mmol%), (*S*)-Ir-tol-BINAP (5 mmol%), Cs<sub>2</sub>CO<sub>3</sub> (200 mmol%), DME (0.5 M), 30 °C, 60 h.

| entry | Scale(mmol) | yield(%) <sup>a</sup> | ee(%) <sup>b</sup> |
|-------|-------------|-----------------------|--------------------|
| 1     | 0.1         | 90                    | 96                 |
| 2     | 0.5         | 87                    | 96                 |
| 3     | 2.0         | 85                    | 96                 |

<sup>a</sup>Two-step yield. <sup>b</sup>The *ee* value was determined by HPLC on the Daicel chiralpak OJ-H.

## Synthesis and characterization of substrates and products

### General procedure for preparation of allylic acetates<sup>[1]</sup>

Vinyl magnesium bromide (1.0 M in THF, 3.6 mmol) was added dropwise to a solution of the corresponding aldehyde (3.0 mmol) in dry THF at 0 °C. The mixture was stirred at room temperature for 10 minutes, at which point triethylamine (6.0 mmol) and acetic anhydride (4.5 mmol) were added, and the reaction was stirred vigorously for 30 minutes. After water was added, the organic layer was extracted with diethyl ether. The combined organic layers were washed with 1N HCl and brine dried over Na<sub>2</sub>SO<sub>4</sub>, concentrated in vacuo, and then purified by silica gel column chromatography to afford the corresponding allylic acetates.

### Characterization of allylic acetates

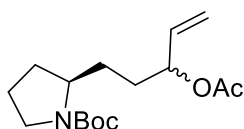

**1e**

$R_f$  = 0.26 (petroleum ether/ethyl acetate 18/1). <sup>1</sup>H NMR (400 MHz, CD<sub>3</sub>OD contains 2% pyridine):  $\delta$  5.81 (ddd,  $J$  = 17.1, 10.5, 6.4 Hz, 1H), 5.41-5.05 (m, 3H), 3.52-3.15 (m, 3H), 2.04 (s, 3H), 2.00-1.54 (m, 8H), 1.45 (s, 9H) ppm. <sup>13</sup>C NMR (100 MHz, CD<sub>3</sub>OD contains 2% pyridine):  $\delta$  170.5, 155.0, 136.4, 115.6, 79.4, 74.7, 74.6, 45.9, 30.6, 30.2, 27.5 (overlap), 23.2, 22.6, 19.8 ppm. HRMS (ESI<sup>+</sup>):  $m/z$  calcd for C<sub>16</sub>H<sub>27</sub>NO<sub>4</sub>Na [M+Na]<sup>+</sup> 320.1832, found 320.1832.

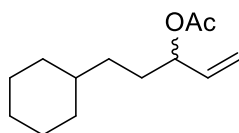

**1f**

$R_f$  = 0.27 (petroleum ether/ethyl acetate 50/1). <sup>1</sup>H NMR (400 MHz, CDCl<sub>3</sub>):  $\delta$  5.75 (ddd,  $J$  = 17.1, 10.5, 6.5 Hz, 1H), 5.38-4.95 (m, 3H), 2.04 (s, 3H), 1.88-1.46 (m, 7H), 1.41-1.01 (m, 6H), 0.89-0.81 (m, 2H) ppm. <sup>13</sup>C NMR (100 MHz, CDCl<sub>3</sub>):  $\delta$  170.4, 136.7, 116.5, 75.2, 37.5, 33.3 (overlap), 32.6, 31.6, 26.6 (overlap), 26.3, 21.2 ppm. HRMS (ESI<sup>+</sup>):  $m/z$  calcd for C<sub>13</sub>H<sub>22</sub>O<sub>2</sub>Na [M+Na]<sup>+</sup> 233.1512, found 233.1509.

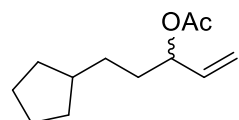

**1g**

$R_f$  = 0.29 (petroleum ether/ethyl acetate 50/1).  $^1\text{H NMR}$  (400 MHz,  $\text{CDCl}_3$ ):  $\delta$  5.75 (ddd,  $J$  = 17.2, 10.5, 6.3 Hz, 1H), 5.37-4.99 (m, 3H), 2.03 (s, 3H), 1.84-1.67 (m, 3H), 1.65-1.53 (m, 4H), 1.50-1.40 (m, 2H), 1.30-1.35 (m, 2H), 1.11-0.90 (m, 2H) ppm.  $^{13}\text{C NMR}$  (100 MHz,  $\text{CDCl}_3$ ):  $\delta$  170.3, 136.7, 116.5, 75.0, 39.9, 33.4, 32.6, 32.6, 31.4, 25.1 (overlap), 21.2 ppm. **HRMS** ( $\text{ESI}^+$ ):  $m/z$  calcd for  $\text{C}_{12}\text{H}_{20}\text{O}_2\text{Na}$   $[\text{M}+\text{Na}]^+$  219.1356, found 219.1355.

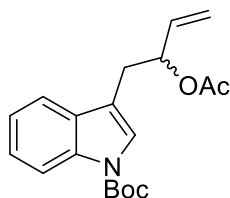

**1k**

$R_f$  = 0.47 (petroleum ether/ethyl acetate 18/1).  $^1\text{H NMR}$  (400 MHz,  $\text{CD}_3\text{OD}$ ):  $\delta$  8.11 (d,  $J$  = 8.2 Hz, 1H), 7.60 (d,  $J$  = 7.6 Hz, 1H), 7.42 (s, 1H), 7.36-7.20 (m, 2H), 5.86 (ddd,  $J$  = 17.0, 10.5, 6.2 Hz, 1H), 5.56-5.51 (m, 1H), 5.34-5.06 (m, 2H), 3.07 (dd,  $J$  = 14.5, 6.7 Hz, 1H), 2.96 (dd,  $J$  = 14.5, 6.7 Hz, 1H), 2.04 (s, 3H), 1.67 (s, 9H) ppm.  $^{13}\text{C NMR}$  (100 MHz,  $\text{CD}_3\text{OD}$ ):  $\delta$  170.2, 149.7, 135.8, 134.1, 130.7, 124.3, 124.0, 122.4, 119.2, 117.2, 115.8, 115.2, 83.5, 74.1, 30.2, 28.2 (overlap), 21.3 ppm. **HRMS** ( $\text{ESI}^+$ ):  $m/z$  calcd for  $\text{C}_{19}\text{H}_{23}\text{NO}_4\text{Na}$   $[\text{M}+\text{Na}]^+$  352.1519, found 352.1519.

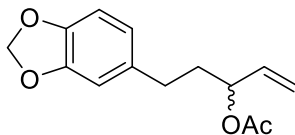

**1l**

$R_f$  = 0.28 (petroleum ether/ethyl acetate 15/1).  $^1\text{H NMR}$  (400 MHz,  $\text{CDCl}_3$ ):  $\delta$  6.72-6.47 (m, 3H), 5.91 (s, 2H), 5.79 (ddd,  $J$  = 17.2, 10.5, 6.3 Hz, 1H), 5.47-5.07 (m, 3H), 2.69-2.44 (m, 2H), 2.07 (s, 3H), 2.00-1.72 (m, 2H) ppm.  $^{13}\text{C NMR}$  (100 MHz,  $\text{CDCl}_3$ ):  $\delta$  170.3, 147.6, 145.7, 136.3, 135.1, 121.1, 116.9, 108.8, 108.2, 100.8, 74.2, 36.1, 31.2, 21.2 ppm. **HRMS** ( $\text{ESI}^+$ ):  $m/z$  calcd for  $\text{C}_{14}\text{H}_{16}\text{O}_4\text{Na}$   $[\text{M}+\text{Na}]^+$  271.0941, found 271.0937.

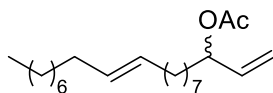

**1n**

$R_f$  = 0.30 (petroleum ether/ethyl acetate 50/1).  $^1\text{H NMR}$  (400 MHz,  $\text{CDCl}_3$ ):  $\delta$  5.77 (ddd,  $J$  = 17.1, 10.5, 6.4 Hz, 1H), 5.54-5.32 (m, 2H), 5.28-5.05 (m, 3H), 2.06 (s, 3H), 1.98-1.94 (m, 4H), 1.63-1.55 (m, 2H), 1.33-1.26 (m, 22H), 0.88 (t,  $J$  = 6.6 Hz, 3H) ppm.  $^{13}\text{C NMR}$  (100 MHz,  $\text{CDCl}_3$ ):  $\delta$  170.4, 136.7, 130.4, 130.2, 116.5, 74.9, 34.2, 32.6, 32.5, 31.9, 29.7, 29.6, 29.5, 29.4, 29.3 (overlap), 29.2,

29.0, 25.1, 22.7, 21.2, 14.1 ppm. **HRMS** (ESI<sup>+</sup>):  $m/z$  calcd for C<sub>22</sub>H<sub>40</sub>O<sub>2</sub>Na [M+Na]<sup>+</sup> 359.2921, found 359.2919.

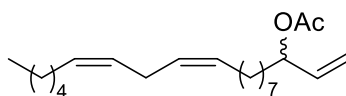

**1o**

$R_f$  = 0.30 (petroleum ether/ethyl acetate 50/1). **<sup>1</sup>H NMR** (400 MHz, CDCl<sub>3</sub>):  $\delta$  5.76 (ddd,  $J$  = 17.1, 10.5, 6.4 Hz, 1H), 5.41-5.34 (m, 4H), 5.27-5.04 (m, 3H), 2.77 (t,  $J$  = 6.4 Hz, 2H), 2.07-2.03 (m, 7H), 1.66-1.57 (m, 2H), 1.51-1.18 (m, 16H), 0.88 (t,  $J$  = 6.7 Hz, 3H) ppm. **<sup>13</sup>C NMR** (100 MHz, CDCl<sub>3</sub>):  $\delta$  170.3, 136.6, 130.2, 130.1, 128.0, 127.9, 116.5, 74.8, 34.2 (overlap), 31.5(overlap), 29.6, 29.4, 29.3, 29.2, 27.2, 25.6, 25.0, 22.6, 21.2, 14.1 ppm. **HRMS** (ESI<sup>+</sup>):  $m/z$  calcd for C<sub>22</sub>H<sub>38</sub>O<sub>2</sub>Na [M+Na]<sup>+</sup> 357.2764, found 357.2769.

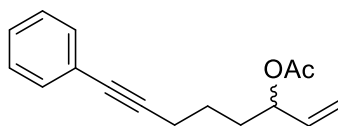

**1p**

$R_f$  = 0.51 (petroleum ether/ethyl acetate 18/1). **<sup>1</sup>H NMR** (400 MHz, CDCl<sub>3</sub>)  $\delta$  7.53-7.36 (m, 2H), 7.27 (dd,  $J$  = 5.2, 2.0 Hz, 3H), 5.79 (ddd,  $J$  = 17.0, 10.5, 6.4 Hz, 1H), 5.44-4.90 (m, 3H), 2.43 (t,  $J$  = 7.0 Hz, 2H), 2.07 (s, 3H), 1.91-1.73 (m, 2H), 1.71-1.55 (m, 2H) ppm. **<sup>13</sup>C NMR** (100 MHz, CDCl<sub>3</sub>)  $\delta$  170.3, 136.3, 131.6 (overlap), 128.2 (overlap), 127.6, 123.9, 116.8, 89.5, 81.1, 74.3, 33.3, 24.3, 21.2, 19.2 ppm. **HRMS** (ESI<sup>+</sup>):  $m/z$  calcd for C<sub>16</sub>H<sub>18</sub>O<sub>2</sub>Na [M+Na]<sup>+</sup> 265.1199, found 265.1199.

### General procedure for preparation of (*S*)-Ir-Ligand<sup>[2]</sup>

The preparation of (*S*)-Ir-Ligand described previously by Prof. Michael J. Krische was modified as follows: To a mixture of [Ir(cod)Cl]<sub>2</sub> (100 mmol%), (*S*)-Ligand (200 mmol%), Cs<sub>2</sub>CO<sub>3</sub> (400 mmol%), 4-CN-3-NO<sub>2</sub>BzOH (400 mmol%) and allyl acetate (500 mmol%) in a sealed tube under argon atmosphere was added THF (0.05 M). The reaction mixture was stirred for 30 min at ambient temperature and heated for 1.5 h at 80 °C, at which point the reaction mixture was allowed to cool to ambient temperature. The reaction mixture was filtered through a celite and washed with CH<sub>2</sub>Cl<sub>2</sub>. The filtrate was concentrated *in vacuo* and subjected to column chromatography (CH<sub>2</sub>Cl<sub>2</sub>/Et<sub>2</sub>O 10/1). The obtained gum-like product was dissolved in THF and precipitated upon the rapid addition of HPLC-grade hexanes. A yellow precipitate formed, which was collected by filtration and dried under vacuum.



## Preparation of (*rac*)-Ir-Ligand

The preparation of (*rac*)-Ir-Ligand was achieved by using the above procedure with BIPHEP to afford (*rac*)-Ir-BIPHEP.

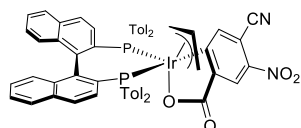

(*S*)-Ir-Tol-BINAP  
cat-1

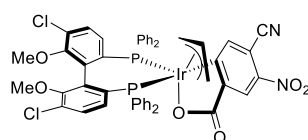

(*S*)-Ir-Cl, OMe-BIPHEP  
cat-2

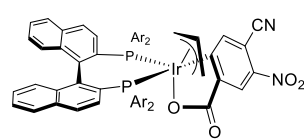

(*S*)-Ir-DM-BINAP  
cat-3

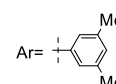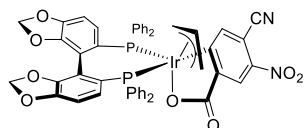

(*S*)-Ir-SEGPHOS  
cat-4

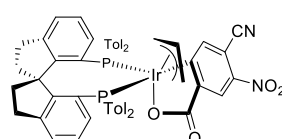

(*S*)-Ir-Tol-SDP  
cat-5

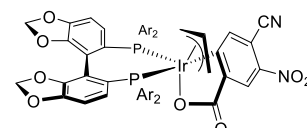

(*S*)-Ir-DM-SEGPHOS  
cat-6

## General procedure for the enantioselective synthesis of skipped dienes

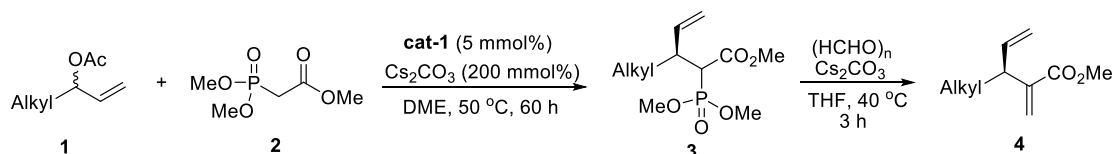

### General procedure:

A pressure tube equipped with a magnetic stir bar was charged with (*S*)-Ir-tol-BINAP (5 mmol%), cesium carbonate (200 mmol%), then dried DME (0.5 M), trimethyl phosphonoacetate **2** (200 mmol%), allylic acetate **1** (100 mmol%) were added. The tube was purged with argon for 1 minute and sealed with a PTFE-lined cap. Then, the tube was placed in an oil bath at the indicated temperature and stirred for the indicated period. After cooling to ambient temperature, the crude reaction mixture was directly subjected to flash column chromatography to obtain intermediate **3**. The  $\alpha$ -allylic phosphonate **3** was then taken in a round-bottom flask and dissolved in THF (0.1 M), followed by the sequential addition of Cs<sub>2</sub>CO<sub>3</sub> (3.0 equiv) and paraformaldehyde (6.0 equiv) under open air. The resulting mixture was then stirred at 40 °C (an oil bath) until TLC revealed the complete consumption of **3**. Then, the crude mixture was directly purified by silica-gel flash column chromatography to obtain **4**.

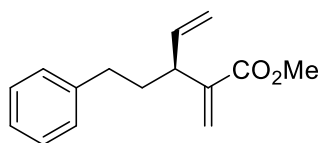

**4a**

$R_f$  = 0.47 (petroleum ether/ethyl acetate 40/1).  $^1\text{H NMR}$  (400 MHz,  $\text{CDCl}_3$ ):  $\delta$  7.29-7.25 (m, 2H), 7.21-7.12 (m, 3H), 6.23 (s, 1H), 5.82 (ddd,  $J$  = 19.3, 9.7, 8.0 Hz, 1H), 5.58 (s, 1H), 5.26-4.98 (m, 2H), 3.74 (s, 3H), 3.28 (m, 1H), 2.66 (ddd,  $J$  = 13.7, 10.2, 5.7 Hz, 1H), 2.57 (ddd,  $J$  = 13.7, 10.1, 5.9 Hz, 1H), 1.92 (m, 1H), 1.82 (m, 1H) ppm.  $^{13}\text{C NMR}$  (100 MHz,  $\text{CDCl}_3$ ):  $\delta$  167.4, 143.1, 142.1, 139.9, 128.4 (overlap), 128.3 (overlap), 125.8, 124.4, 115.8, 51.8, 44.7, 35.4, 33.7 ppm. **FT-IR** (KBr): 3083, 3063, 3026, 2979, 2952, 2858, 1755, 1738, 1641, 1603, 1454, 1435, 1298, 1265, 1246, 1199, 1153, 925, 748, 700  $\text{cm}^{-1}$ . **HRMS** (ESI $^+$ ):  $m/z$  calcd for  $\text{C}_{15}\text{H}_{19}\text{O}_2$   $[\text{M}+\text{H}]^+$  231.1380, found 231.1380.  $[\alpha]_{\text{D}}^{25.0}$  = +25.77 ( $c$  = 0.35,  $\text{CHCl}_3$ ). **HPLC**: Daicel Chiralpak OJ,  $n$ -hexane/ $i$ -PrOH = 98/2, 1.0 mL/min, 20  $^\circ\text{C}$ , 210 nm;  $[t_1$  (major) = 9.274 min,  $t_2$  (minor) = 11.363 min], 96% *ee*.

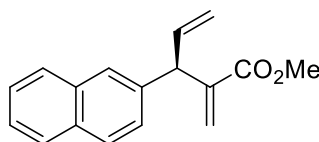

**4b**

$R_f$  = 0.41 (petroleum ether/ethyl acetate 40/1).  $^1\text{H NMR}$  (400 MHz,  $\text{CDCl}_3$ ):  $\delta$  7.82-7.78 (m, 3H), 7.64 (s, 1H), 7.48-7.42 (m, 2H), 7.34 (dd,  $J$  = 8.5, 1.8 Hz, 1H), 6.43 (s, 1H), 6.18 (ddd,  $J$  = 17.0, 10.2, 6.7 Hz, 1H), 5.65 (s, 1H), 5.24 (d,  $J$  = 10.2 Hz, 1H), 4.99 (d,  $J$  = 17.0 Hz, 1H), 4.85 (d,  $J$  = 6.7 Hz, 1H), 3.69 (s, 3H) ppm.  $^{13}\text{C NMR}$  (100 MHz,  $\text{CDCl}_3$ ):  $\delta$  167.2, 142.4, 138.8, 138.2, 133.5, 132.4, 128.0, 127.8, 127.6, 127.2, 126.9, 126.5, 126.0, 125.6, 117.0, 52.0, 50.2 ppm. **FT-IR** (ATR ITX - DIAMOND): 3055, 2960, 2917, 2849, 2180, 2153, 1628, 1600, 1508, 1436, 1407, 1328, 1192, 953, 923, 859, 748  $\text{cm}^{-1}$ . **HRMS** (ESI $^+$ ):  $m/z$  calcd for  $\text{C}_{17}\text{H}_{16}\text{O}_2\text{Na}$   $[\text{M}+\text{Na}]^+$  275.1043, found 275.1039.  $[\alpha]_{\text{D}}^{24.9}$  = -79.27 ( $c$  = 0.74,  $\text{CHCl}_3$ ). **HPLC**: Daicel Chiralpak AD-H,  $n$ -hexane/ $i$ -PrOH = 99.2/0.8, 0.6 mL/min, 15  $^\circ\text{C}$ , 210 nm;  $[t_1$  (major) = 11.768 min,  $t_2$  (minor) = 12.350 min], 53% *ee*.

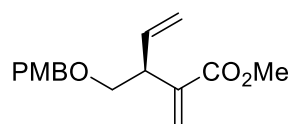

**4c**

$R_f$  = 0.39 (petroleum ether/ethyl acetate 10/1).  $^1\text{H NMR}$  (400 MHz,  $\text{CDCl}_3$ ):  $\delta$  7.26-7.22 (m, 2H), 6.88-6.85 (m, 2H), 6.28 (s, 1H), 5.89 (ddd,  $J$  = 17.3, 10.2, 6.6 Hz, 1H), 5.62 (s, 1H), 5.15-5.10 (m, 2H), 4.45 (s, 2H), 3.80 (s, 3H), 3.73 (s, 3H), 3.63 (m, 1H), 3.58-3.52 (m, 2H) ppm.  $^{13}\text{C NMR}$  (100

MHz, CDCl<sub>3</sub>):  $\delta$  167.2, 159.1, 140.3, 137.2, 130.4, 129.2 (overlap), 126.0, 116.6, 113.7 (overlap), 72.6, 71.5, 55.3, 51.9, 45.0 ppm. **FT-IR** (KBr): 2957, 1723, 1613, 1513, 1465, 1440, 1249, 1171, 1098, 1036, 922, 819 cm<sup>-1</sup>. **HRMS** (ESI<sup>+</sup>):  $m/z$  calcd for C<sub>16</sub>H<sub>20</sub>O<sub>4</sub>Na [M+Na]<sup>+</sup> 299.1254, found 299.1250.  $[\alpha]_D^{24.5} = +8.47$  ( $c = 0.77$ , CHCl<sub>3</sub>). **HPLC**: Daicel Chiralpak OJ-H, *n*-hexane/*i*-PrOH = 96/4, 1.0 mL/min, 20 °C, 210 nm; [t<sub>1</sub> (major) = 24.546 min, t<sub>2</sub> (minor) = 28.643 min], 95% *ee*.

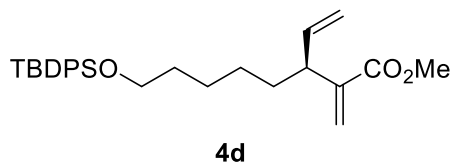

$R_f = 0.49$  (petroleum ether/ethyl acetate 40/1). **<sup>1</sup>H NMR** (400 MHz, CDCl<sub>3</sub>):  $\delta$  7.69-7.66 (m, 4H), 7.43-7.37 (m, 6H), 6.20 (s, 1H), 5.77 (ddd,  $J = 17.7, 10.2, 8.0$  Hz, 1H), 5.54 (s, 1H), 5.07-5.02 (m, 2H), 3.75 (s, 3H), 3.65 (t,  $J = 6.5$  Hz, 2H), 3.22 (m, 1H), 1.58-1.50 (m, 4H), 1.40-1.27 (m, 4H), 1.06 (s, 9H) ppm. **<sup>13</sup>C NMR** (100 MHz, CDCl<sub>3</sub>):  $\delta$  167.5, 143.4, 140.3, 135.6 (overlap), 134.2 (overlap), 129.5 (overlap), 127.6 (overlap), 124.1, 115.2, 63.9, 51.8, 44.9, 33.7, 32.5, 29.7, 27.2, 26.9 (overlap), 25.7, 19.2 ppm. **FT-IR** (KBr): 3072, 2932, 2858, 1724, 1625, 1430, 1256, 1192, 1147, 1110, 998, 917, 822, 740, 704, 613 cm<sup>-1</sup>. **HRMS** (ESI<sup>+</sup>):  $m/z$  calcd for C<sub>28</sub>H<sub>38</sub>O<sub>3</sub>SiNa [M+Na]<sup>+</sup> 473.2482, found 473.2476.  $[\alpha]_D^{24.9} = +13.40$  ( $c = 0.37$ , CHCl<sub>3</sub>). **HPLC**: Daicel Chiralpak OD-H, *n*-hexane/*i*-PrOH = 99.5/0.5, 0.57 mL/min, 20 °C, 210 nm; [t<sub>1</sub> (major) = 9.240 min, t<sub>2</sub> (minor) = 10.072 min], 94% *ee*.

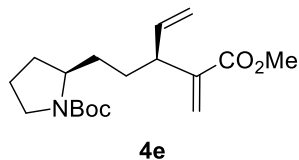

$R_f = 0.35$  (petroleum ether/ethyl acetate 10/1). **<sup>1</sup>H NMR** (400 MHz, CD<sub>3</sub>OD):  $\delta$  6.18 (s, 1H), 5.81 (ddd,  $J = 17.0, 10.3, 8.1$  Hz, 1H), 5.61 (s, 1H), 5.07-5.02 (m, 2H), 3.73 (s, 3H), 3.37-3.26 (m, 3H), 3.19 (m, 1H), 1.93-1.77 (m, 4H), 1.76-1.64 (m, 2H), 1.63-1.53 (m, 2H), 1.44 (s, 9H) ppm. **<sup>13</sup>C NMR** (150 MHz, CD<sub>3</sub>OD):  $\delta$  168.8, 156.7, 144.9, 141.6, 125.2, 116.1, 80.9, 59.1, 52.5, 47.4, 46.8, 33.7, 31.8, 31.7, 29.0 (overlap), 24.1 ppm. **FT-IR** (KBr): 3083, 3063, 3026, 2979, 2952, 2858, 1755, 1738, 1641, 1603, 1454, 1435, 1298, 1265, 1246, 1199, 1153, 925, 748, 700 cm<sup>-1</sup>. **HRMS** (ESI<sup>+</sup>):  $m/z$  calcd for C<sub>18</sub>H<sub>29</sub>NO<sub>4</sub>Na [M+Na]<sup>+</sup> 346.1989, found 346.1990.  $[\alpha]_D^{24.7} = -27.43$  ( $c = 0.14$ , CHCl<sub>3</sub>). **HPLC**: Daicel Chiralpak OD-H, *n*-hexane/*i*-PrOH = 99.3/0.7, 0.45 mL/min, 15 °C, 210 nm; [t<sub>1</sub> (major) = 19.455 min, t<sub>2</sub> (minor) = 20.926 min], 84% *ee*.

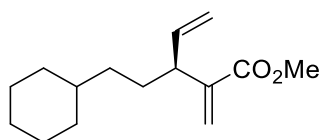

**4f**

$R_f$  = 0.59 (petroleum ether/ethyl acetate 40/1).  $^1\text{H NMR}$  (400 MHz,  $\text{CDCl}_3$ ):  $\delta$  6.19 (s, 1H), 5.70 (ddd,  $J$  = 17.3, 10.1, 7.7 Hz, 1H), 5.53 (s, 1H), 5.10-5.00 (m, 2H), 3.75 (s, 3H), 3.17 (m, 1H), 1.70-1.61 (m, 6H), 1.47 (m, 1H), 1.25-1.10 (m, 6H), 0.89-0.81 (m, 2H) ppm.  $^{13}\text{C NMR}$  (100 MHz,  $\text{CDCl}_3$ ):  $\delta$  167.5, 143.5, 140.5, 124.1, 115.1, 51.8, 45.1, 37.7, 35.1, 33.4, 33.3, 31.0 (overlap), 26.7, 26.4 ppm. **FT-IR** (KBr): 2924, 2852, 1725, 1626, 1440, 1259, 1194, 1133, 999, 943, 916, 816  $\text{cm}^{-1}$ . **HRMS** ( $\text{ESI}^+$ ):  $m/z$  calcd for  $\text{C}_{15}\text{H}_{24}\text{O}_2\text{Na}$  [ $\text{M}+\text{Na}$ ] $^+$  259.1669, found 259.1674.  $[\alpha]_{\text{D}}^{25.0} = +25.19$  ( $c$  = 0.52,  $\text{CHCl}_3$ ). **HPLC**: Daicel Chiralpak OC-H, *n*-hexane/*i*-PrOH = 99.6/0.4, 0.6 mL/min, 15 °C, 210 nm; [ $t_1$  (major) = 16.852 min,  $t_2$  (minor) = 18.954 min], 89% *ee*.

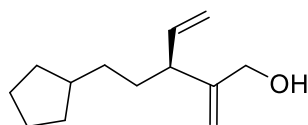

**4g'**

The compound **4g** was prepared according to the general procedure (50 °C oil bath, 60 h). The crude reaction mixture was purified on silica gel to afford **4g**, then **4g** was reduced by Dibal-H (1.5 M in toluene, 2.5 equiv) to obtain **4g'** as a colorless oil (petroleum ether/ethyl acetate 10/1).

$R_f$  = 0.36 (petroleum ether/ethyl acetate 10/1).  $^1\text{H NMR}$  (400 MHz,  $\text{CDCl}_3$ ):  $\delta$  5.69 (ddd,  $J$  = 17.9, 10.1, 8.2 Hz, 1H), 5.11 (s, 1H), 5.07-4.98 (m, 2H), 4.94 (s, 1H), 4.08 (s, 2H), 2.67 (m, 1H), 1.78-1.68 (m, 3H), 1.61-1.54 (m, 4H), 1.52-1.45 (m, 4H), 1.35-1.28 (m, 2H) ppm.  $^{13}\text{C NMR}$  (100 MHz,  $\text{CDCl}_3$ ):  $\delta$  151.1, 141.5, 114.6, 109.3, 65.0, 47.6, 40.2, 33.9, 32.7, 32.6, 32.1, 29.7, 25.2 ppm. **FT-IR** (ATR ITX - DIAMOND): 3854, 3343, 2955, 2919, 2850, 2182, 2069, 2028, 2005, 1967, 1636, 1457, 1413, 1377, 1260, 1089, 1020, 911, 868, 797, 687  $\text{cm}^{-1}$ . **HRMS** ( $\text{ESI}^+$ ):  $m/z$  calcd for  $\text{C}_{13}\text{H}_{23}\text{O}$  [ $\text{M}+\text{H}$ ] $^+$  195.1743, found 195.1739.  $[\alpha]_{\text{D}}^{25.0} = +51.16$  ( $c$  = 0.50,  $\text{CHCl}_3$ ). **HPLC**: Daicel Chiralpak IC, *n*-hexane/*i*-PrOH = 99/1, 0.6 mL/min, 20 °C, 210 nm; [ $t_1$  (major) = 22.287 min,  $t_2$  (minor) = 23.502 min], 94% *ee*.

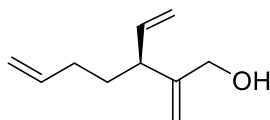

**4h'**

The compound **4h** was prepared according to the general procedure (50 °C oil bath, 60 h). The crude reaction mixture was purified on silica gel to afford **4h**, then **4h** was reduced by Dibal-H (1.5 M in toluene, 2.5 equiv) to obtain **4h'** as a colorless oil (petroleum ether/ethyl acetate 10/1).

$R_f$  = 0.29 (petroleum ether/ethyl acetate 10/1).  $^1\text{H NMR}$  (400 MHz,  $\text{CDCl}_3$ ):  $\delta$  5.80 (ddd,  $J$  = 16.9, 10.3, 6.6 Hz, 1H), 5.68 (ddd,  $J$  = 17.1, 10.2, 8.3 Hz, 1H), 5.13-4.90 (m, 6H), 4.09 (s, 2H), 2.74 (m, 1H), 2.17-1.95 (m, 2H), 1.76-1.51 (m, 2H) ppm.  $^{13}\text{C NMR}$  (100 MHz,  $\text{CDCl}_3$ ):  $\delta$  150.7, 141.0, 138.5, 115.1, 114.8, 109.6, 65.0, 46.6, 32.0, 31.4 ppm. **FT-IR** (ATR ITX - DIAMOND): 3329, 3077, 2963, 2927, 2855, 1640, 1413, 1260, 1091, 1019, 912, 863, 800, 701  $\text{cm}^{-1}$ . **HRMS** ( $\text{ESI}^+$ ):  $m/z$  calcd for  $\text{C}_{10}\text{H}_{16}\text{ONa}$   $[\text{M}+\text{Na}]^+$  175.1093, found 175.1098.  $[\alpha]_{\text{D}}^{25.0} = +48.40$  ( $c$  = 0.45,  $\text{CHCl}_3$ ). **HPLC**: Daicel Chiralpak IC,  $n$ -hexane/ $i$ -PrOH = 97.7/2.3, 0.4 mL/min, 15  $^\circ\text{C}$ , 210 nm; [ $t_1$  (major) = 23.319 min,  $t_2$  (minor) = 24.105 min], 93% *ee*.

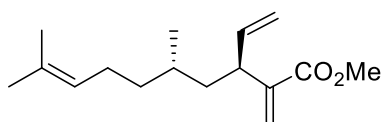

**4i**

$R_f$  = 0.66 (petroleum ether/ethyl acetate 15/1).  $^1\text{H NMR}$  (400 MHz,  $\text{CDCl}_3$ ):  $\delta$  6.18 (s, 1H), 5.72 (ddd,  $J$  = 17.1, 10.2, 8.2 Hz, 1H), 5.54 (s, 1H), 5.10-5.02 (m, 3H), 3.75 (s, 3H), 3.38-3.32 (m, 1H), 2.00-1.91 (m, 2H), 1.67 (s, 3H), 1.59 (s, 3H), 1.53-1.43 (m, 2H), 1.33-1.28 (m, 2H), 1.15 (m, 1H), 0.89 (d,  $J$  = 6.3 Hz, 3H) ppm.  $^{13}\text{C NMR}$  (100 MHz,  $\text{CDCl}_3$ ):  $\delta$  167.5, 144.0, 140.2, 131.1, 124.8, 123.9, 115.4, 51.8, 42.5, 41.1, 37.5, 29.9, 25.7, 25.4, 19.1, 17.7 ppm. **FT-IR** (KBr): 2958, 2923, 2853, 1727, 1644, 1466, 1261, 1081  $\text{cm}^{-1}$ . **HRMS** ( $\text{ESI}^+$ ):  $m/z$  calcd for  $\text{C}_{16}\text{H}_{26}\text{O}_2\text{Na}$   $[\text{M}+\text{Na}]^+$  273.1825, found 273.1820.  $[\alpha]_{\text{D}}^{24.4} = +17.00$  ( $c$  = 0.60,  $\text{CHCl}_3$ ). **HPLC**: Daicel Chiralpak AD-H,  $n$ -hexane/ $i$ -PrOH = 96.6/0.4, 0.6 mL/min, 20  $^\circ\text{C}$ , 230 nm; [ $t_1$  (minor) = 8.585 min,  $t_2$  (major) = 9.107 min], 96% *ee*.

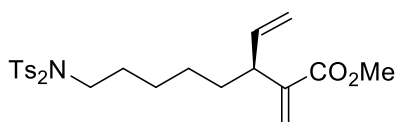

**4j**

$R_f$  = 0.18 (petroleum ether/ethyl acetate 10/1).  $^1\text{H NMR}$  (400 MHz,  $\text{CDCl}_3$ ):  $\delta$  7.89 (d,  $J$  = 8.0 Hz, 4H), 7.33 (d,  $J$  = 8.0 Hz, 4H), 6.19 (s, 1H), 5.74 (ddd,  $J$  = 17.6, 9.8, 8.0 Hz, 1H), 5.53 (s, 1H), 5.10-5.00 (m, 2H), 3.75 (s, 3H), 3.62 (t,  $J$  = 8.1 Hz, 2H), 3.19 (m, 1H), 2.45 (s, 6H), 1.68-1.62 (m, 2H), 1.56-1.38 (m, 2H), 1.25-1.20 (m, 4H) ppm.  $^{13}\text{C NMR}$  (100 MHz,  $\text{CDCl}_3$ ):  $\delta$  167.4, 144.8, 143.3 (overlap), 140.1, 137.2 (overlap), 129.6 (overlap), 128.2 (overlap), 124.2, 115.3, 51.8, 49.3, 44.7, 33.4, 29.7, 26.7, 26.4, 21.7 (overlap) ppm. **FT-IR** (ATR ITX - DIAMOND): 3362, 2962, 2925, 2852, 1975, 1720, 1598, 1459, 1372, 1164, 867, 704, 663, 553  $\text{cm}^{-1}$ . **HRMS** ( $\text{ESI}^+$ ):  $m/z$  calcd for  $\text{C}_{26}\text{H}_{33}\text{NO}_6\text{S}_2\text{Na}$   $[\text{M}+\text{Na}]^+$  542.1642, found 542.1641.  $[\alpha]_{\text{D}}^{25.0} = +5.54$  ( $c$  = 0.13,  $\text{CHCl}_3$ ). **HPLC**: Daicel Chiralpak OD-H,  $n$ -hexane/ $i$ -PrOH = 99/1, 0.6 mL/min, 20  $^\circ\text{C}$ , 230 nm; [ $t_1$  (major) = 12.175 min,  $t_2$  (minor) = 12.982 min], 89% *ee*.

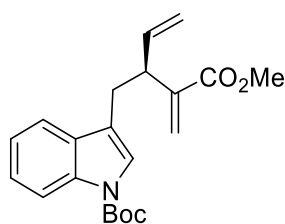

**4k**

$R_f$  = 0.50 (petroleum ether/ethyl acetate 10/1).  $^1\text{H NMR}$  (400 MHz,  $\text{CDCl}_3$ ):  $\delta$  8.10 (s, 1H), 7.59 (d,  $J$  = 7.2 Hz, 1H), 7.37-7.25 (m, 2H), 7.24-7.22 (m, 1H), 6.24 (s, 1H), 5.91 (ddd,  $J$  = 16.8, 10.5, 7.7 Hz, 1H), 5.62 (s, 1H), 5.13-4.93 (m, 2H), 3.78-3.71 (m, 4H), 3.04 (dd,  $J$  = 14.6, 8.4, 1H), 2.88 (dd,  $J$  = 14.6, 8.4 Hz, 1H), 1.67 (s, 9H) ppm.  $^{13}\text{C NMR}$  (100 MHz,  $\text{CDCl}_3$ ):  $\delta$  167.2, 149.8, 142.6, 139.3, 135.4, 130.8, 125.2, 124.2, 123.5, 122.3, 119.1, 118.5, 116.0, 115.2, 83.4, 51.9, 44.8, 29.6, 28.2 (overlap) ppm. **FT-IR** (KBr): 2928, 1729, 1627, 1454, 1371, 1311, 1255, 1160, 1083, 1017, 920, 858, 817, 747  $\text{cm}^{-1}$ . **HRMS** (ESI $^+$ ):  $m/z$  calcd for  $\text{C}_{21}\text{H}_{25}\text{NO}_4\text{Na}$   $[\text{M}+\text{Na}]^+$  378.1676, found 378.1678.  $[\alpha]_{\text{D}}^{24.7}$  = +9.54 ( $c$  = 1.20,  $\text{CHCl}_3$ ). **HPLC**: Daicel Chiralpak AD-H,  $n$ -hexane/ $i$ -PrOH = 99.5/0.5, 0.5 mL/min, 15  $^\circ\text{C}$ , 210 nm; [ $t_1$  (major) = 28.288 min,  $t_2$  (minor) = 32.749 min], 92% *ee*.

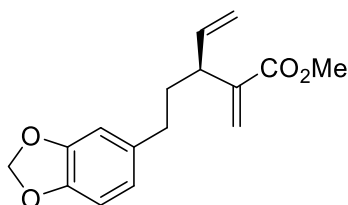

**4l**

$R_f$  = 0.34 (petroleum ether/ethyl acetate 40/1).  $^1\text{H NMR}$  (400 MHz,  $\text{CDCl}_3$ ):  $\delta$  6.72 (d,  $J$  = 7.9 Hz, 1H), 6.66 (s, 1H), 6.61 (d,  $J$  = 7.9 Hz, 1H), 6.22 (s, 1H), 5.91 (s, 2H), 5.80 (ddd,  $J$  = 17.7, 9.8, 8.0 Hz, 1H), 5.57 (s, 1H), 5.11-5.06 (m, 2H), 3.75 (s, 3H), 3.26 (m, 1H), 2.58 (ddd,  $J$  = 13.9, 10.1, 6.3 Hz, 1H), 2.49 (ddd,  $J$  = 13.9, 10.0, 6.5 Hz, 1H), 1.92-1.83 (m, 1H), 1.81-1.72 (m, 1H) ppm.  $^{13}\text{C NMR}$  (100 MHz,  $\text{CDCl}_3$ ):  $\delta$  167.4, 147.5, 145.6, 143.1, 139.9, 135.9, 124.4, 121.1, 115.8, 108.9, 108.1, 100.7, 51.8, 44.5, 35.6, 33.4 ppm. **FT-IR** (KBr): 2962, 2920, 1727, 1443, 1261, 1093, 1021, 865, 801, 703  $\text{cm}^{-1}$ . **HRMS** (ESI $^+$ ):  $m/z$  calcd for  $\text{C}_{16}\text{H}_{18}\text{O}_4\text{Na}$   $[\text{M}+\text{Na}]^+$  297.1097, found 297.1092.  $[\alpha]_{\text{D}}^{25.0}$  = +7.40 ( $c$  = 0.10,  $\text{CHCl}_3$ ). **HPLC**: Daicel Chiralpak IC,  $n$ -hexane/ $i$ -PrOH = 99/1, 1.0 mL/min, 20  $^\circ\text{C}$ , 210 nm; [ $t_1$  (minor) = 9.940 min,  $t_2$  (major) = 10.557 min], 91% *ee*.

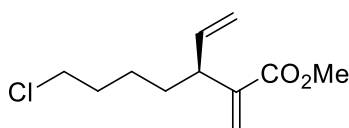

**4m**

$R_f$  = 0.48 (petroleum ether/ethyl acetate 40/1).  $^1\text{H NMR}$  (400 MHz,  $\text{CDCl}_3$ ):  $\delta$  6.21 (s, 1H), 5.77 (ddd,  $J$  = 17.0, 10.3, 8.0 Hz, 1H), 5.56 (s, 1H), 5.09-5.04 (m, 2H), 3.75 (s, 3H), 3.52 (t,  $J$  = 6.7 Hz, 2H), 3.23 (m, 1H), 1.82-1.74 (m, 2H), 1.64-1.36 (m, 4H) ppm.  $^{13}\text{C NMR}$  (100 MHz,  $\text{CDCl}_3$ ):  $\delta$  167.4, 143.1, 139.9, 124.4, 115.6, 51.9, 44.9, 44.8, 32.9, 32.4, 24.7 ppm. **FT-IR** (KBr): 2929, 2859, 1723, 1626, 1438, 1256, 1194, 1138, 996, 947, 919, 818  $\text{cm}^{-1}$ . **HRMS** ( $\text{ESI}^+$ ):  $m/z$  calcd for  $\text{C}_{11}\text{H}_{21}\text{NClO}_2$   $[\text{M}+\text{NH}_4]^+$  234.1255, found 234.1258.  $[\alpha]_D^{24.5} = +29.20$  ( $c$  = 1.07,  $\text{CHCl}_3$ ). **HPLC**: Daicel Chiralpak AD-H,  $n$ -hexane/ $i$ -PrOH = 99.5/0.5, 0.5 mL/min, 15  $^\circ\text{C}$ , 210 nm;  $[t_1$  (major) = 11.663 min,  $t_2$  (minor) = 12.278 min], 94% *ee*.

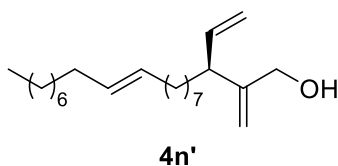

The compound **4n** was prepared according to the general procedure (50  $^\circ\text{C}$  oil bath, 60 h). The crude reaction mixture was purified on silica gel to afford **4n**, then **4n** was reduced by Dibal-H (1.5 M in toluene, 2.5 equiv) to obtain **4n'** as a colorless oil (petroleum ether/ethyl acetate 10/1).

$R_f$  = 0.42 (petroleum ether/ethyl acetate 10/1).  $^1\text{H NMR}$  (400 MHz,  $\text{CDCl}_3$ ):  $\delta$  5.68 (ddd,  $J$  = 17.8, 10.1, 8.2 Hz, 1H), 5.38 (t,  $J$  = 3.8 Hz, 2H), 5.10 (s, 1H), 5.07-4.98 (m, 2H), 4.94 (s, 1H), 4.08 (s, 2H), 2.69 (m, 1H), 1.98-1.94 (m, 4H), 1.55-1.45 (m, 2H), 1.32-1.26 (m, 22H), 0.88 (t,  $J$  = 6.6 Hz, 3H) ppm.  $^{13}\text{C NMR}$  (100 MHz,  $\text{CDCl}_3$ ):  $\delta$  151.1, 141.4, 130.4, 130.3, 114.7, 109.3, 65.0, 47.4, 32.9, 32.6, 32.6, 31.9, 29.7, 29.6(overlap), 29.5, 29.4, 29.3, 29.2, 29.1, 27.4, 22.7, 14.1 ppm. **FT-IR** (ATR ITX - DIAMOND): 3319, 2925, 2854, 2150, 1636, 1465, 1027, 966, 911, 722  $\text{cm}^{-1}$ . **HRMS** ( $\text{ESI}^+$ ):  $m/z$  calcd for  $\text{C}_{23}\text{H}_{42}\text{ONa}$   $[\text{M}+\text{Na}]^+$  357.3128, found 357.3132.  $[\alpha]_D^{25.9} = +35.82$  ( $c$  = 0.57,  $\text{CHCl}_3$ ). **HPLC**: Daicel Chiralpak IC,  $n$ -hexane/ $i$ -PrOH = 99.3/0.7, 0.4 mL/min, 15  $^\circ\text{C}$ , 210 nm;  $[t_1$  (major) = 22.937 min,  $t_2$  (minor) = 23.681 min], 80% *ee*.

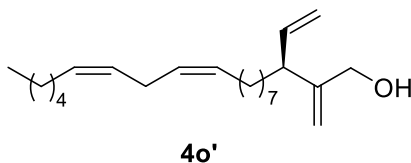

The compound **4o** was prepared according to the general procedure (50  $^\circ\text{C}$  oil bath, 60 h). The crude reaction mixture was purified on silica gel to afford **4o**, then **4o** was reduced by Dibal-H (1.5 M in toluene, 2.5 equiv) to obtain **4o'** as a colorless oil (petroleum ether/ethyl acetate 10/1).

$R_f$  = 0.39 (petroleum ether/ethyl acetate 10/1).  $^1\text{H NMR}$  (400 MHz,  $\text{CDCl}_3$ ):  $\delta$  5.68 (ddd,  $J$  = 17.7, 10.1, 8.2 Hz, 1H), 5.41-5.30 (m, 4H), 5.11 (s, 1H), 5.07-4.98 (m, 2H), 4.94 (s, 1H), 4.08 (s, 2H), 2.77 (t,  $J$  = 6.5 Hz, 2H), 2.69 (m, 1H), 2.07-2.02 (m, 4H), 1.60-1.42 (m, 4H), 1.36-1.25 (m, 14H), 0.89 (t,  $J$  = 6.7 Hz, 3H) ppm.  $^{13}\text{C NMR}$  (100 MHz,  $\text{CDCl}_3$ ):  $\delta$  151.1, 141.4, 130.2, 130.1, 128.0,

127.9, 114.7, 109.3, 65.0, 47.4, 32.9, 31.5, 29.7, 29.6, 29.5, 29.4, 29.3, 27.4, 27.3, 27.2, 25.6, 22.6, 14.1 ppm. **FT-IR** (ATR ITX - DIAMOND): 3327, 3077, 3009, 2927, 2855, 2180, 2150, 2008, 1635, 1465, 1260, 1024, 912, 799, 731  $\text{cm}^{-1}$ . **HRMS** (ESI<sup>+</sup>):  $m/z$  calcd for  $\text{C}_{23}\text{H}_{40}\text{ONa}$   $[\text{M}+\text{Na}]^+$  355.2971, found 355.2969.  $[\alpha]_{\text{D}}^{25.6} = +35.45$  ( $c = 0.73$ ,  $\text{CHCl}_3$ ). **HPLC**: Daicel Chiralpak IC, *n*-hexane/*i*-PrOH = 99.3/0.7, 0.4 mL/min, 15 °C, 210 nm; [ $t_1$  (major) = 25.383 min,  $t_2$  (minor) = 26.351 min], 93% *ee*.

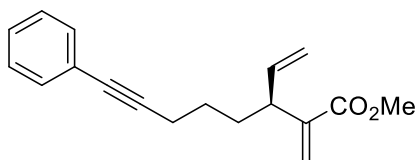

**4p**

$R_f = 0.43$  (petroleum ether/ethyl acetate 40/1). **<sup>1</sup>H NMR** (400 MHz,  $\text{CDCl}_3$ ):  $\delta$  7.40-7.36 (m, 2H), 7.28-7.26 (m, 3H), 6.23 (s, 1H), 5.79 (ddd,  $J = 17.7, 10.2, 7.9$  Hz, 1H), 5.59 (s, 1H), 5.16-5.02 (m, 2H), 3.75 (s, 3H), 3.29 (m, 1H), 2.41 (t,  $J = 6.9$  Hz, 2H), 1.81-1.54 (m, 4H) ppm. **<sup>13</sup>C NMR** (100 MHz,  $\text{CDCl}_3$ ):  $\delta$  167.4, 143.1, 140.0, 131.5, 128.2 (overlap), 127.5 (overlap), 124.4, 124.0, 115.5, 89.9, 80.8, 51.8, 44.5, 32.8, 26.6, 19.3 ppm. **FT-IR** (ATR ITX - DIAMOND): 3409, 3081, 2864, 2031, 1956, 1625, 1599, 1490, 1437, 1193, 1111, 1071, 999, 947, 917, 818, 692  $\text{cm}^{-1}$ . **HRMS** (ESI<sup>+</sup>):  $m/z$  calcd for  $\text{C}_{18}\text{H}_{20}\text{O}_2\text{Na}$   $[\text{M}+\text{Na}]^+$  291.1356, found 291.1354.  $[\alpha]_{\text{D}}^{25.0} = +24.95$  ( $c = 1.33$ ,  $\text{CHCl}_3$ ). **HPLC**: Daicel Chiralpak AD-H, *n*-hexane/*i*-PrOH = 99.5/0.5, 0.5 mL/min, 15 °C, 210 nm; [ $t_1$  (major) = 12.588 min,  $t_2$  (minor) = 13.312 min], 91% *ee*.

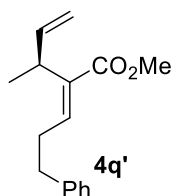

**4q'**

The compound was prepared according to the general procedure (50 °C oil bath, 60 h). Then **3q** was reacted with Phenylpropyl aldehyde (1.5 equiv) in the presence of sodium hydride (2.5 equiv) at 0 °C for 4 h to afford **4q'** (petroleum ether/ethyl acetate 40/1) as a colorless oil.

$R_f = 0.41$  (petroleum ether/ethyl acetate 40/1). **<sup>1</sup>H NMR** (400 MHz,  $\text{CDCl}_3$ ):  $\delta$  7.30-7.26 (m, 2H), 7.20-7.17 (m, 3H), 5.85-5.75 (m, 2H), 5.04-4.98 (m, 2H), 3.72 (s, 3H), 3.31-3.24 (m, 1H), 2.75-2.62 (m, 4H), 1.14 (d,  $J = 7.0$  Hz, 3H) ppm. **<sup>13</sup>C NMR** (100 MHz,  $\text{CDCl}_3$ ):  $\delta$  163.3, 146.0, 141.5, 137.8, 136.6, 128.5 (overlap), 128.3 (overlap), 125.9, 113.8, 51.3, 40.3, 35.7, 31.4, 18.9 ppm. **FT-IR** (KBr): 2962, 2919, 2851, 1727, 1261, 1093, 1021, 865, 801, 701  $\text{cm}^{-1}$ . **HRMS** (ESI<sup>+</sup>):  $m/z$  calcd for  $\text{C}_{16}\text{H}_{20}\text{O}_2\text{Na}$   $[\text{M}+\text{Na}]^+$  267.1356, found 267.1360.  $[\alpha]_{\text{D}}^{24.8} = -8.00$  ( $c = 0.10$ ,  $\text{CHCl}_3$ ). **HPLC**: Daicel Chiralpak OD-H, *n*-hexane/*i*-PrOH = 99.6/0.4, 0.62 mL/min, 15 °C, 210 nm; [ $t_1$  (major) = 26.802 min,  $t_2$  (minor) = 28.639 min], 98% *ee*.



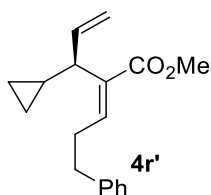

The compound was prepared according to the general procedure (50 °C oil bath, 60 h). Then **3r** was reacted with Phenylpropyl aldehyde (1.5 equiv) in the presence of sodium hydride (2.5 equiv) at 0 °C for 4 h to afford **4r'** (petroleum ether/ethyl acetate 40/1) as a colorless oil.

**R<sub>f</sub>** = 0.40 (petroleum ether/ethyl acetate 40/1). **<sup>1</sup>H NMR** (400 MHz, CDCl<sub>3</sub>): δ 7.30-7.26 (m, 2H), 7.20-7.16 (m, 3H), 5.98 (t, *J* = 7.1 Hz, 1H), 5.83 (ddd, *J* = 17.2, 10.3, 6.9 Hz, 1H), 5.09-5.00 (m, 2H), 3.71 (s, 3H), 2.77-2.65 (m, 4H), 2.38 (t, *J* = 8.1 Hz, 1H), 0.85 (m, 1H), 0.54 (ddd, *J* = 10.4, 7.9, 2.7 Hz, 1H), 0.46 (ddd, *J* = 10.3, 7.9, 2.8 Hz, 1H), 0.17-0.11 (m, 2H) ppm. **<sup>13</sup>C NMR** (100 MHz, CDCl<sub>3</sub>): δ 168.8, 141.5, 139.6, 138.3, 135.4, 128.5 (overlap), 128.3 (overlap), 125.9, 114.8, 51.4, 51.2, 35.7, 31.4, 14.2, 4.6, 4.0 ppm. **FT-IR** (KBr): 2957, 2925, 2854, 1719, 1457, 1260, 1087, 1018, 799 cm<sup>-1</sup>. **HRMS** (ESI<sup>+</sup>): *m/z* calcd for C<sub>18</sub>H<sub>23</sub>O<sub>2</sub> [M+H]<sup>+</sup> 271.1693, found 271.1691. [α]<sub>D</sub><sup>24.3</sup> = +11.40 (*c* = 0.10, CHCl<sub>3</sub>). **HPLC**: Daicel Chiralpak OJ-H, *n*-hexane/*i*-PrOH = 99.2/0.8, 0.20 mL/min, 20 °C, 230 nm; [t<sub>1</sub> (minor) = 12.531 min, t<sub>2</sub> (major) = 13.047 min], 96% *ee*.

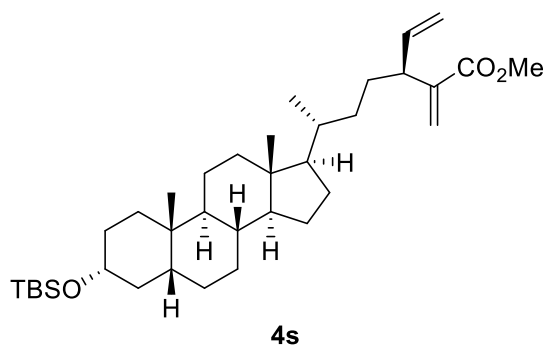

**R<sub>f</sub>** = 0.61 (petroleum ether/ethyl acetate 10/1). **<sup>1</sup>H NMR** (400 MHz, CDCl<sub>3</sub>): δ 6.18 (s, 1H), 5.74 (ddd, *J* = 16.8, 10.3, 8.1 Hz, 1H), 5.54 (s, 1H), 5.07-5.02 (m, 2H), 3.75 (s, 3H), 3.56 (m, 1H), 3.16 (td, *J* = 8.1, 5.6 Hz, 1H), 1.94 (m, 1H), 1.85-1.71 (m, 4H), 1.58-1.52 (m, 3H), 1.46-1.44 (m, 2H), 1.42-1.31 (m, 8H), 1.26-1.17 (m, 3H), 1.14 (m, 1H), 1.10-1.02 (m, 6H), 0.89 (s, 15H), 0.62 (s, 3H), 0.05 (s, 6H) ppm. **<sup>13</sup>C NMR** (100 MHz, CDCl<sub>3</sub>): δ 167.6, 143.7, 140.3, 123.9, 115.3, 72.9, 56.4, 56.2, 51.8, 45.1, 42.7, 42.3, 40.2, 40.1, 36.9, 35.9, 35.6, 35.5, 34.6, 33.5, 31.0, 30.2, 28.3, 27.3, 26.4, 26.0 (overlap), 24.2, 23.4, 20.8, 18.6, 18.4, 12.0, -4.6 (overlap) ppm. **FT-IR** (KBr): 2960, 2944, 2926, 2854, 1468, 1369, 1261, 1093, 1021, 950, 908, 870, 835, 803, 773 cm<sup>-1</sup>. **HRMS** (ESI<sup>+</sup>): *m/z* calcd for C<sub>36</sub>H<sub>62</sub>O<sub>3</sub>SiNa [M+Na]<sup>+</sup> 593.4360, found 593.4363. [α]<sub>D</sub><sup>25.0</sup> = +38.46 (*c* = 0.26, CHCl<sub>3</sub>). **<sup>1</sup>H NMR** analysis of the product **4s** showed the *dr* > 40:1. **m.p.** 64-66 °C.

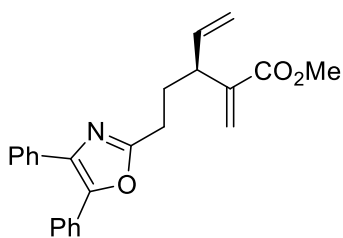

**4t**

$R_f$  = 0.41 (petroleum ether/ethyl acetate 10/1).  $^1\text{H NMR}$  (400 MHz,  $\text{CDCl}_3$ ):  $\delta$  7.76-7.49 (m, 4H), 7.42-7.25 (m, 6H), 6.27 (s, 1H), 5.84 (ddd,  $J$  = 17.7, 10.2, 8.0 Hz, 1H), 5.64 (s, 1H), 5.25-4.92 (m, 2H), 3.74 (s, 3H), 3.40 (q,  $J$  = 7.6 Hz, 1H), 2.95-2.75 (m, 2H), 2.29-1.98 (m, 2H) ppm.  $^{13}\text{C NMR}$  (100 MHz,  $\text{CDCl}_3$ ):  $\delta$  167.1, 163.1, 145.1, 142.4, 139.1, 135.1, 132.6, 129.1, 128.6 (overlap), 128.5 (overlap), 128.3, 128.0 (overlap), 127.9 (overlap), 126.4, 124.9, 116.3, 51.9, 44.7, 30.8, 26.3 ppm. **FT-IR** (KBr): 3060, 1722, 1625, 1605, 1572, 1502, 1484, 1441, 1258, 1195, 1142, 1060, 1025, 993, 961, 919, 818, 764, 695  $\text{cm}^{-1}$ . **HRMS** (ESI<sup>+</sup>):  $m/z$  calcd for  $\text{C}_{24}\text{H}_{24}\text{NO}_3$   $[\text{M}+\text{H}]^+$  374.1751, found 374.1758.  $[\alpha]_D^{20.0} = +10.39$  ( $c$  = 0.77,  $\text{CHCl}_3$ ). **HPLC**: Daicel Chiralpak AD-H, *n*-hexane/*i*-PrOH = 95/5, 1.00 mL/min, 25 °C, 210 nm;  $[t_1$  (minor) = 7.636 min,  $t_2$  (major) = 8.442 min], 94% *ee*.

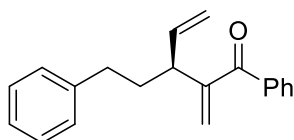

**4u**

$R_f$  = 0.45 (petroleum ether/ethyl acetate 15/1).  $^1\text{H NMR}$  (400 MHz,  $\text{CDCl}_3$ ):  $\delta$  7.81-7.71 (m, 2H), 7.57-7.50 (m, 1H), 7.43 (t,  $J$  = 7.6 Hz, 2H), 7.34-7.23 (m, 2H), 7.20-7.10 (m, 3H), 5.95-5.83 (m, 1H), 5.82 (s, 1H), 5.62 (s, 1H), 5.28-5.03 (m, 2H), 3.52 (td,  $J$  = 8.4, 5.7 Hz, 1H), 2.80-2.67 (m, 1H), 2.66-2.55 (m, 1H), 2.03-1.93 (m, 1H), 1.92-1.80 (m, 1H) ppm.  $^{13}\text{C NMR}$  (100 MHz,  $\text{CDCl}_3$ ):  $\delta$  198.0, 150.5, 142.1, 139.5, 137.9, 132.4, 129.6 (overlap), 128.4 (overlap), 128.4 (overlap), 128.2 (overlap), 125.8, 124.4, 116.3, 45.1, 35.3, 33.8 ppm. **FT-IR** (KBr): 3062, 3026, 2927, 1658, 1598, 1495, 1450, 1411, 1266, 1160, 981, 921, 750, 699  $\text{cm}^{-1}$ . **HRMS** (ESI<sup>+</sup>):  $m/z$  calcd for  $\text{C}_{20}\text{H}_{21}\text{O}$   $[\text{M}+\text{H}]^+$  277.1587, found 277.1592.  $[\alpha]_D^{25.0} = +24.53$  ( $c$  = 0.19,  $\text{CHCl}_3$ ). **HPLC**: Daicel Chiralpak AD-H, *n*-hexane/*i*-PrOH = 99/1, 1.00 mL/min, 25 °C, 210 nm;  $[t_1$  (major) = 8.009 min,  $t_2$  (minor) = 8.557 min], 89% *ee*.

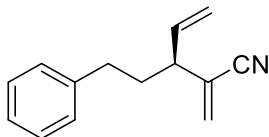

**4v**

$R_f$  = 0.42 (petroleum ether/ethyl acetate 20/1).  $^1\text{H NMR}$  (400 MHz,  $\text{CDCl}_3$ ):  $\delta$  7.35-7.25 (m, 2H), 7.24-7.13 (m, 3H), 5.91 (s, 1H), 5.86-5.70 (m, 2H), 5.40-5.06 (m, 2H), 2.90 (q,  $J$  = 7.5 Hz, 1H), 2.63 (t,  $J$  = 7.5 Hz, 2H), 2.06-1.94 (m, 1H), 1.93-1.80 (m, 1H) ppm.  $^{13}\text{C NMR}$  (100 MHz,  $\text{CDCl}_3$ ):  $\delta$  141.0, 137.0, 130.3, 128.5 (overlap), 128.4 (overlap), 126.1, 126.1, 117.7 (overlap), 47.7, 34.2, 33.0 ppm. **FT-IR** (KBr): 3084, 3028, 2926, 2859, 2222, 1604, 1496, 1454, 993, 930, 751, 700  $\text{cm}^{-1}$ . **HRMS** ( $\text{ESI}^+$ ):  $m/z$  calcd for  $\text{C}_{14}\text{H}_{16}\text{N}$   $[\text{M}+\text{H}]^+$  198.1277, found 198.1276.  $[\alpha]_{\text{D}}^{25.0} = +5.32$  ( $c$  = 0.65,  $\text{CHCl}_3$ ). **HPLC**: Daicel Chiralpak OD-H, *n*-hexane/*i*-PrOH = 99.3/0.7, 1.00 mL/min, 25 °C, 210 nm;  $[t_1$  (major) = 12.367 min,  $t_2$  (minor) = 14.028 min], 94% *ee*.

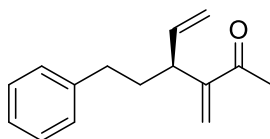

**4w**

$R_f$  = 0.58 (petroleum ether/ethyl acetate 15/1).  $^1\text{H NMR}$  (400 MHz,  $\text{CDCl}_3$ ):  $\delta$  7.30-7.25 (m, 2H), 7.20-7.10 (m, 3H), 6.08 (s, 1H), 5.85-5.72 (m, 2H), 5.12-5.00 (m, 2H), 3.43 (q,  $J$  = 7.5 Hz, 1H), 2.70-2.58 (m, 1H), 2.57-2.45 (m, 1H), 2.32 (s, 3H), 1.86-1.74 (m, 2H) ppm.  $^{13}\text{C NMR}$  (100 MHz,  $\text{CDCl}_3$ ):  $\delta$  199.1, 151.5, 142.2, 140.3, 128.4 (overlap), 128.4 (overlap), 125.8, 124.7, 115.5, 42.8, 35.8, 33.8, 26.3 ppm. **FT-IR** (KBr): 3082, 3027, 2928, 1679, 1637, 1496, 1454, 1362, 1257, 917, 750, 700  $\text{cm}^{-1}$ . **HRMS** ( $\text{ESI}^+$ ):  $m/z$  calcd for  $\text{C}_{15}\text{H}_{19}\text{O}$   $[\text{M}+\text{H}]^+$  215.1430, found 215.1434.  $[\alpha]_{\text{D}}^{25.0} = +11.86$  ( $c$  = 0.29,  $\text{CHCl}_3$ ). **HPLC**: Daicel Chiralpak OD-H, *n*-hexane/*i*-PrOH = 99/1, 0.50 mL/min, 20 °C, 210 nm;  $[t_1$  (major) = 15.370 min,  $t_2$  (minor) = 16.305 min], 91% *ee*.

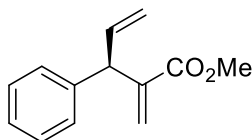

**4x**

$R_f$  = 0.50 (petroleum ether/ethyl acetate 40/1).  $^1\text{H NMR}$  (400 MHz,  $\text{CDCl}_3$ ):  $\delta$  7.38-7.26 (m, 2H), 7.25-7.12 (m, 3H), 6.35 (s, 1H), 6.09 (ddd,  $J$  = 17.1, 10.2, 6.8 Hz, 1H), 5.57 (s, 1H), 5.17 (d,  $J$  = 10.2 Hz, 1H), 4.94 (d,  $J$  = 17.1 Hz, 1H), 4.66 (d,  $J$  = 6.8 Hz, 1H), 3.67 (s, 3H) ppm.  $^{13}\text{C NMR}$  (100 MHz,  $\text{CDCl}_3$ ):  $\delta$  167.2, 142.5, 140.7, 138.9, 128.5 (overlap), 128.4 (overlap), 126.7, 126.3, 116.7, 52.0, 50.2 ppm. **HRMS** (EI):  $m/z$  calcd for  $\text{C}_{13}\text{H}_{14}\text{O}_2$   $[\text{M}]^+$  202.0988, found 202.0986.  $[\alpha]_{\text{D}}^{20.0} = -76.96$  ( $c$  = 0.65,  $\text{CHCl}_3$ ). **HPLC**: Daicel Chiralpak OJ-H, *n*-hexane/*i*-PrOH = 70/30, 0.5 mL/min, 20 °C, 230 nm;  $[t_1$  (major) 16.851 min,  $t_2$  (minor) = 20.059 min], 70% *ee*. Literature<sup>3</sup>  $[\alpha]_{\text{D}} +98.1$  ( $c$  0.5  $\text{CHCl}_3$ ) for an enantiomerically enriched sample of **ent-4x** with 90% *ee*.

## Derivatizations of products

### methyl (*R*)-2-methylene-3-((*S*)-oxiran-2-yl)-5-phenylpentanoate (**5**)

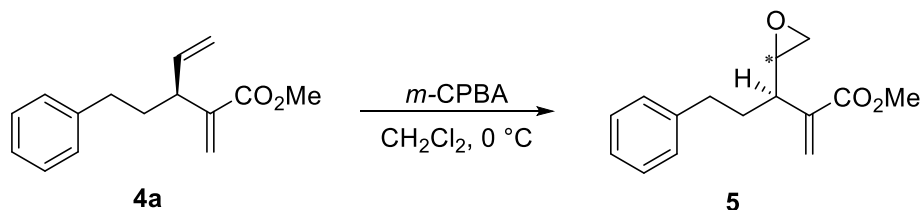

In an oven and vacuum-dried 10 mL round-bottom flask, **4a** (23 mg, 0.1 mmol, 1.0 equiv) was dissolved in dry  $\text{CH}_2\text{Cl}_2$  (1 mL, 0.1 M) and cooled to 0 °C. Then, the solution was added *m*-CPBA (60.4 mg, 3.5 equiv) and the resulting suspension was stirred at room temperature for 12 h. Then, the reaction mixture was quenched with saturated aqueous  $\text{Na}_2\text{S}_2\text{O}_3$  (3 mL), the organic phase was separated from the aqueous phase, and the aqueous phase was extracted with  $\text{CH}_2\text{Cl}_2$  (3 x 3 mL). The combined organic phase was washed with saturated aqueous  $\text{NaHCO}_3$  (3 mL) and brine, dried over anhydrous  $\text{Na}_2\text{SO}_4$ , and concentrated under reduced pressure. The crude reaction mixture was purified by silica-gel flash column chromatography (petroleum ether/ethyl acetate 20/1) to obtain **5** as a colorless oil (16 mg, 65%).  $^1\text{H}$  NMR analysis of product **5** showed the *dr* = 1.85:1.

$R_f$  = 0.19 (petroleum ether/ethyl acetate 40/1).  $^1\text{H}$  NMR (400 MHz,  $\text{CDCl}_3$ ):  $\delta$  7.34-7.22 (m, 3H), 7.20-7.14 (m, 5H), 6.35 (s, 1H), 6.34 (s, 1H), 5.70 (s, 1H), 5.67 (s, 1H), 3.77 (s, 5H), 3.16 (ddd,  $J$  = 6.7, 3.9, 2.7 Hz, 1H), 3.02 (ddd,  $J$  = 6.6, 4.1, 2.6 Hz, 1H), 2.79 (m, 1H), 2.71 (m, 1H), 2.68-2.61 (m, 3H), 2.55-2.52 (m, 2H), 2.50 (m, 1H), 2.45 (m, 1H), 2.11 (m, 1H), 2.02-1.84 (m, 2H) ppm.  $^{13}\text{C}$  NMR (100 MHz,  $\text{CDCl}_3$ ):  $\delta$  167.2, 167.1, 141.8, 141.6, 140.1, 139.6, 128.4 (overlap), 128.4 (overlap), 128.4 (overlap), 128.3 (overlap), 126.9, 126.2, 126.0, 125.9, 55.2, 53.9, 52.1, 52.0, 47.0, 46.0, 44.0, 43.6, 33.6, 33.5, 33.4, 32.6 ppm. HRMS ( $\text{ESI}^+$ ):  $m/z$  calcd for  $\text{C}_{15}\text{H}_{18}\text{O}_3\text{Na}$   $[\text{M}+\text{Na}]^+$  269.1148, found 269.1146.

### (*S*)-2-methyl-3-methylene-4-phenethylhex-5-en-2-ol (**6**)

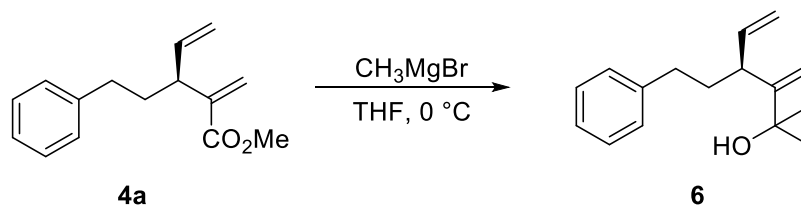

In a dried round bottom flask, **4a** (23 mg, 0.1 mmol, 1.0 equiv) was added, followed by dry THF (0.5 mL, 0.2 M) under an  $\text{N}_2$  atmosphere. The solution was cooled to 0 °C using ice bath. To the cooled mixture,  $\text{MeMgBr}$  (1 M solution in THF, 0.23 mL, 0.23 mmol, 2.3 equiv) was

added dropwise. Then, the reaction was allowed to warm to room temperature and stirred for 15 hours. The reaction was then poured into saturated aqueous  $\text{NH}_4\text{Cl}$  (2 mL) and extracted three times with EtOAc (3 x 5 mL). The combined organic phases were washed with brine, dried over anhydrous  $\text{Na}_2\text{SO}_4$ , filtered and concentrated, and purified via silica gel chromatography (petroleum ether/ethyl acetate 10/1) to afford the compound **6** as a colorless oil (16 mg, 72%).

$R_f$  = 0.33 (petroleum ether/ethyl acetate 10/1).  $^1\text{H NMR}$  (400 MHz,  $\text{CDCl}_3$ ):  $\delta$  7.42-7.26 (m, 2H), 7.18-7.08 (m, 3H), 5.74 (ddd,  $J$  = 17.3, 10.3, 8.3 Hz, 1H), 5.24 (s, 1H), 5.15-4.96 (m, 2H), 4.90 (s, 1H), 2.95 (m, 1H), 2.67 (dt,  $J$  = 15.1, 8.0 Hz, 1H), 2.57 (dt,  $J$  = 15.1, 7.7 Hz, 1H), 1.87-1.81 (m, 2H), 1.32 (s, 3H), 1.31 (s, 3H) ppm.  $^{13}\text{C NMR}$  (100 MHz,  $\text{CDCl}_3$ ):  $\delta$  158.3, 143.4, 142.3, 128.4 (overlap), 128.3 (overlap), 125.8, 114.2, 107.8, 73.9, 44.4, 38.0, 33.9, 29.1, 29.1 ppm. **HRMS** ( $\text{ESI}^+$ ):  $m/z$  calcd for  $\text{C}_{16}\text{H}_{22}\text{ONa}$   $[\text{M}+\text{Na}]^+$  253.1563, found 253.1565.  $[\alpha]_{\text{D}}^{25.0} = +40.7$  ( $c$  = 0.57,  $\text{CHCl}_3$ ).

**(S)-N-methoxy-N-methyl-2-methylene-3-phenethylpent-4-enamide (7)**

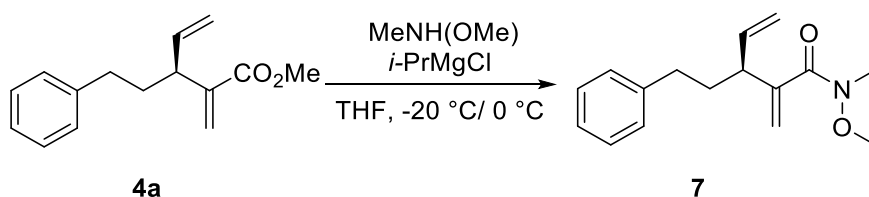

A solution of  $i\text{-PrMgCl}$  (2.0 M in THF, 0.1 mL, 0.2 mmol, 2.5 equiv) was added dropwise to a solution of **4a** (18 mg, 0.08 mmol, 1.0 equiv) and  $\text{MeNH(OMe)}\cdot\text{HCl}$  (8 mg, 0.096 mmol, 1.2 equiv) in dry THF (0.2 mL, 0.4 M) at  $-20\text{ }^\circ\text{C}$  under  $\text{N}_2$  atmosphere. The mixture was warmed slowly to  $0\text{ }^\circ\text{C}$  and stirred at  $0\text{ }^\circ\text{C}$  for 12 h. The reaction was then quenched with saturated aqueous  $\text{NH}_4\text{Cl}$  (2 mL), and the mixture was extracted with EtOAc (3 x 5 mL). The organic layers were combined, dried over anhydrous  $\text{Na}_2\text{SO}_4$ , and filtered. The resulting solution was concentrated *in vacuo*. Purification with column chromatography of the crude residue (petroleum ether/ethyl acetate 5/1) afforded the compound **7** as a colorless oil (12 mg, 60%).

$R_f$  = 0.14 (petroleum ether/ethyl acetate 10/1).  $^1\text{H NMR}$  (400 MHz,  $\text{CDCl}_3$ ):  $\delta$  7.35-7.23 (m, 2H), 7.19-7.15 (m, 3H), 5.75 (m, 1H), 5.34 (s, 1H), 5.27 (s, 1H), 5.21-5.03 (m, 2H), 3.62 (s, 3H), 3.22 (s, 3H), 3.14 (m, 1H), 2.70 (ddd,  $J$  = 15.2, 10.3, 5.7 Hz, 1H), 2.58 (ddd,  $J$  = 15.2, 10.7, 5.2 Hz, 1H), 2.00-1.91 (m, 1H), 1.82-1.73 (m, 1H) ppm.  $^{13}\text{C NMR}$  (100 MHz,  $\text{CDCl}_3$ ):  $\delta$  176.8, 146.9, 142.2, 139.2, 128.5 (overlap), 128.3 (overlap), 125.8, 116.7, 115.3, 61.1, 46.7, 34.7, 33.5, 29.7 ppm. **HRMS** ( $\text{ESI}^+$ ):  $m/z$  calcd for  $\text{C}_{16}\text{H}_{22}\text{NO}_2$   $[\text{M}+\text{H}]^+$  260.1645, found 260.1648.  $[\alpha]_{\text{D}}^{25.0} = +20.61$  ( $c$  = 0.33,  $\text{CHCl}_3$ ).

**dimethyl (*S*, *E*)-5-methylene-4-phenethylhex-2-enedioate (**8**)**

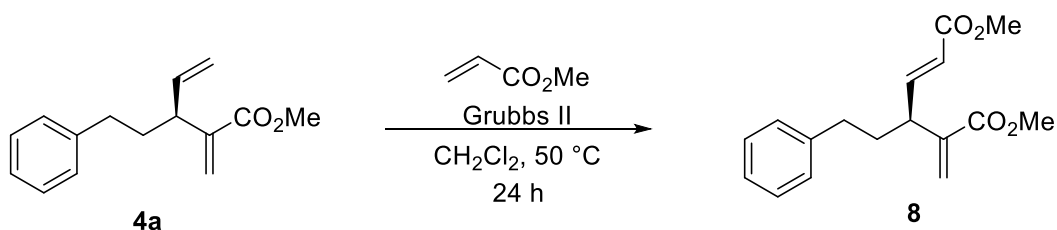

In a dried 10 mL 2-neck round-bottom flask equipped with a reflux condenser, **4a** (11.5 mg, 0.05 mmol, 1.0 equiv) and Grubbs II (2.2 mg, 0.05 equiv) were taken in 2.5 mL of dry CH<sub>2</sub>Cl<sub>2</sub> under argon and the resulting solution was heated to 50 °C. Then methyl acrylate (45 μL, 10.0 equiv) was added at once, and the resulting mixture was stirred at 50 °C for 24 h. Subsequently, the solvent was evaporated to obtain a yellow residue. The residue was purified by silica-gel flash column chromatography (petroleum ether/ethyl acetate 10/1) to obtain **8** as a colorless oil (8.4 mg, 58%).

$R_f = 0.28$  (petroleum ether/ethyl acetate 10/1). <sup>1</sup>H NMR (400 MHz, CDCl<sub>3</sub>): δ 7.28 (t,  $J = 7.4$  Hz, 2H), 7.21-7.14 (m, 3H), 6.95 (dd,  $J = 15.7, 8.3$  Hz, 1H), 6.32 (s, 1H), 5.87 (d,  $J = 15.7$  Hz, 1H), 5.64 (s, 1H), 3.75 (s, 3H), 3.73 (s, 3H), 3.45 (q,  $J = 7.7$  Hz, 1H), 2.72-2.48 (m, 2H), 2.06-1.83 (m, 2H) ppm. <sup>13</sup>C NMR (100 MHz, CDCl<sub>3</sub>): δ 166.9, 166.7, 149.7, 141.3, 141.2, 128.4 (overlap), 128.3 (overlap), 126.0, 126.0, 121.8, 52.1, 51.6, 43.1, 34.9, 33.5 ppm. HRMS (ESI<sup>+</sup>):  $m/z$  calcd for C<sub>17</sub>H<sub>21</sub>O<sub>4</sub> [M+H]<sup>+</sup> 289.1434, found 289.1433.  $[\alpha]_D^{23.8} = +39.67$  ( $c = 1.79$ , CHCl<sub>3</sub>).

**methyl (*R*)-3-ethyl-2-methylene-5-phenylpentanoate (**9**)**

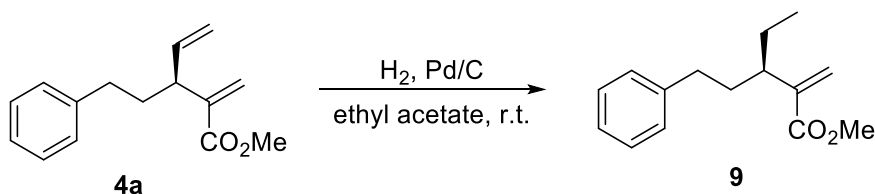

Compound **4a** (10 mg, 0.044 mmol, 1.0 equiv) was dissolved in dried ethyl acetate (440 μL, 0.1 M), and 10% Pd/C (2.3 mg, 0.05 equiv) was added. The reaction mixture was sparged with hydrogen and then stirred under hydrogen (1 atm) for 10 min at room temperature. The mixture was then filtered through a celite pad and washed with ethyl acetate. The filtrate was concentrated in *vacuo*, and the residue was purified by flash column chromatography on silica gel (petroleum ether/ethyl acetate 20/1) to afford **9** as a colorless oil (6.5 mg, 65%).

$R_f = 0.51$  (petroleum ether/ethyl acetate 15/1). <sup>1</sup>H NMR (400 MHz, CDCl<sub>3</sub>): δ 7.26 (t,  $J = 7.4$  Hz, 2H), 7.16 (t,  $J = 7.4$  Hz, 3H), 6.27 (s, 1H), 5.53 (s, 1H), 3.76 (s, 3H), 2.57-2.51 (m, 3H), 1.80 (q,  $J = 7.8$  Hz, 2H), 1.58-1.51 (m, 2H), 0.83 (t,  $J = 7.4$  Hz, 3H) ppm. <sup>13</sup>C NMR (100 MHz, CDCl<sub>3</sub>): δ 168.0, 143.4, 142.6, 128.3 (overlap), 128.2 (overlap), 125.7, 124.6, 51.8, 42.3, 35.7,

33.6, 27.0, 11.5 ppm. HRMS (ESI<sup>+</sup>):  $m/z$  calcd for C<sub>15</sub>H<sub>21</sub>O<sub>2</sub> [M+H]<sup>+</sup> 233.1536, found 233.1535.  $[\alpha]_D^{23.9} = -9.14$  ( $c = 0.58$ , CHCl<sub>3</sub>).

**(S)-3-methylene-4-phenethyltetrahydro-2H-pyran-2-one (11)**

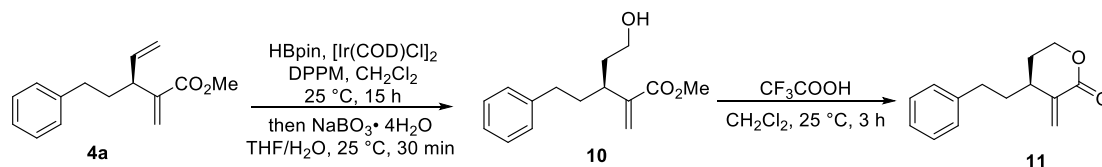

Step 1: In an oven and vacuum-dried 10 mL round-bottom flask, **4a** (23 mg, 0.1 mmol, 1.0 equiv) was taken along with [Ir(COD)Cl]<sub>2</sub> (2.2 mg, 3.2 mmol %), and DPPM (2.5 mg, 6.4 mmol %) under a positive argon pressure. Then 1.5 mL of dry CH<sub>2</sub>Cl<sub>2</sub> was added to it, followed by the addition of HBpin (48  $\mu$ L, 3.3 equiv), and the resulting solution was stirred at 25 °C for 15 h. Upon completion, the reaction mixture was concentrated under reduced pressure, and the residue was directly dissolved in 1.5 mL of (1:1) THF/H<sub>2</sub>O. Then, NaBO<sub>3</sub>·4H<sub>2</sub>O (92.3 mg, 6.0 equiv) was added to the reaction mixture, and the resulting suspension was stirred at 25 °C for 30 mins. Upon completion, the reaction was quenched with 1 mL of saturated NH<sub>4</sub>Cl solution and diluted with 1.5 mL of CH<sub>2</sub>Cl<sub>2</sub>. The organic layer was separated, and the aqueous layer was extracted with (2 x 3 mL) of CH<sub>2</sub>Cl<sub>2</sub>. The combined organic layers were dried over anhydrous Na<sub>2</sub>SO<sub>4</sub> and concentrated under reduced pressure to get a yellow oil. The residue was purified by silica-gel flash column chromatography (petroleum ether/ethyl acetate 3/1) to obtain **10** as a colorless oil (22 mg, 89%).

Step 2: In an oven-dried 10 mL round-bottom flask, **10** (22 mg, 0.089 mmol, 1.0 equiv) was taken in 4 mL of dry CH<sub>2</sub>Cl<sub>2</sub> under a positive argon pressure. To this, trifluoroacetic acid (88  $\mu$ L, 13.0 equiv) was added, and the reaction mixture was stirred at 25 °C for 3 h. Upon completion, the reaction was quenched with 6 mL of saturated NaHCO<sub>3</sub> solution and diluted with CH<sub>2</sub>Cl<sub>2</sub>. The organic layer was separated, and the aqueous phase was extracted with (2 x 8 mL) of CH<sub>2</sub>Cl<sub>2</sub>. Combined organic layers were washed with brine (8 mL), dried over anhydrous Na<sub>2</sub>SO<sub>4</sub>, and concentrated under reduced pressure. The residue was purified by silica-gel flash column chromatography (petroleum ether/ethyl acetate 5/1) to obtain **11** as a white solid (14 mg, 70%). **m.p.** 72-73 °C.

**11**:  $R_f = 0.45$  (petroleum ether/ethyl acetate 2/1). <sup>1</sup>H NMR (400 MHz, CDCl<sub>3</sub>):  $\delta$  7.36-7.25 (m, 2H), 7.23-7.17 (m, 3H), 6.46 (s, 1H), 5.60 (s, 1H), 4.46 (ddd,  $J = 10.9, 6.6, 4.0$  Hz, 1H), 4.28 (ddd,  $J = 10.9, 6.6, 4.0$  Hz, 1H), 2.75-2.61 (m, 3H), 2.17-2.10 (m, 1H), 2.01-1.92 (m, 1H), 1.84-1.73 (m, 2H) ppm. <sup>13</sup>C NMR (100 MHz, CDCl<sub>3</sub>)  $\delta$  141.2, 138.9, 128.6 (overlap), 128.3

(overlap), 127.5, 126.2, 67.0, 36.9, 35.8, 32.7, 28.1 ppm. **HRMS** (ESI<sup>+</sup>): *m/z* calcd for C<sub>14</sub>H<sub>17</sub>O<sub>2</sub> [M+H]<sup>+</sup> 217.1223, found 217.1218. [ $\alpha$ ]<sub>D</sub><sup>23.6</sup> = +32.31 (*c* = 0.13, CHCl<sub>3</sub>).

**Methyl (S)-2-methylene-5-oxo-3-phenethylpentanoate (12a) and methyl (R)-3-acetyl-2-methylene-5-phenylpentanoate (12b)**

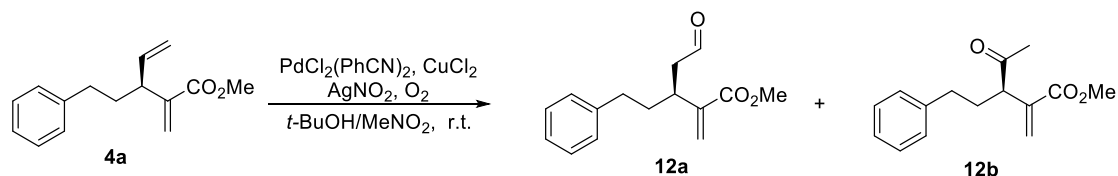

In a dried 10 mL round-bottom flask, PdCl<sub>2</sub>(PhCN)<sub>2</sub> (4.6 mg, 0.012 mmol, 0.12 equiv), CuCl<sub>2</sub> (1.7 mg, 0.012 mmol, 0.12 equiv), AgNO<sub>2</sub> (0.93 mg, 0.006 mmol, 0.06 equiv) were added. The round-bottom flask was evacuated and backfilled with an O<sub>2</sub> balloon. To this, **4a** (23 mg, 0.1 mmol, 1.0 equiv) was added as a solution in 2 mL of (16:1) t-BuOH/CH<sub>3</sub>NO<sub>2</sub> under positive oxygen pressure. The reaction mixture was then stirred at room temperature for 66 h under a balloon of O<sub>2</sub>. Then the reaction mixture was diluted with H<sub>2</sub>O (2 mL) and CH<sub>2</sub>Cl<sub>2</sub> (2 mL). The organic phase was separated, and the aqueous phase was extracted with CH<sub>2</sub>Cl<sub>2</sub> (3 x 5 mL). The combined organic layers were washed with brine, dried over anhydrous Na<sub>2</sub>SO<sub>4</sub>, and concentrated under reduced pressure. The residue was purified by silica-gel flash column chromatography (petroleum ether/ethyl acetate 20/1) to obtain **12a** and **12b** as a colorless oil (**11**: 11 mg, 45%; **12**: 10 mg, 40%).

**12a**: *R<sub>f</sub>* = 0.25 (petroleum ether/ethyl acetate 10/1). <sup>1</sup>H NMR (400 MHz, CDCl<sub>3</sub>) δ 9.68 (t, *J* = 2.0 Hz, 1H), 7.29-7.25 (m, 2H), 7.21-7.09 (m, 3H), 6.31 (s, 1H), 5.64 (s, 1H), 3.77 (s, 3H), 3.20 (m, 1H), 2.76-2.64 (m, 2H), 2.63-2.52 (m, 2H), 1.93 (ddt, *J* = 15.1, 8.9, 4.3 Hz, 1H), 1.82 (ddt, *J* = 15.1, 9.0, 4.5 Hz, 1H) ppm. <sup>13</sup>C NMR (100 MHz, CDCl<sub>3</sub>) δ 201.4, 167.0, 141.9, 141.5, 128.4 (overlap), 128.3 (overlap), 126.2, 126.0, 52.0, 48.4, 35.6, 35.6, 33.4 ppm. **HRMS** (ESI<sup>+</sup>): *m/z* calcd for C<sub>15</sub>H<sub>19</sub>O<sub>3</sub> [M+H]<sup>+</sup> 247.1329, found 247.1331. [ $\alpha$ ]<sub>D</sub><sup>25.0</sup> = -5.39 (*c* = 0.66, CHCl<sub>3</sub>).

**12b**: *R<sub>f</sub>* = 0.36 (petroleum ether/ethyl acetate 10/1). <sup>1</sup>H NMR (400 MHz, CDCl<sub>3</sub>) δ 7.33-7.24 (m, 2H), 7.23-7.12 (m, 3H), 6.41 (s, 1H), 5.70 (s, 1H), 3.78 (s, 3H), 3.64 (t, *J* = 7.2 Hz, 1H), 2.77-2.44 (m, 2H), 2.28-2.18 (m, 1H), 2.15 (s, 3H), 1.91-1.82 (m, 1H) ppm. <sup>13</sup>C NMR (100 MHz, CDCl<sub>3</sub>) δ 207.3, 166.9, 141.3, 138.5, 128.4 (overlap), 128.4 (overlap), 127.6, 126.1, 53.3, 52.3, 33.5, 31.9, 29.2 ppm. **HRMS** (ESI<sup>+</sup>): *m/z* calcd for C<sub>15</sub>H<sub>18</sub>O<sub>3</sub>Na [M+Na]<sup>+</sup> 269.1148, found 269.1147. [ $\alpha$ ]<sub>D</sub><sup>25.0</sup> = -30.95 (*c* = 0.46, CHCl<sub>3</sub>).

**(S)-2-methylene-3-phenethylpent-4-enal (14)**



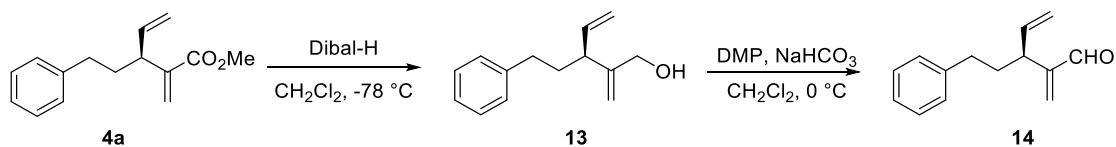

Step 1: To a solution of **4a** (23 mg, 0.1 mmol, 1.0 equiv) in dry  $\text{CH}_2\text{Cl}_2$  (0.5 mL, 0.2 M) was added dropwise diisobutylaluminum hydride (Dibal-H, 1.5 M in toluene, 0.16 mmol, 0.11 mL, 2.0 equiv) via syringe at  $-78\text{ }^\circ\text{C}$ . The reaction was stirred at  $-78\text{ }^\circ\text{C}$  for 30 min before it was diluted with ethyl ether and quenched with 5 mL of icy cold Rochelles salt (saturated Na/K tartrate). The mixture was allowed to room temperature and stirred for 30 min. The layers were separated, and the aqueous layer was extracted with ethyl acetate (3 x 3 mL). The organic layers were combined, dried over anhydrous  $\text{Na}_2\text{SO}_4$ , and concentrated *in vacuo*. The residue was purified by flash-column chromatography on silica gel (petroleum ether/ethyl acetate 5/1) to afford **13** as a colorless oil (20 mg, 95%).

Step 2: To a solution of **13** (20 mg, 0.1 mmol, 1.0 equiv) in  $\text{CH}_2\text{Cl}_2$  (3 mL, 0.03 M) was added  $\text{NaHCO}_3$  (17 mg, 0.2 mmol, 2.0 equiv) and Dess-Martin periodinane (49 mg, 0.15 mmol, 1.5 equiv) at  $0\text{ }^\circ\text{C}$ , then the reaction mixture was stirred at room temperature until the alcohol had disappeared thoroughly monitored by TLC. The reaction was then quenched with saturated aqueous  $\text{NaHCO}_3$  (1 mL) and saturated aqueous  $\text{Na}_2\text{S}_2\text{O}_3$  (1 mL). The mixture was allowed to stir at room temperature until the layers were separated. Then, the aqueous layer was extracted with ethyl acetate (3 x 5 mL). The combined organic phase was washed with brine, dried over anhydrous  $\text{Na}_2\text{SO}_4$ , filtered, and concentrated under reduced pressure. The residue was purified by flash-column chromatography on silica gel (petroleum ether/ethyl acetate 50/1) to afford **14** as a colorless oil (19 mg, 95%).

**14**:  $R_f = 0.41$  (petroleum ether/ethyl acetate 40/1).  $^1\text{H NMR}$  (400 MHz,  $\text{CDCl}_3$ )  $\delta$  9.54 (s, 1H), 7.2-7.25 (m, 2H), 7.21-7.12 (m, 3H), 6.27 (s, 1H), 6.06 (s, 1H), 5.81 (ddd,  $J = 17.6, 9.8, 8.0$  Hz, 1H), 5.31-4.91 (m, 2H), 3.31 (m, 1H), 2.64 (ddd,  $J = 13.8, 10.3, 5.7$  Hz, 1H), 2.53 (ddd,  $J = 13.8, 10.1, 6.0$  Hz, 1H), 1.91-1.80 (m, 2H) ppm.  $^{13}\text{C NMR}$  (100 MHz,  $\text{CDCl}_3$ )  $\delta$  194.0, 152.4, 141.9, 139.2, 134.2, 128.4 (overlap), 125.9, 116.0, 41.4, 35.2, 33.7 ppm. **HRMS** (ESI):  $m/z$  calcd for  $\text{C}_{14}\text{H}_{15}\text{O}$   $[\text{M}-\text{H}]^-$  199.1128, found 199.1132.  $[\alpha]_{\text{D}}^{25.0} = +7.45$  ( $c = 0.11$ ,  $\text{CHCl}_3$ ).

## References

1. Kim, S. W.; Schempp, T. T.; Zbieg, J. R.; Stivala, C. E.; Krische, M. J. Regio- and Enantioselective Iridium-Catalyzed N-Allylation of Indoles and Related Azoles with Racemic Branched Alkyl-Substituted Allylic Acetates. *Angew. Chem. Int. Ed.* **2019**, *58*, 7762-7766.
2. Han, S. B.; Han, H.; Krische, M. J. Diastereo- and Enantioselective anti-Alkoxyallylation Employing Allylic gem-Dicarboxylates as Allyl Donors via Iridium-Catalyzed Transfer Hydrogenation. *J. Am. Chem. Soc.* **2010**, *132*, 1760-1761.
3. Xu, Q.-L.; Dai, L.-X.; You, S.-L. Iridium-catalyzed enantioselective allylic alkylation of methyl 2-(4-nitrophenylsulfonyl)acetate and subsequent transformations. *Adv. Synth. Catal.* **2012**, *354*, 2275-2282.

## HPLC data

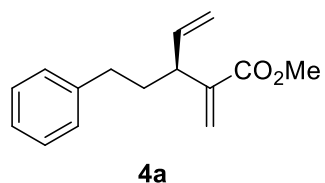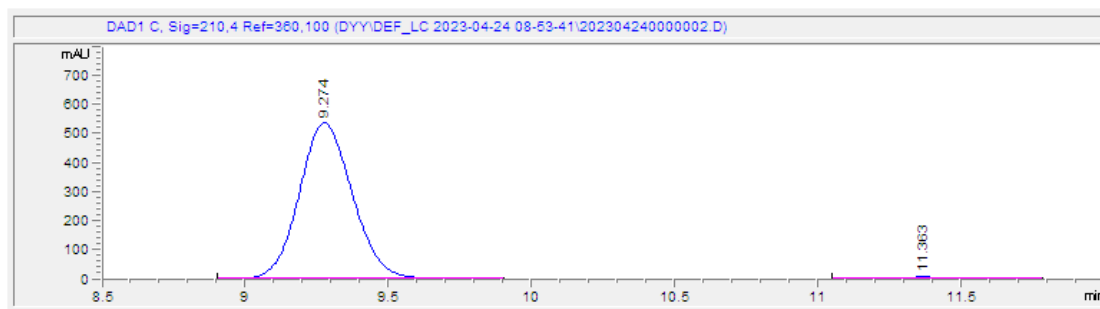

| # | Time   | Area   | Height | Width  | Area%  | Symmetry |
|---|--------|--------|--------|--------|--------|----------|
| 1 | 9.274  | 6985.9 | 536.3  | 0.202  | 98.240 | 0.851    |
| 2 | 11.363 | 125.2  | 7.6    | 0.2527 | 1.760  | 0.99     |

## Racemic 4a:

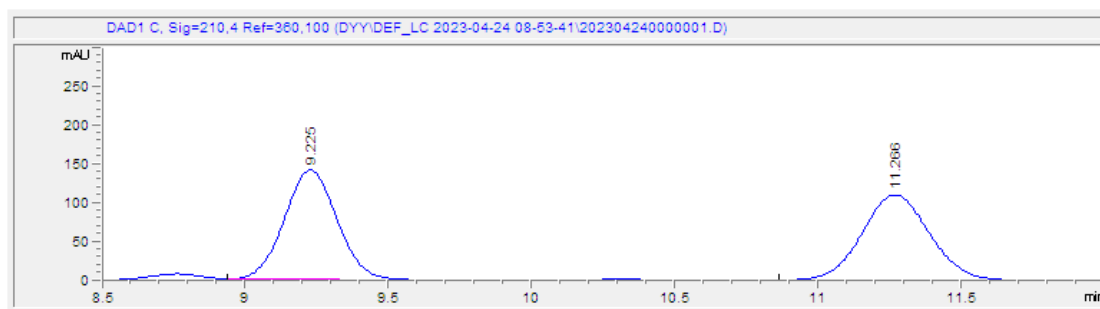

| # | Time   | Area   | Height | Width  | Area%  | Symmetry |
|---|--------|--------|--------|--------|--------|----------|
| 1 | 9.225  | 1850.1 | 142.2  | 0.1998 | 50.210 | 0.94     |
| 2 | 11.266 | 1834.6 | 110.7  | 0.2574 | 49.790 | 0.929    |

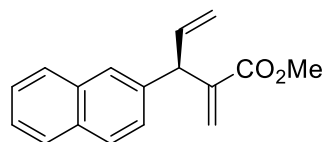

**4b**

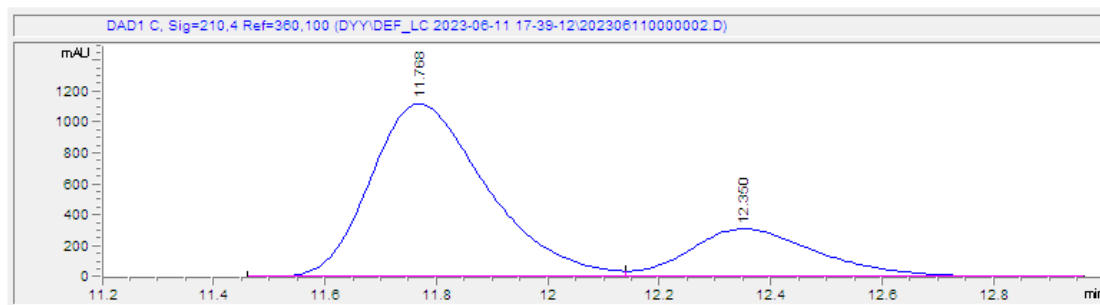

| # | Time   | Area    | Height | Width  | Area%  | Symmetry |
|---|--------|---------|--------|--------|--------|----------|
| 1 | 11.768 | 16348.4 | 1120.9 | 0.2242 | 76.357 | 0.682    |
| 2 | 12.35  | 5062.1  | 312.3  | 0.2451 | 23.643 | 0.688    |

**Racemic 4b:**

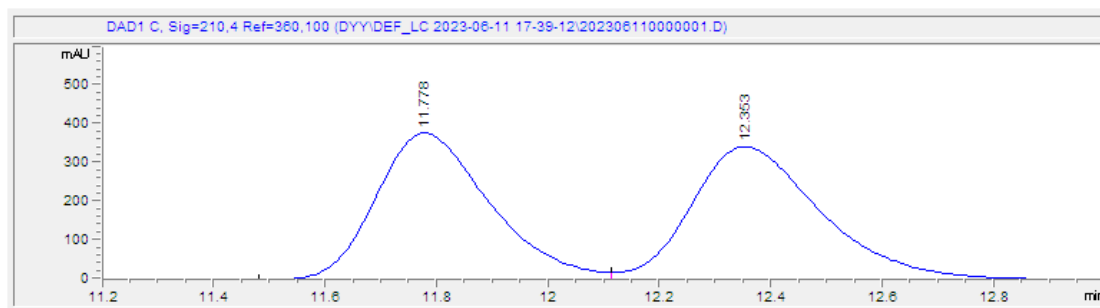

| # | Time   | Area   | Height | Width  | Area%  | Symmetry |
|---|--------|--------|--------|--------|--------|----------|
| 1 | 11.778 | 5404.9 | 379.1  | 0.2163 | 49.288 | 0.711    |
| 2 | 12.353 | 5561.1 | 343.9  | 0.2447 | 50.712 | 0.68     |

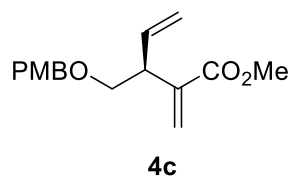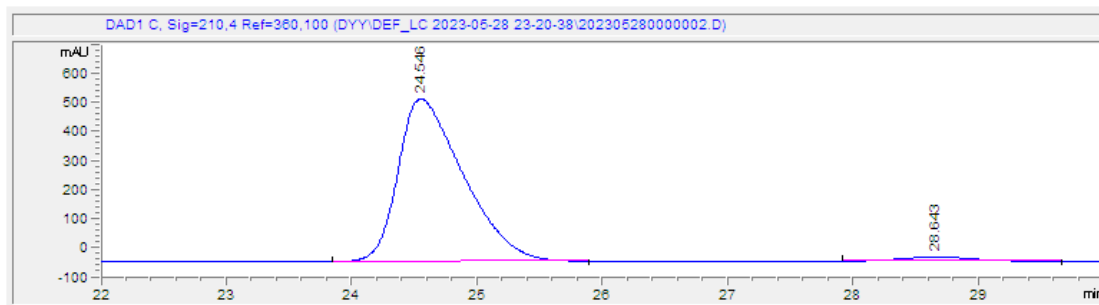

| # | Time   | Area    | Height | Width  | Area%  | Symmetry |
|---|--------|---------|--------|--------|--------|----------|
| 1 | 24.546 | 20226.8 | 558.8  | 0.5443 | 97.383 | 0.511    |
| 2 | 28.643 | 543.6   | 14.2   | 0.5388 | 2.617  | 0.963    |

**Racemic 4c:**

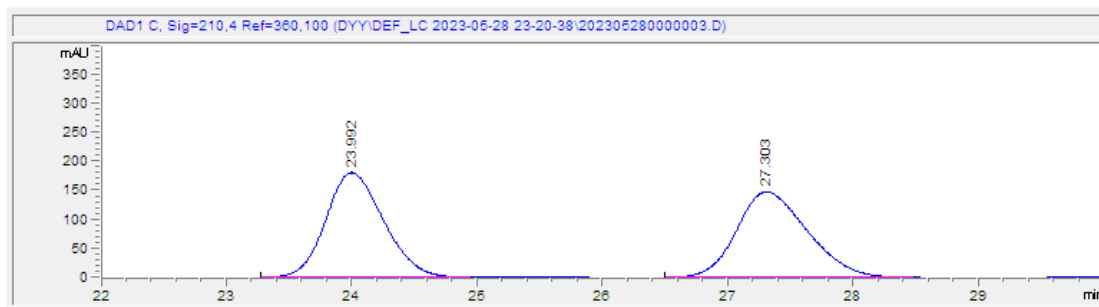

| # | Time   | Area   | Height | Width  | Area%  | Symmetry |
|---|--------|--------|--------|--------|--------|----------|
| 1 | 23.992 | 5798.8 | 180.8  | 0.4923 | 49.828 | 0.776    |
| 2 | 27.303 | 5839   | 148    | 0.6041 | 50.172 | 0.713    |

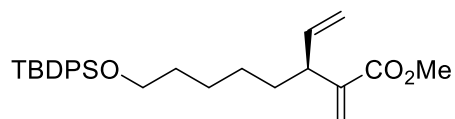

**4d**

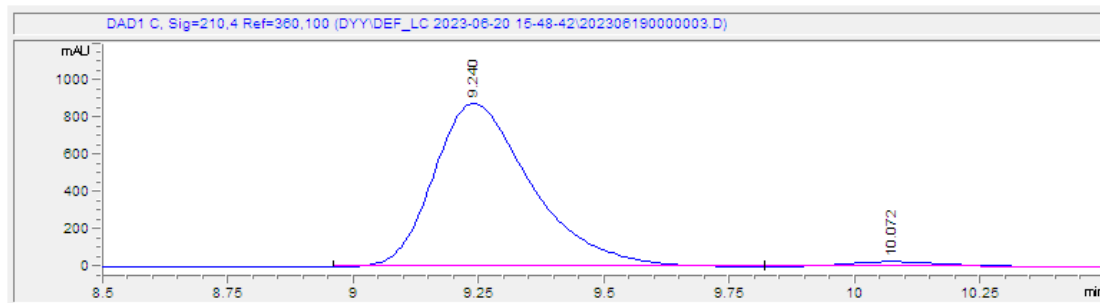

| # | Time   | Area  | Height | Width  | Area%  | Symmetry |
|---|--------|-------|--------|--------|--------|----------|
| 1 | 9.24   | 11959 | 878.9  | 0.2067 | 96.537 | 0.648    |
| 2 | 10.072 | 429   | 27.7   | 0.2306 | 3.463  | 0.692    |

**Racemic 4d:**

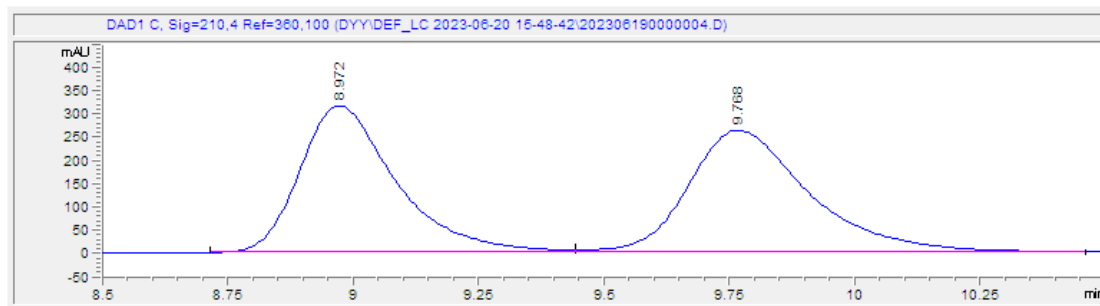

| # | Time  | Area   | Height | Width  | Area%  | Symmetry |
|---|-------|--------|--------|--------|--------|----------|
| 1 | 8.972 | 4214.3 | 315.4  | 0.1999 | 48.776 | 0.644    |
| 2 | 9.768 | 4425.9 | 262.4  | 0.2528 | 51.224 | 0.667    |

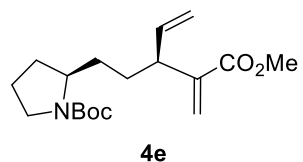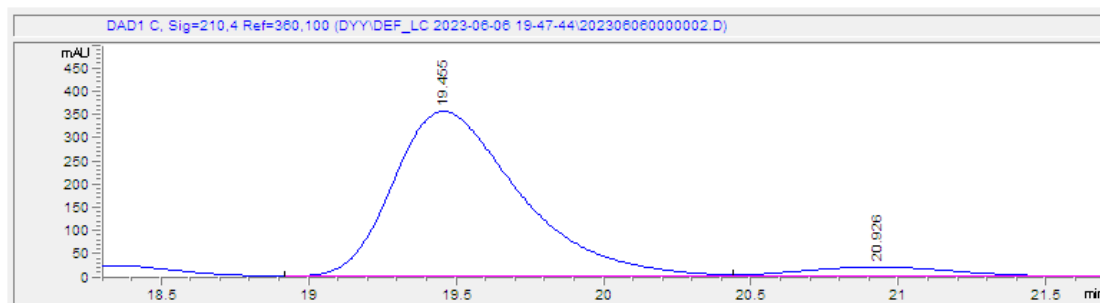

| # | Time   | Area    | Height | Width  | Area%  | Symmetry |
|---|--------|---------|--------|--------|--------|----------|
| 1 | 19.455 | 10719.4 | 356.6  | 0.4567 | 92.675 | 0.614    |
| 2 | 20.926 | 847.3   | 21.6   | 0.5987 | 7.325  | 0.867    |

**Racemic 4e:**

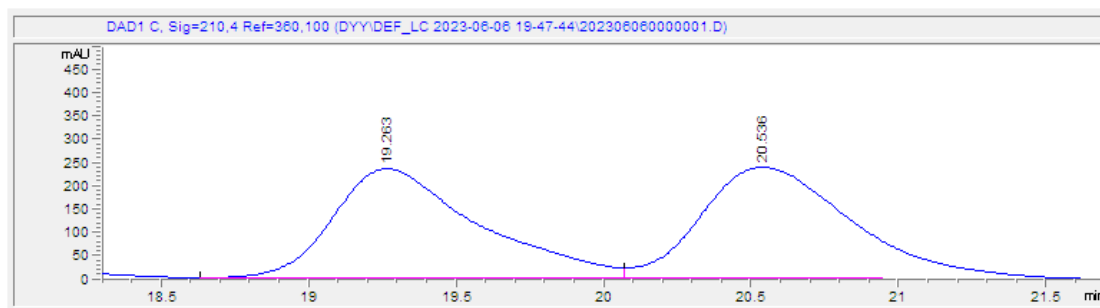

| # | Time   | Area   | Height | Width  | Area%  | Symmetry |
|---|--------|--------|--------|--------|--------|----------|
| 1 | 19.263 | 8221   | 236.5  | 0.5036 | 48.765 | 0.559    |
| 2 | 20.536 | 8637.5 | 240.2  | 0.5495 | 51.235 | 0.654    |

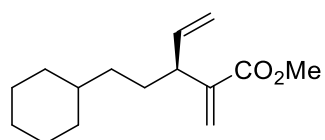

**4f**

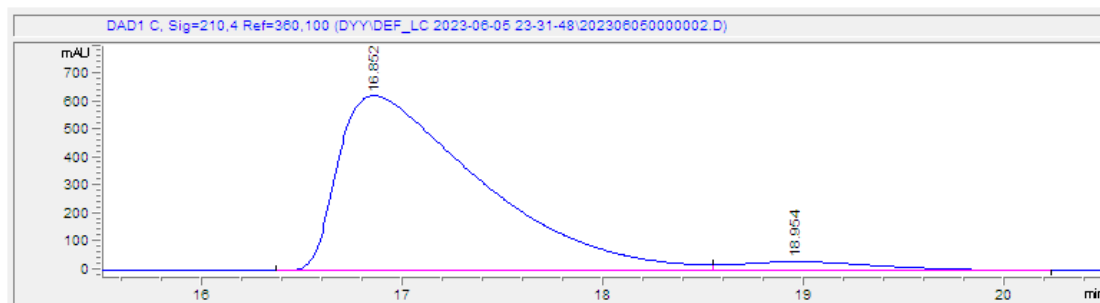

| # | Time   | Area   | Height | Width  | Area%  | Symmetry |
|---|--------|--------|--------|--------|--------|----------|
| 1 | 16.852 | 30994  | 626.1  | 0.7295 | 95.040 | 0.305    |
| 2 | 18.954 | 1617.5 | 32     | 0.7268 | 4.960  | 0.645    |

**Racemic 4f:**

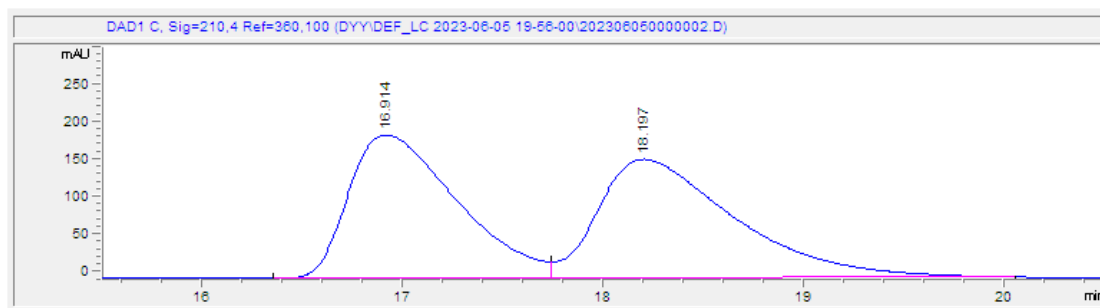

| # | Time   | Area   | Height | Width  | Area%  | Symmetry |
|---|--------|--------|--------|--------|--------|----------|
| 1 | 16.914 | 7157.5 | 190.8  | 0.5816 | 48.850 | 0.502    |
| 2 | 18.197 | 7494.6 | 157.9  | 0.7098 | 51.150 | 0.466    |



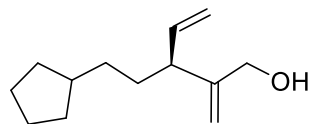

**4g'**

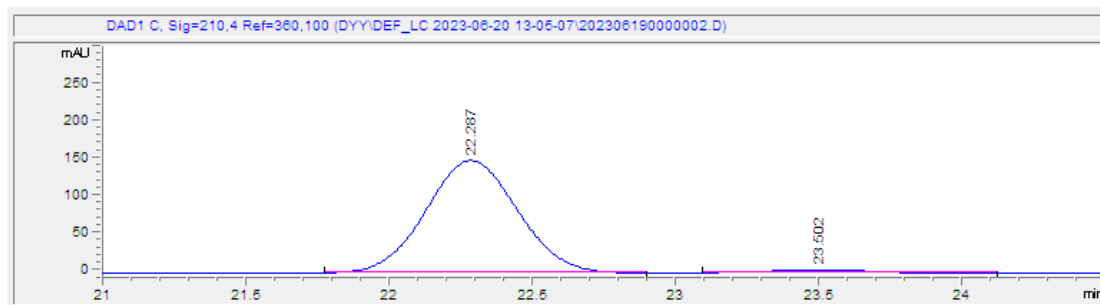

| # | Time   | Area   | Height | Width  | Area%  | Symmetry |
|---|--------|--------|--------|--------|--------|----------|
| 1 | 22.287 | 3346.1 | 150    | 0.3482 | 97.230 | 0.945    |
| 2 | 23.502 | 95.3   | 4.2    | 0.3587 | 2.770  | 1.075    |

**Racemic 4g':**

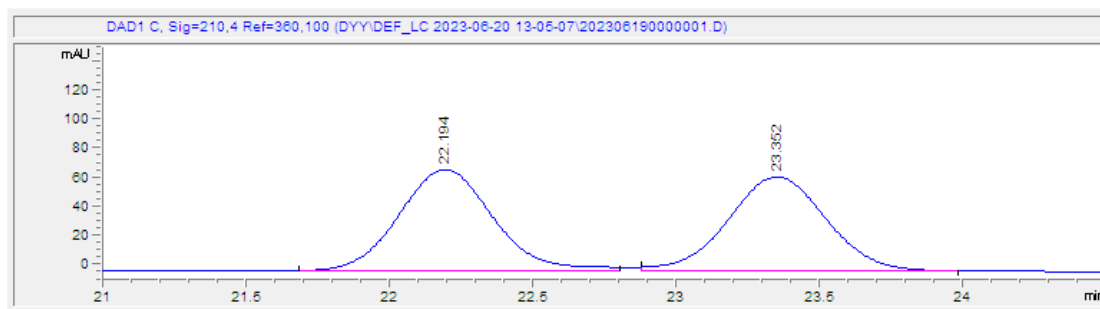

| # | Time   | Area   | Height | Width  | Area%  | Symmetry |
|---|--------|--------|--------|--------|--------|----------|
| 1 | 22.194 | 1611   | 69.7   | 0.3577 | 50.969 | 0.907    |
| 2 | 23.352 | 1549.8 | 64.7   | 0.3733 | 49.031 | 0.974    |

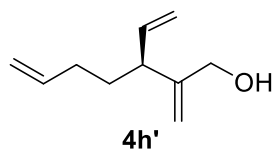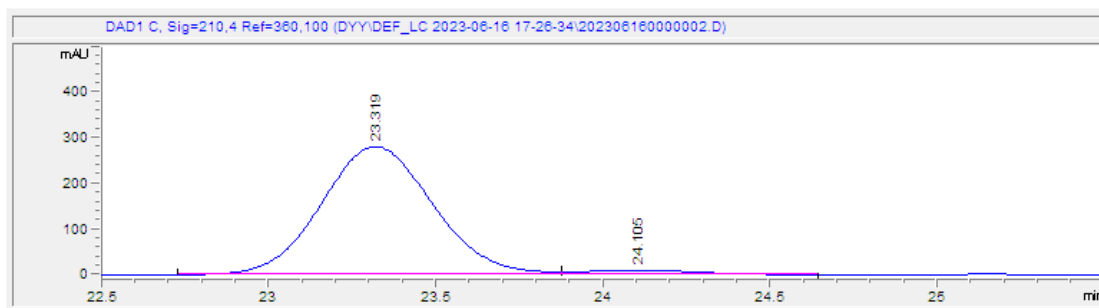

| # | Time   | Area   | Height | Width  | Area%  | Symmetry |
|---|--------|--------|--------|--------|--------|----------|
| 1 | 23.319 | 6545.3 | 280.3  | 0.3644 | 96.526 | 0.909    |
| 2 | 24.105 | 235.6  | 9.6    | 0.3661 | 3.474  | 0.838    |

**Racemic 4h':**

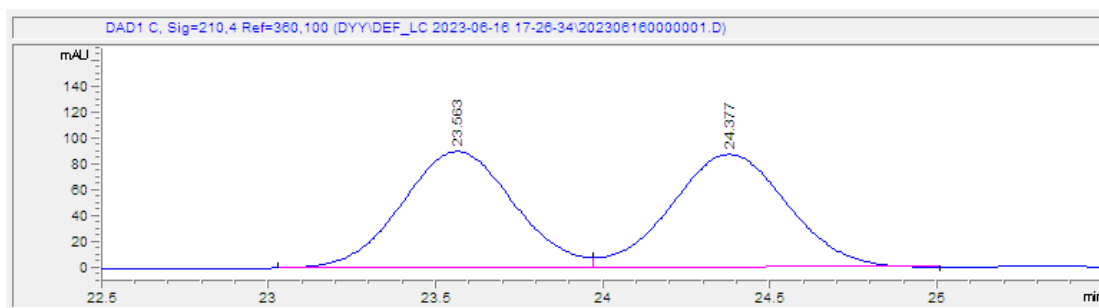

| # | Time   | Area   | Height | Width  | Area%  | Symmetry |
|---|--------|--------|--------|--------|--------|----------|
| 1 | 23.563 | 2105   | 90     | 0.3628 | 49.817 | 0.952    |
| 2 | 24.377 | 2120.5 | 87.3   | 0.3772 | 50.183 | 0.972    |

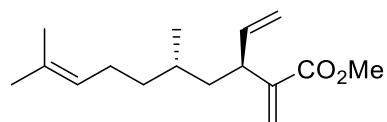

**4i**

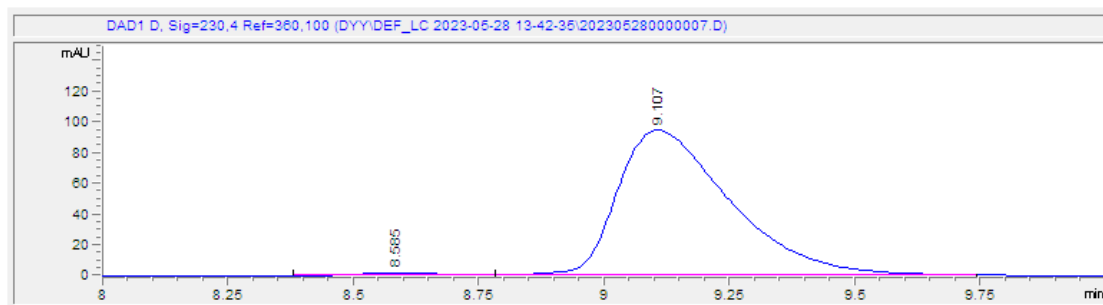

| # | Time  | Area | Height | Width  | Area%  | Symmetry |
|---|-------|------|--------|--------|--------|----------|
| 1 | 8.585 | 22.7 | 1.8    | 0.1948 | 1.500  | 0.704    |
| 2 | 9.107 | 1489 | 94.6   | 0.2376 | 98.500 | 0.524    |

**Racemic 4i:**

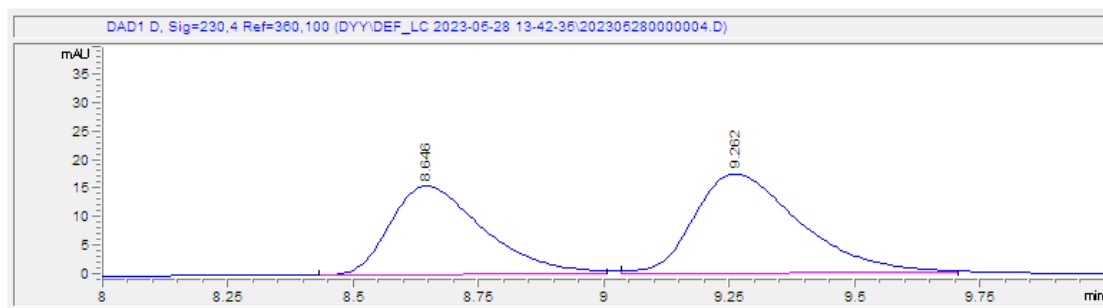

| # | Time  | Area  | Height | Width  | Area%  | Symmetry |
|---|-------|-------|--------|--------|--------|----------|
| 1 | 8.646 | 204.1 | 15.6   | 0.1983 | 43.917 | 0.588    |
| 2 | 9.262 | 260.6 | 17.6   | 0.2248 | 56.083 | 0.599    |

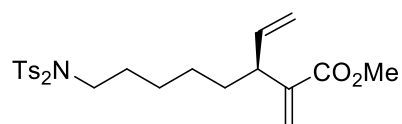

**4j**

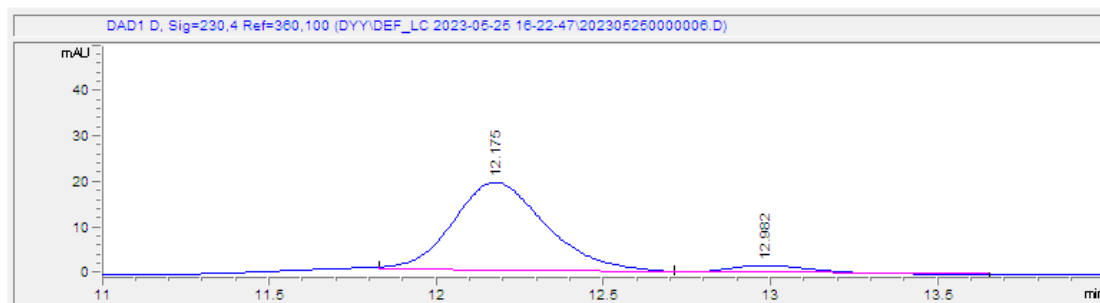

| # | Time   | Area | Height | Width  | Area%  | Symmetry |
|---|--------|------|--------|--------|--------|----------|
| 1 | 12.175 | 374  | 19.3   | 0.2981 | 93.599 | 0.798    |
| 2 | 12.982 | 25.6 | 1.6    | 0.2481 | 6.401  | 0.729    |

**Racemic 4j:**

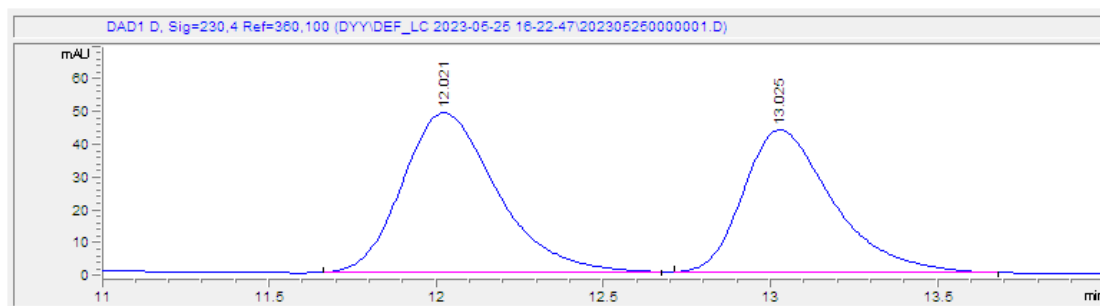

| # | Time   | Area  | Height | Width  | Area%  | Symmetry |
|---|--------|-------|--------|--------|--------|----------|
| 1 | 12.021 | 965.7 | 48.8   | 0.3031 | 54.128 | 0.741    |
| 2 | 13.025 | 818.4 | 43.6   | 0.2848 | 45.872 | 0.645    |

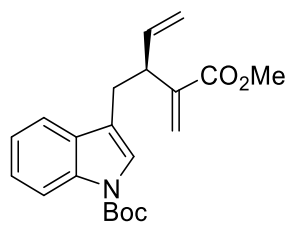

**4k**

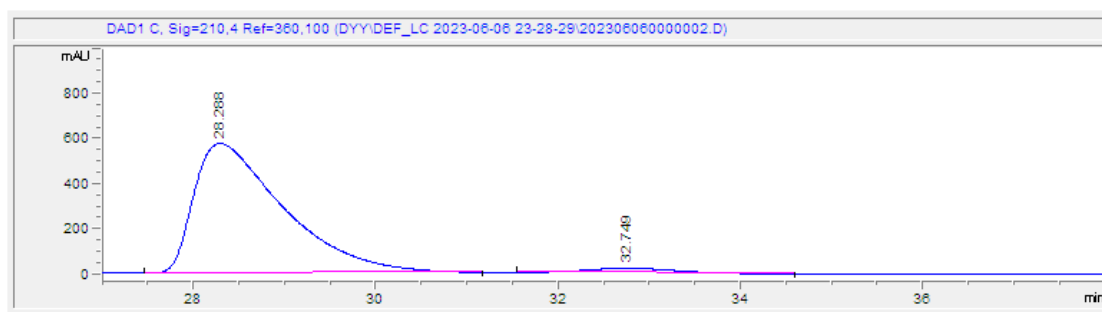

| # | Time   | Area    | Height | Width  | Area%  | Symmetry |
|---|--------|---------|--------|--------|--------|----------|
| 1 | 28.288 | 39187.8 | 573.7  | 0.9989 | 96.202 | 0.384    |
| 2 | 32.749 | 1546.9  | 21.9   | 0.9415 | 3.798  | 0.814    |

**Racemic 4k:**

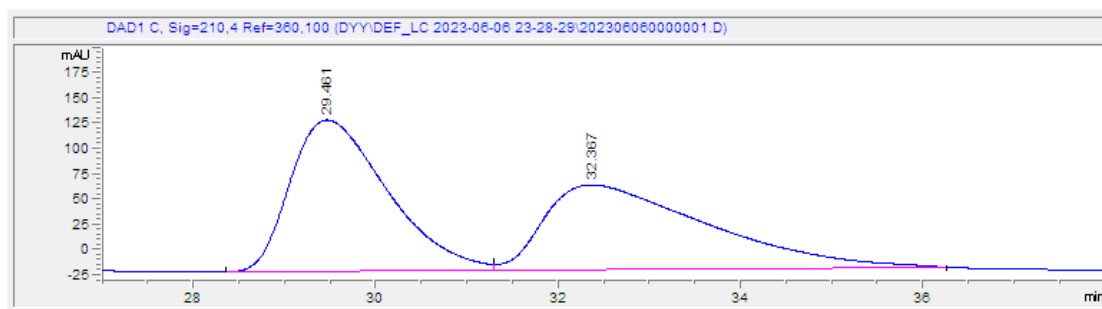

| # | Time   | Area    | Height | Width  | Area%  | Symmetry |
|---|--------|---------|--------|--------|--------|----------|
| 1 | 29.461 | 11112.9 | 149.8  | 1.1236 | 51.272 | 0.584    |
| 2 | 32.367 | 10561.6 | 84.1   | 1.7346 | 48.728 | 0.388    |

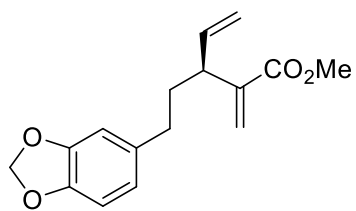

**4I**

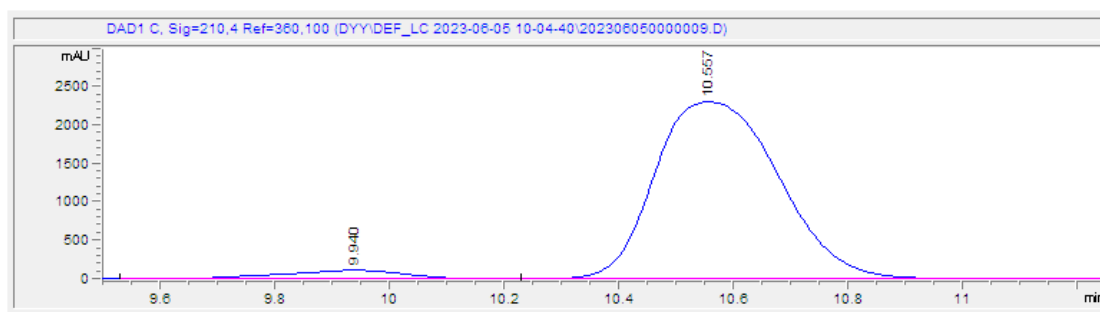

| # | Time   | Area    | Height | Width  | Area%  | Symmetry |
|---|--------|---------|--------|--------|--------|----------|
| 1 | 9.94   | 1717.2  | 113.9  | 0.2179 | 4.717  | 1.477    |
| 2 | 10.557 | 34685.2 | 2304.5 | 0.2416 | 95.283 | 0.733    |

**Racemic 4I:**

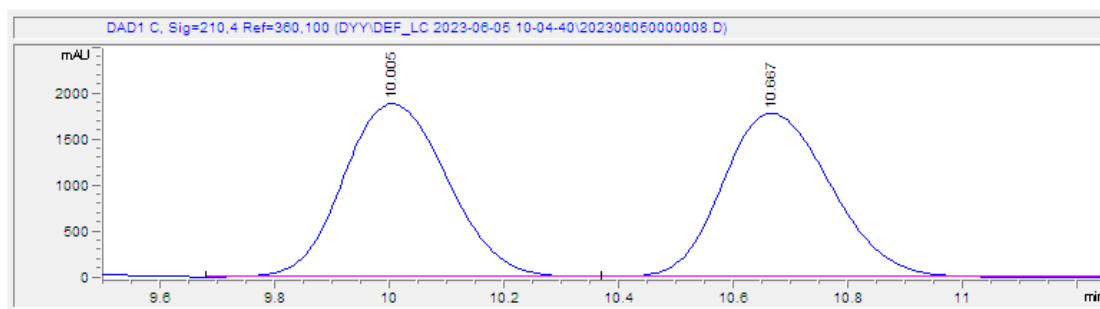

| # | Time   | Area    | Height | Width | Area%  | Symmetry |
|---|--------|---------|--------|-------|--------|----------|
| 1 | 10.005 | 24058.3 | 1883.5 | 0.203 | 50.425 | 0.853    |
| 2 | 10.667 | 23653.1 | 1779.9 | 0.209 | 49.575 | 0.79     |

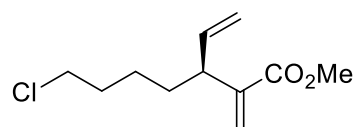

**4m**

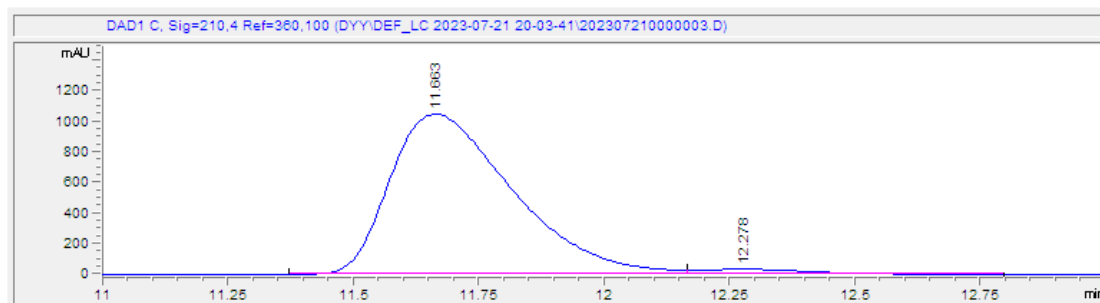

| # | Time   | Area    | Height | Width  | Area%  | Symmetry |
|---|--------|---------|--------|--------|--------|----------|
| 1 | 11.663 | 17870.1 | 1048.9 | 0.2628 | 97.212 | 0.545    |
| 2 | 12.278 | 512.5   | 33.2   | 0.2281 | 2.788  | 0.589    |

**Racemic 4m:**

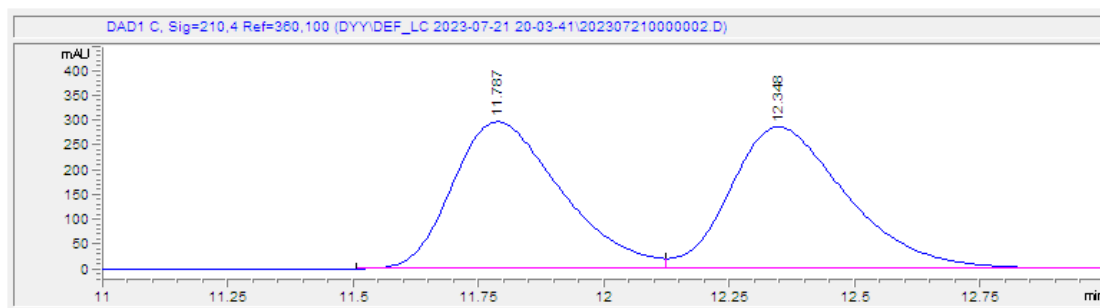

| # | Time   | Area   | Height | Width  | Area%  | Symmetry |
|---|--------|--------|--------|--------|--------|----------|
| 1 | 11.787 | 4467.2 | 296.4  | 0.2298 | 49.136 | 0.659    |
| 2 | 12.348 | 4624.2 | 285.4  | 0.247  | 50.864 | 0.67     |

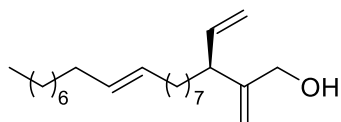

**4n'**

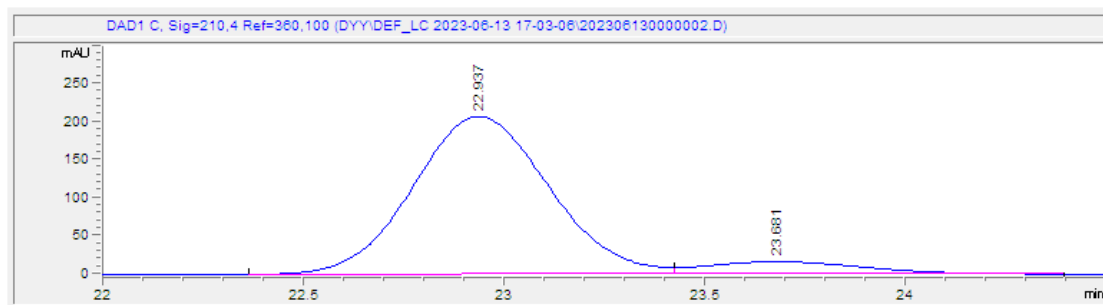

| # | Time   | Area   | Height | Width  | Area%  | Symmetry |
|---|--------|--------|--------|--------|--------|----------|
| 1 | 22.937 | 4926.7 | 207.6  | 0.3708 | 91.475 | 0.911    |
| 2 | 23.681 | 459.1  | 16.7   | 0.4039 | 8.525  | 0.755    |

**Racemic 4n':**

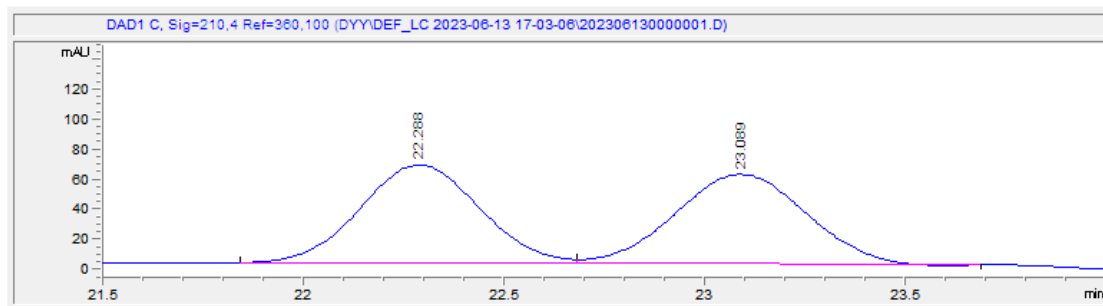

| # | Time   | Area   | Height | Width  | Area%  | Symmetry |
|---|--------|--------|--------|--------|--------|----------|
| 1 | 22.288 | 1370.5 | 65.6   | 0.3259 | 50.198 | 0.945    |
| 2 | 23.089 | 1359.7 | 59.9   | 0.355  | 49.802 | 0.988    |



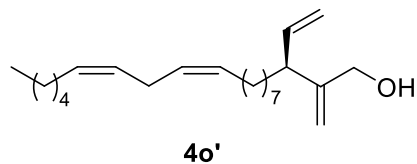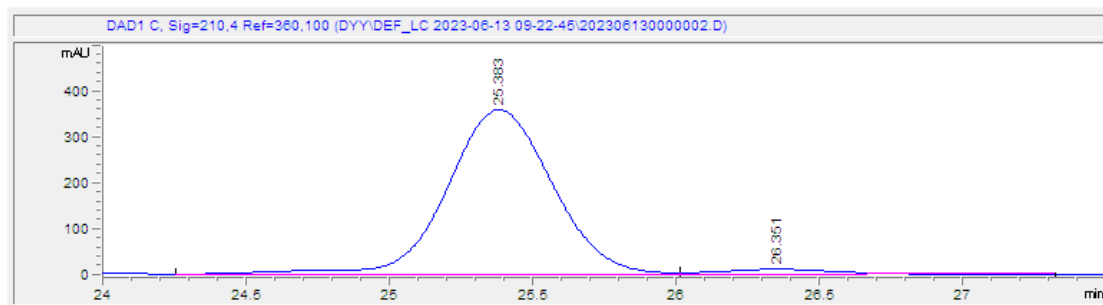

| # | Time   | Area   | Height | Width  | Area%  | Symmetry |
|---|--------|--------|--------|--------|--------|----------|
| 1 | 25.383 | 9240.5 | 358.5  | 0.3987 | 96.395 | 0.973    |
| 2 | 26.351 | 345.5  | 11.6   | 0.4436 | 3.605  | 0.796    |

### Racemic 4o':

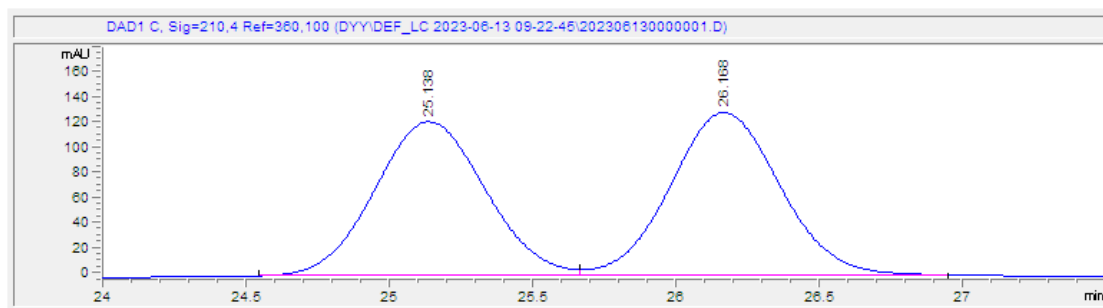

| # | Time   | Area   | Height | Width | Area%  | Symmetry |
|---|--------|--------|--------|-------|--------|----------|
| 1 | 25.138 | 3323   | 122.7  | 0.424 | 48.833 | 0.936    |
| 2 | 26.168 | 3481.8 | 129.8  | 0.417 | 51.167 | 0.933    |

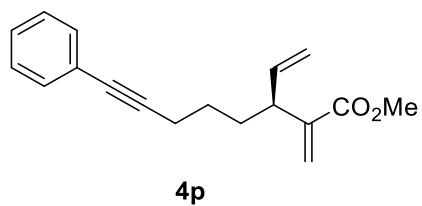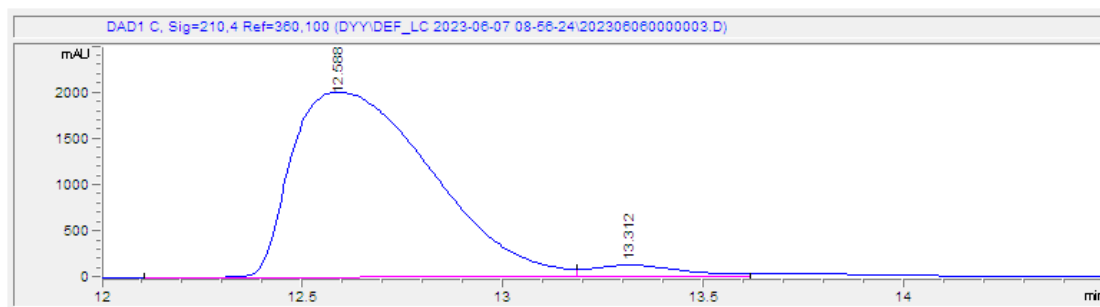

| # | Time   | Area    | Height | Width  | Area%  | Symmetry |
|---|--------|---------|--------|--------|--------|----------|
| 1 | 12.588 | 48975.6 | 2010.9 | 0.3961 | 95.486 | 0.468    |
| 2 | 13.312 | 2315.3  | 137.8  | 0.2421 | 4.514  | 0.583    |

**Racemic 4p:**

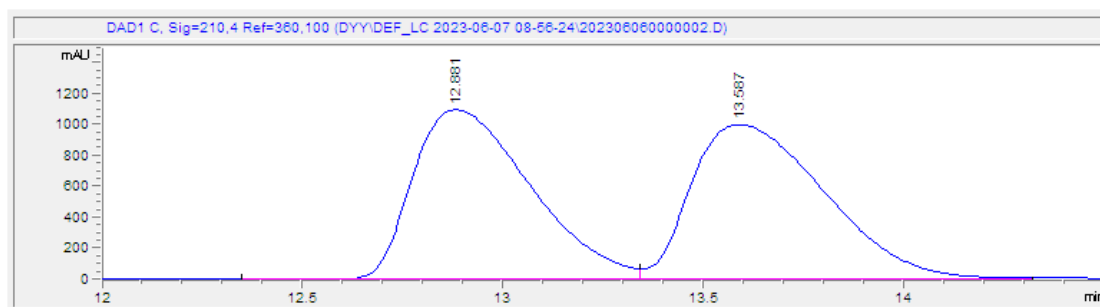

| # | Time   | Area    | Height | Width  | Area%  | Symmetry |
|---|--------|---------|--------|--------|--------|----------|
| 1 | 12.881 | 22494.3 | 1099.3 | 0.3247 | 49.085 | 0.557    |
| 2 | 13.587 | 23333.2 | 1003.2 | 0.3754 | 50.915 | 0.535    |

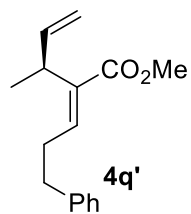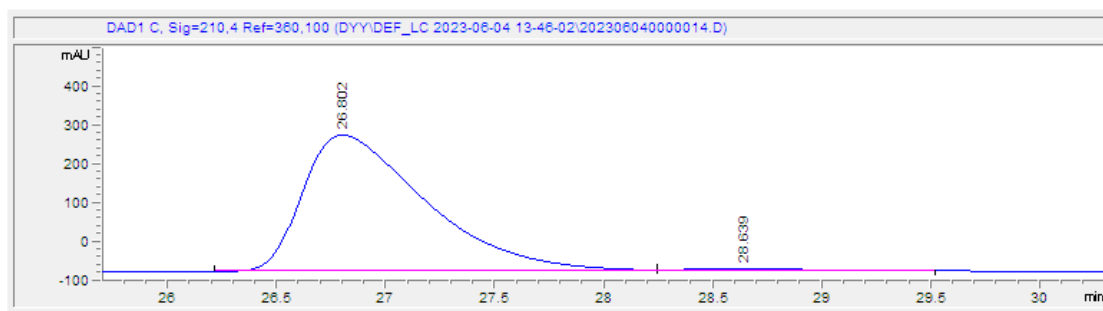

| # | Time   | Area    | Height | Width  | Area%  | Symmetry |
|---|--------|---------|--------|--------|--------|----------|
| 1 | 26.802 | 13832.2 | 351.2  | 0.5955 | 98.172 | 0.449    |
| 2 | 28.639 | 257.5   | 6.7    | 0.5589 | 1.828  | 0.876    |

**Racemic 4q':**

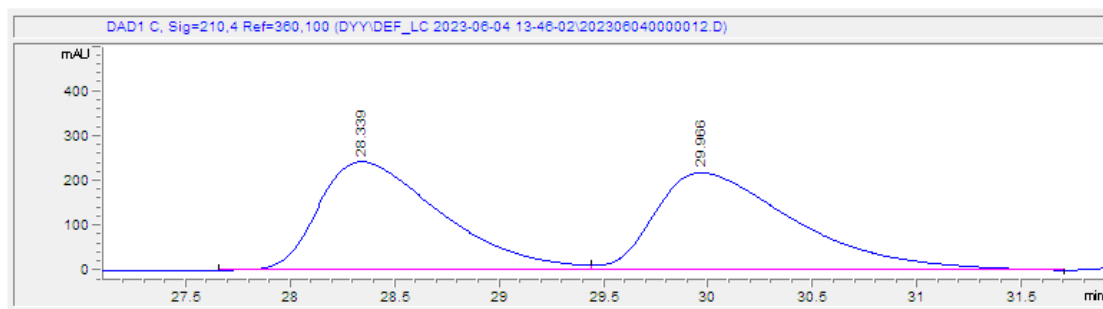

| # | Time   | Area    | Height | Width  | Area%  | Symmetry |
|---|--------|---------|--------|--------|--------|----------|
| 1 | 28.339 | 9975.6  | 242.7  | 0.6274 | 49.314 | 0.503    |
| 2 | 29.966 | 10253.3 | 217.9  | 0.7169 | 50.686 | 0.471    |

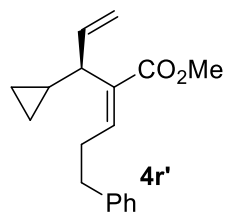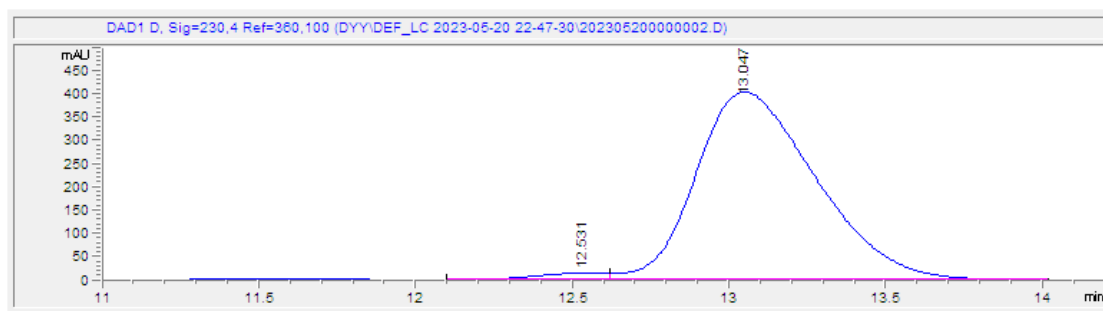

| # | Time   | Area    | Height | Width  | Area%  | Symmetry |
|---|--------|---------|--------|--------|--------|----------|
| 1 | 12.531 | 224.8   | 14.2   | 0.2449 | 2.049  | 2.176    |
| 2 | 13.047 | 10747.1 | 403.3  | 0.4109 | 97.951 | 0.65     |

### Racemic 4r':

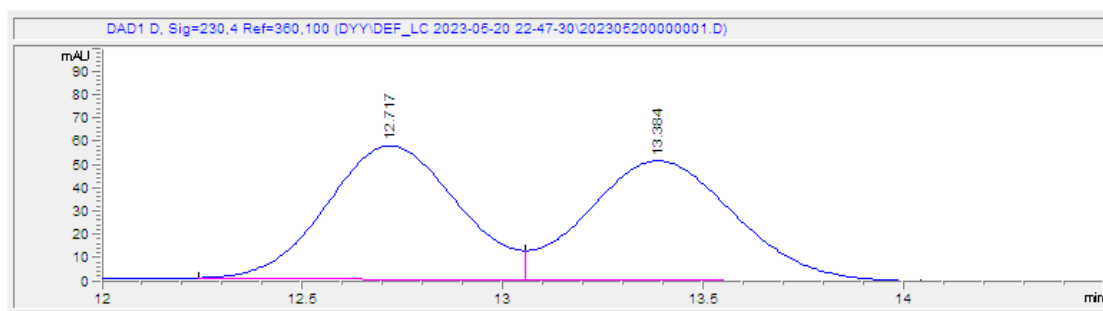

| # | Time   | Area   | Height | Width  | Area%  | Symmetry |
|---|--------|--------|--------|--------|--------|----------|
| 1 | 12.717 | 1317   | 57.4   | 0.3557 | 49.914 | 0.918    |
| 2 | 13.384 | 1321.5 | 51.4   | 0.396  | 50.086 | 0.888    |

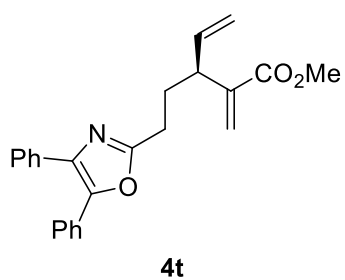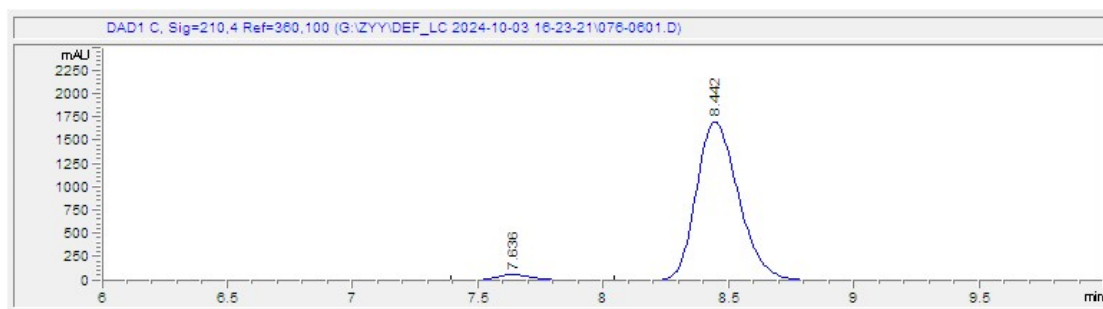

| # | Time  | Area    | Height | Width  | Area%  | Symmetry |
|---|-------|---------|--------|--------|--------|----------|
| 1 | 7.636 | 644.8   | 62     | 0.1594 | 3.132  | 0.818    |
| 2 | 8.442 | 19946.2 | 1699.7 | 0.1829 | 96.868 | 0.756    |

**Racemic 4t:**

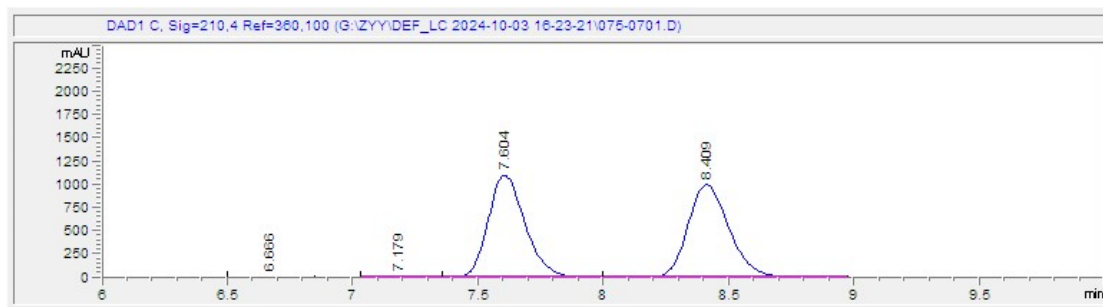

| # | Time  | Area    | Height | Width  | Area%  | Symmetry |
|---|-------|---------|--------|--------|--------|----------|
| 1 | 7.604 | 11266.4 | 1104.2 | 0.157  | 49.765 | 0.769    |
| 2 | 8.409 | 11372.7 | 1000.9 | 0.1746 | 50.235 | 0.79     |

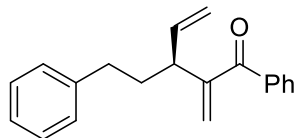

**4u**

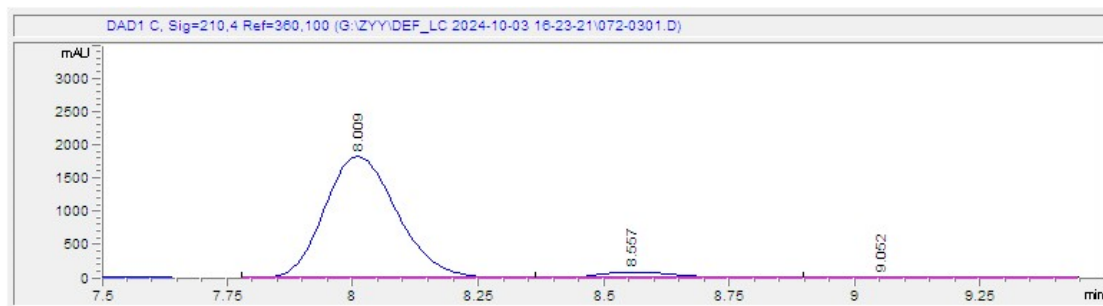

| # | Time  | Area    | Height | Width  | Area%  | Symmetry |
|---|-------|---------|--------|--------|--------|----------|
| 1 | 8.009 | 18561.1 | 1827   | 0.1585 | 94.474 | 0.804    |
| 2 | 8.557 | 1085.6  | 95.8   | 0.1703 | 5.526  | 0.72     |

**Racemic 4u:**

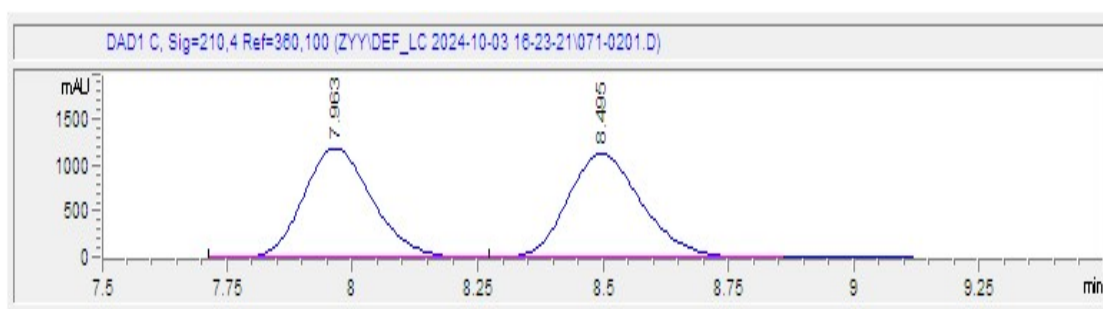

| # | Time  | Area    | Height | Width  | Area%  | Symmetry |
|---|-------|---------|--------|--------|--------|----------|
| 1 | 7.963 | 11519.7 | 1199.4 | 0.1481 | 49.361 | 0.798    |
| 2 | 8.495 | 11817.8 | 1135.9 | 0.1594 | 50.639 | 0.774    |

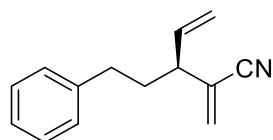

**4v**

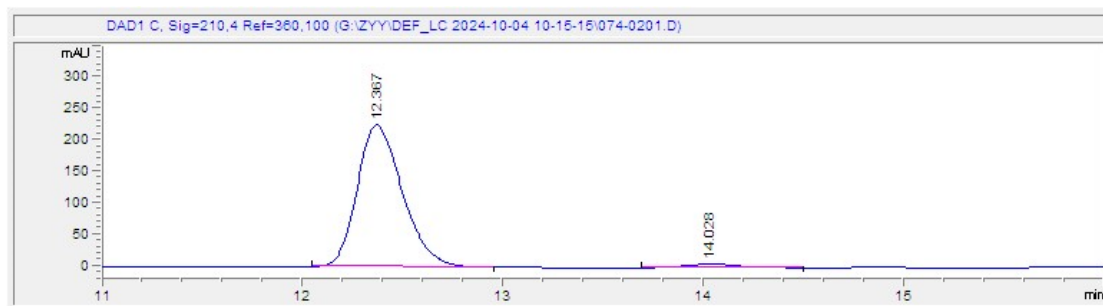

| # | Time   | Area   | Height | Width  | Area%  | Symmetry |
|---|--------|--------|--------|--------|--------|----------|
| 1 | 12.367 | 3544.6 | 225.7  | 0.2412 | 97.260 | 0.729    |
| 2 | 14.028 | 99.9   | 5.7    | 0.2739 | 2.740  | 0.873    |

**Racemic 4v:**

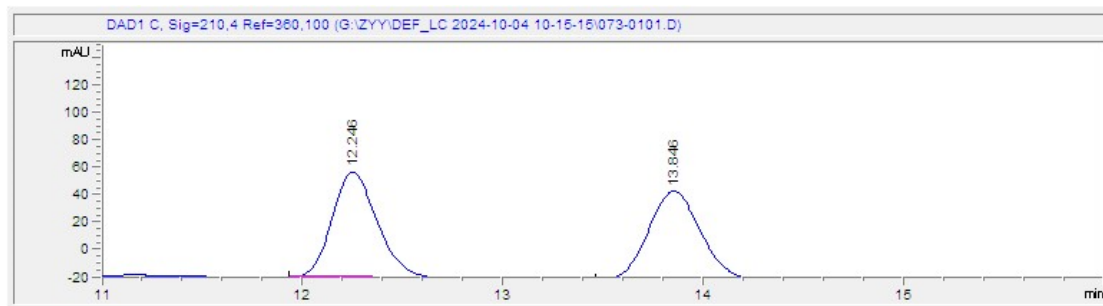

| # | Time   | Area   | Height | Width  | Area%  | Symmetry |
|---|--------|--------|--------|--------|--------|----------|
| 1 | 12.246 | 1211.2 | 77.1   | 0.2433 | 50.997 | 0.786    |
| 2 | 13.846 | 1163.8 | 64.7   | 0.282  | 49.003 | 0.894    |

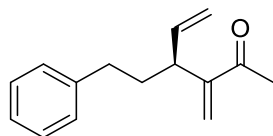

**4w**

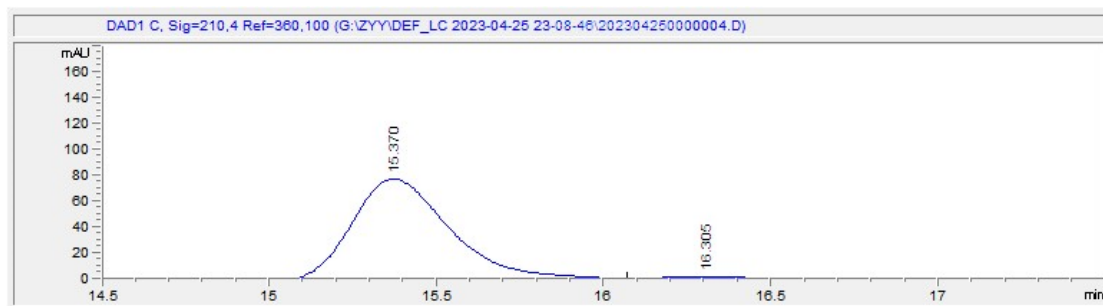

| # | Time   | Area   | Height | Width  | Area%  | Symmetry |
|---|--------|--------|--------|--------|--------|----------|
| 1 | 15.37  | 1706.7 | 80.1   | 0.3227 | 95.277 | 0.685    |
| 2 | 16.305 | 84.6   | 3.3    | 0.3392 | 4.723  | 0.865    |

**Racemic 4w:**

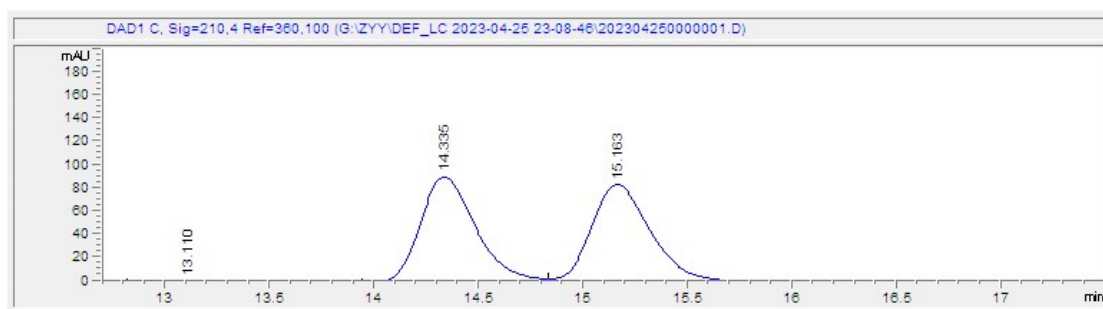

| # | Time   | Area   | Height | Width  | Area%  | Symmetry |
|---|--------|--------|--------|--------|--------|----------|
| 1 | 14.335 | 1751.8 | 92     | 0.2901 | 50.342 | 0.713    |
| 2 | 15.163 | 1728   | 85.4   | 0.31   | 49.658 | 0.727    |



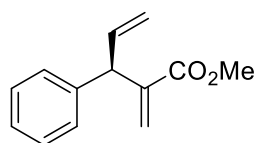

4x

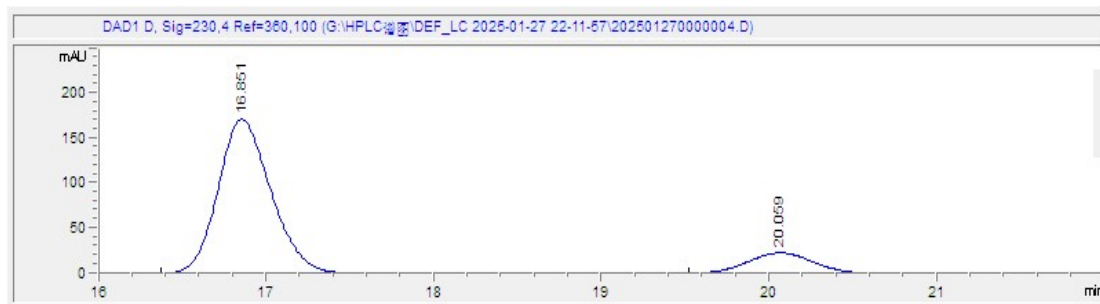

| # | Time   | Area  | Height | Width  | Area%  | Symmetry |
|---|--------|-------|--------|--------|--------|----------|
| 1 | 16.851 | 3773  | 171.8  | 0.3363 | 85.147 | 0.775    |
| 2 | 20.059 | 658.2 | 23.4   | 0.4342 | 14.853 | 0.941    |

Racemic

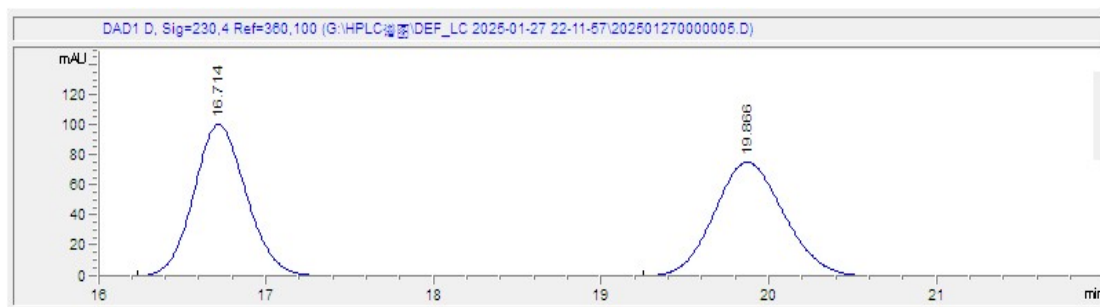

| # | Time   | Area   | Height | Width  | Area%  | Symmetry |
|---|--------|--------|--------|--------|--------|----------|
| 1 | 16.714 | 2211.3 | 101.2  | 0.3368 | 50.019 | 0.865    |
| 2 | 19.866 | 2209.6 | 76.1   | 0.4487 | 49.981 | 0.866    |

# NMR spectra

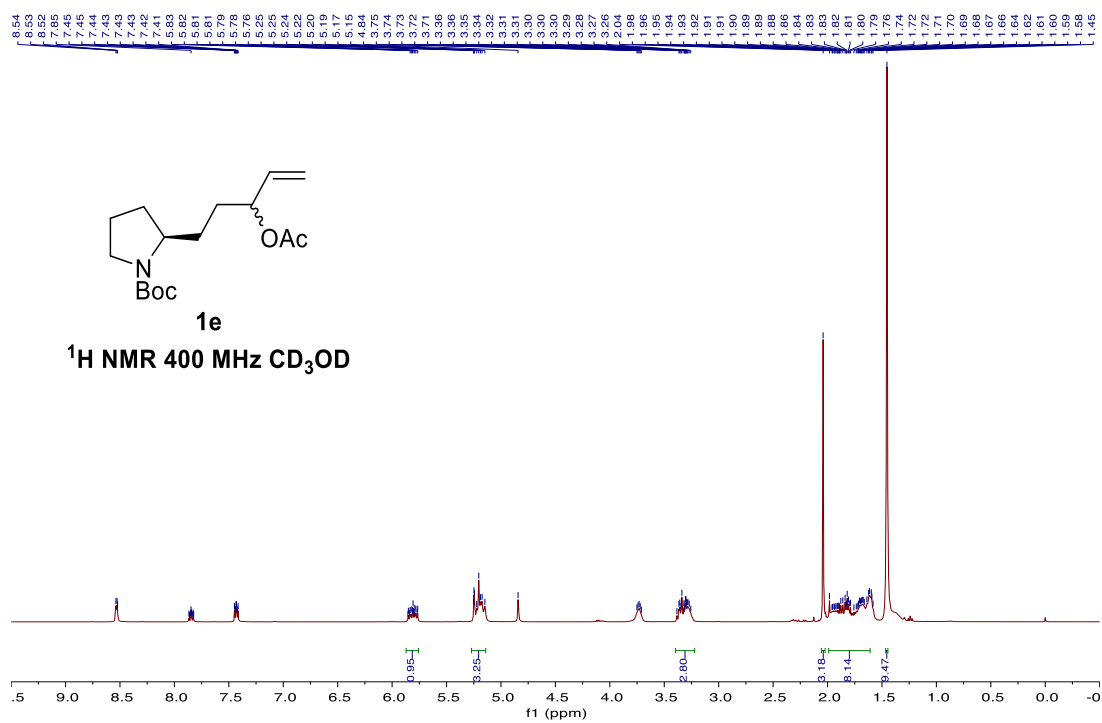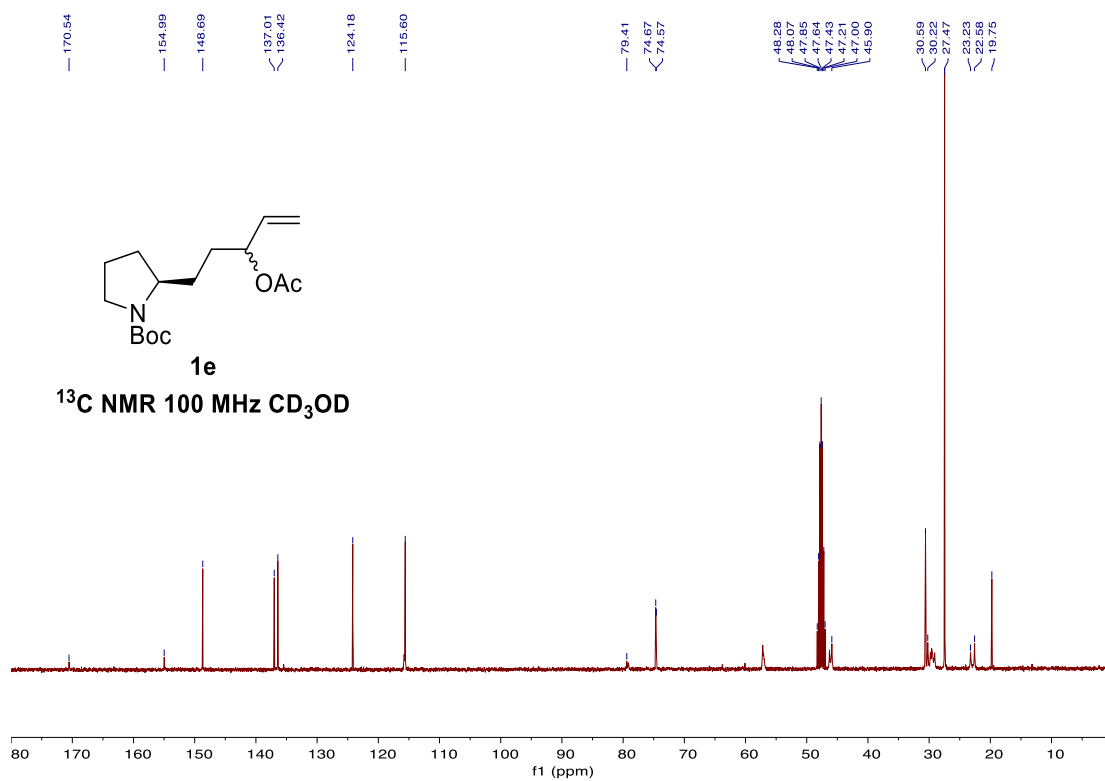

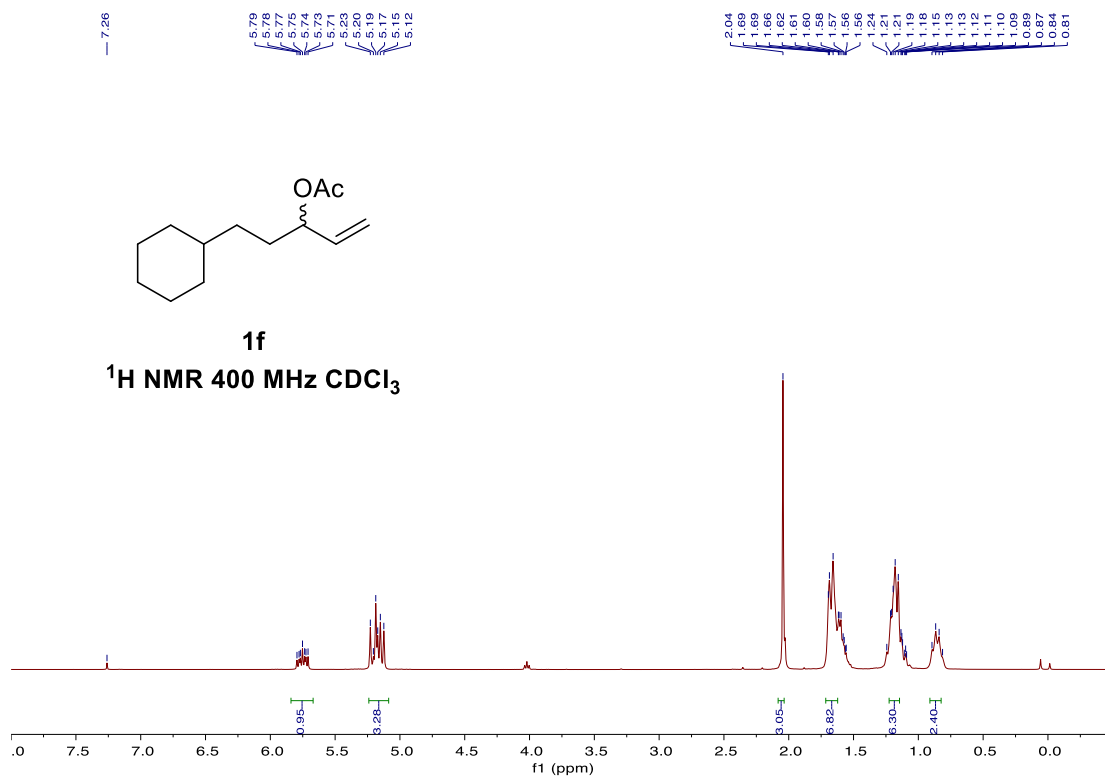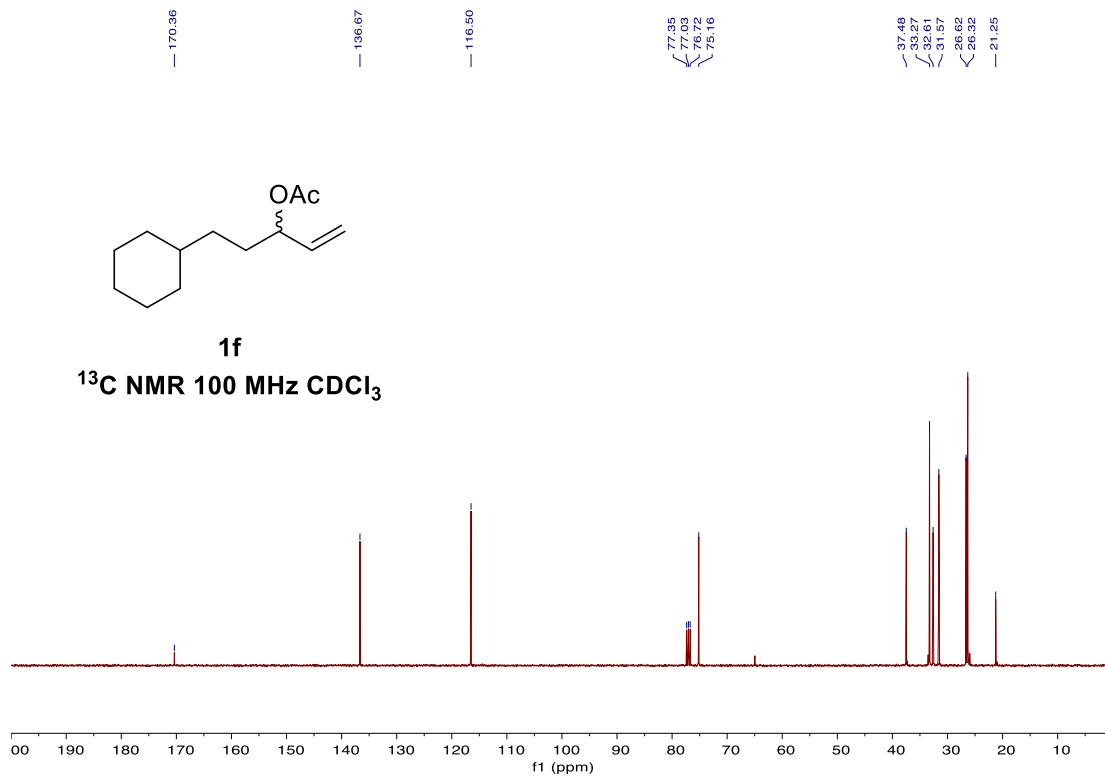

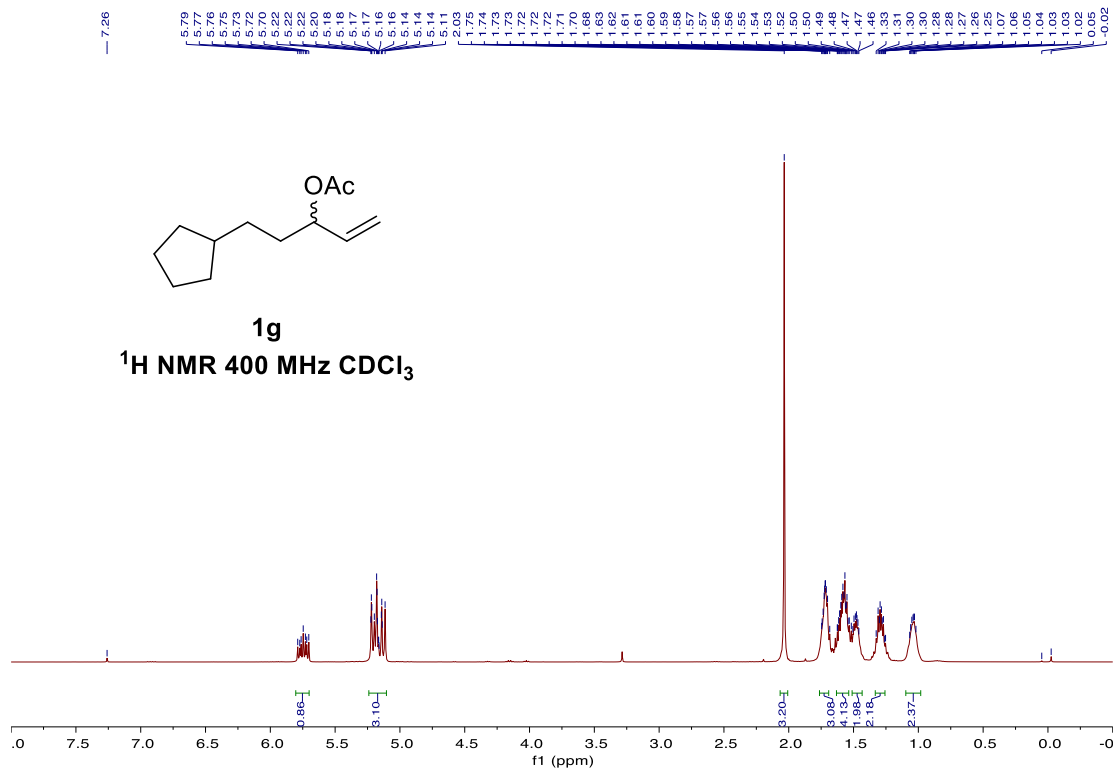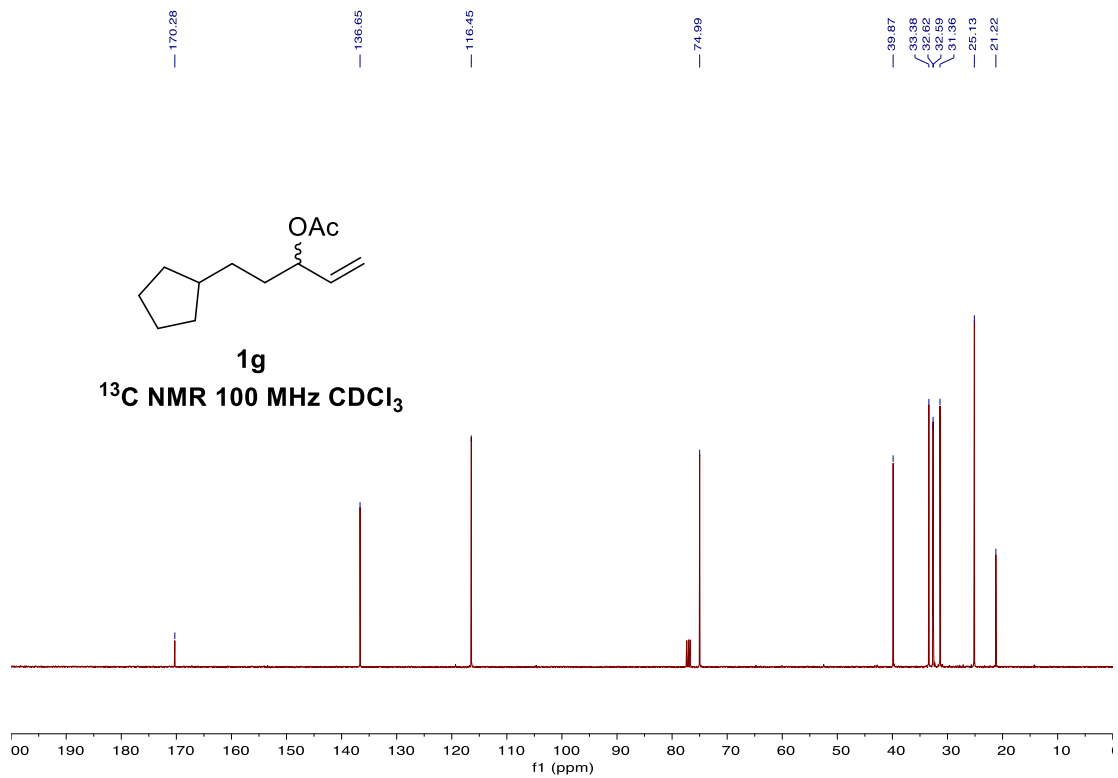

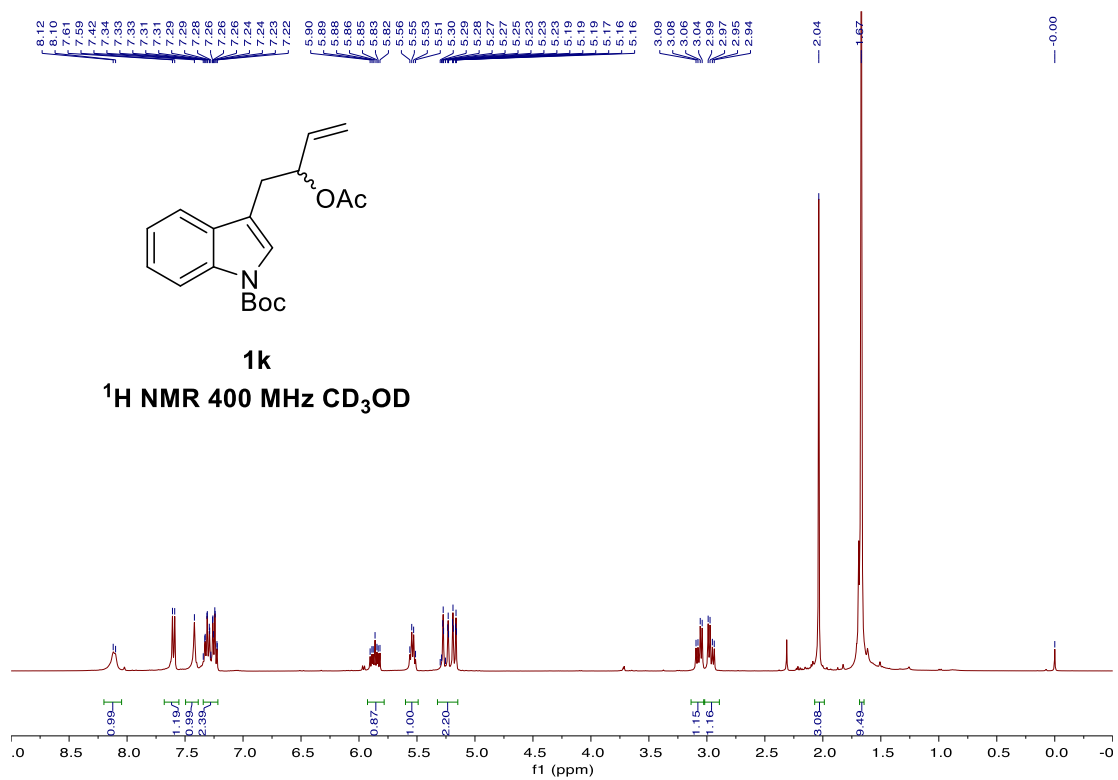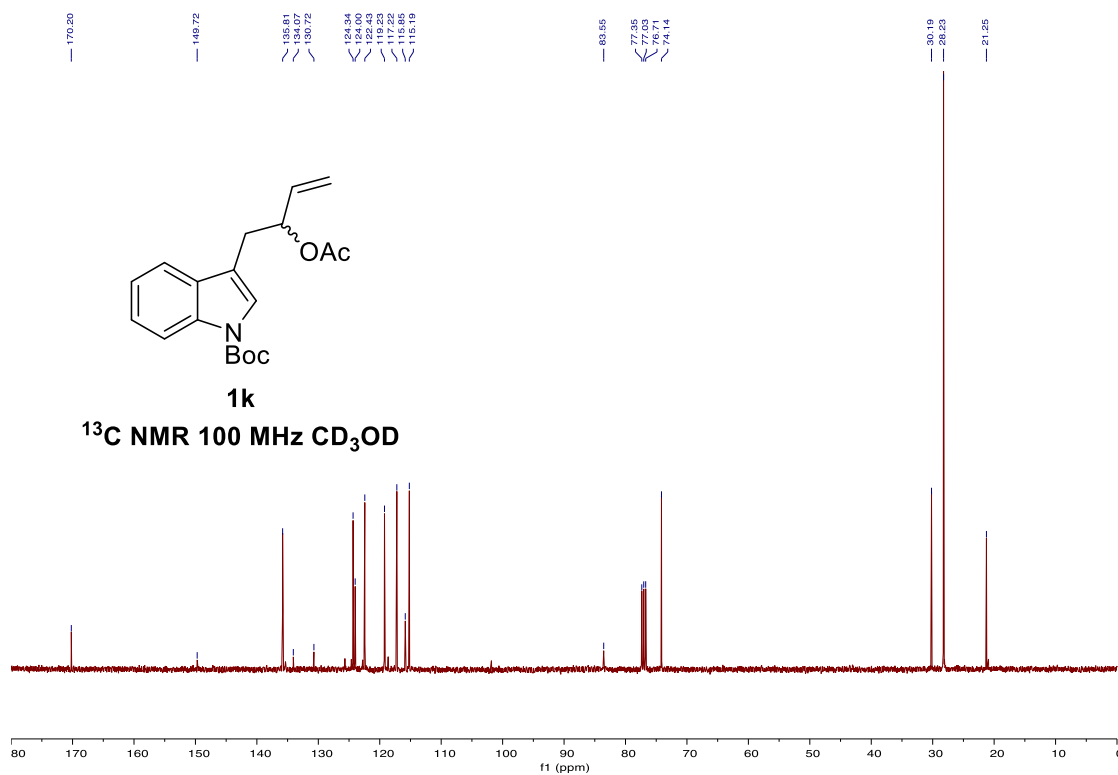

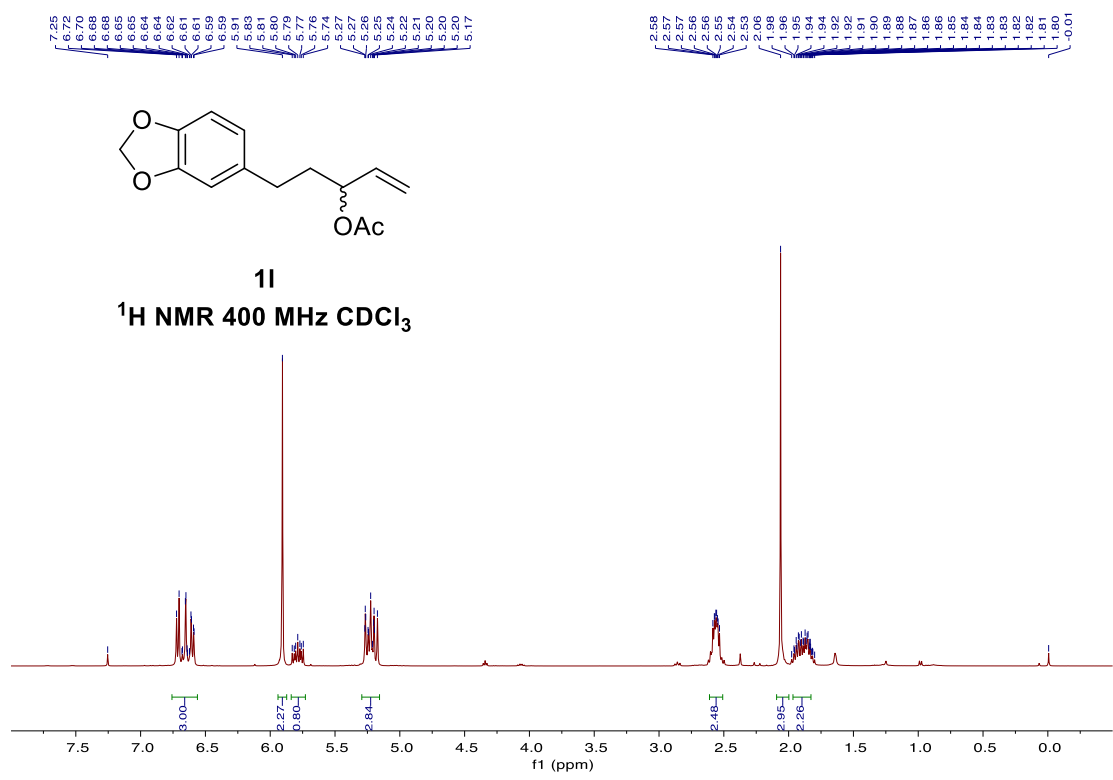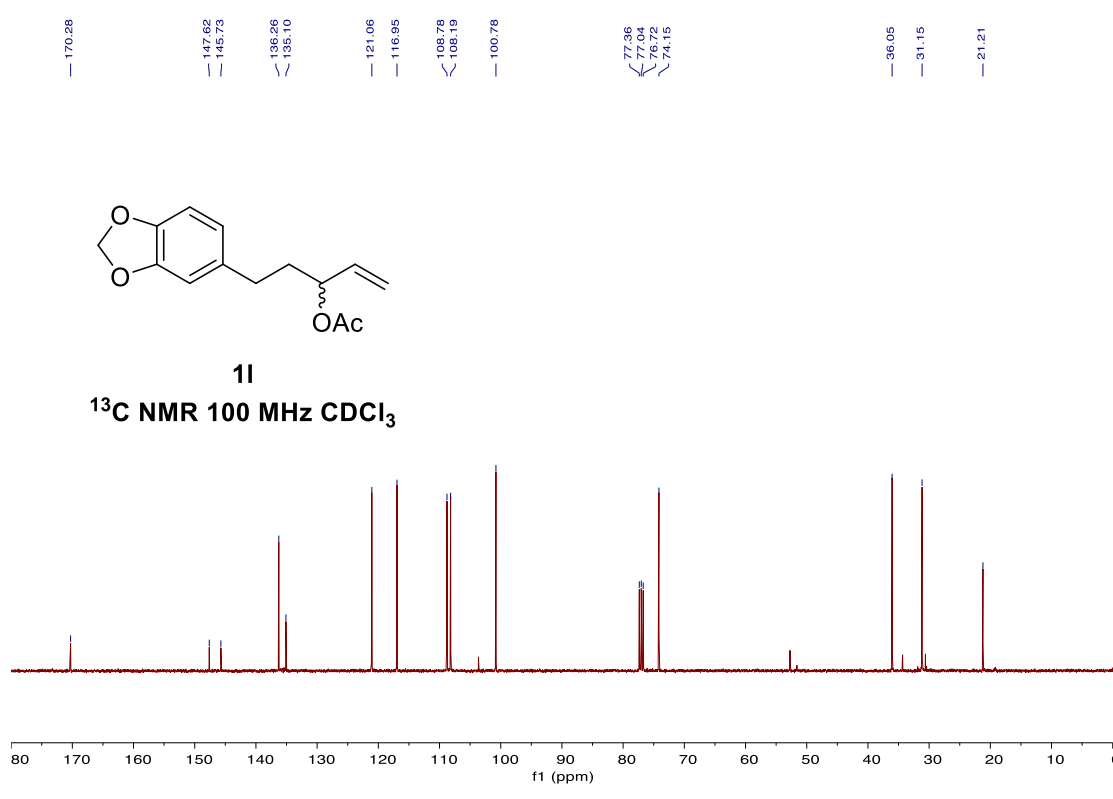

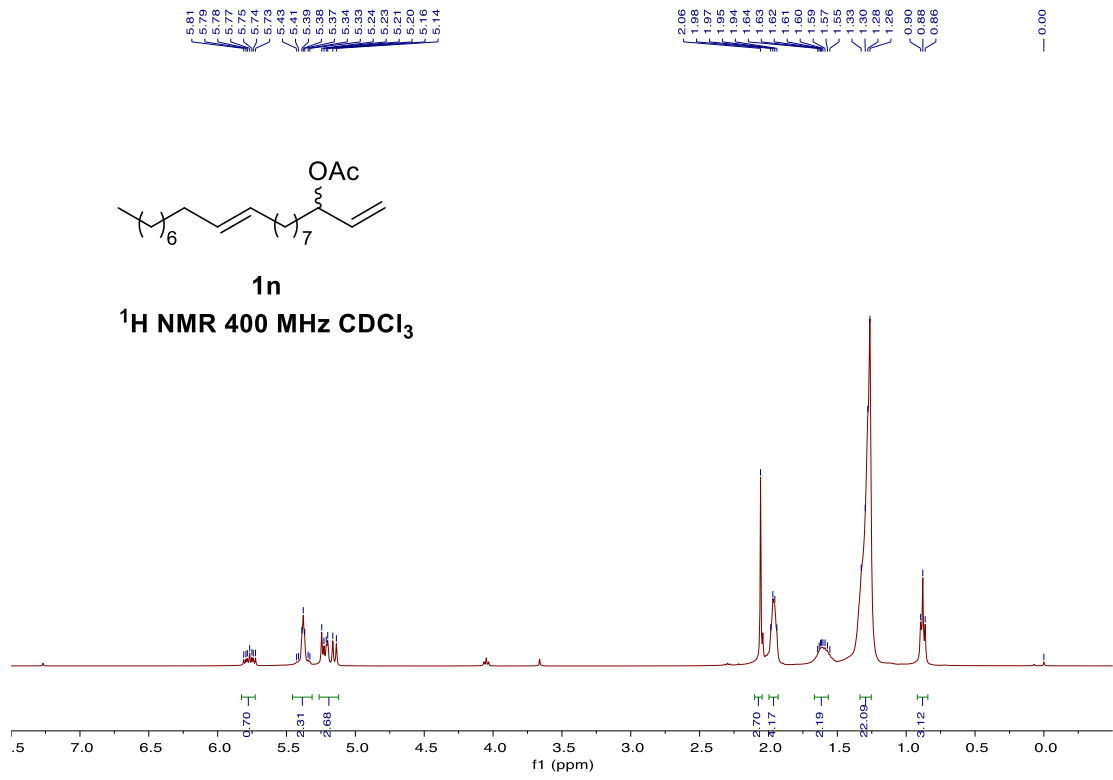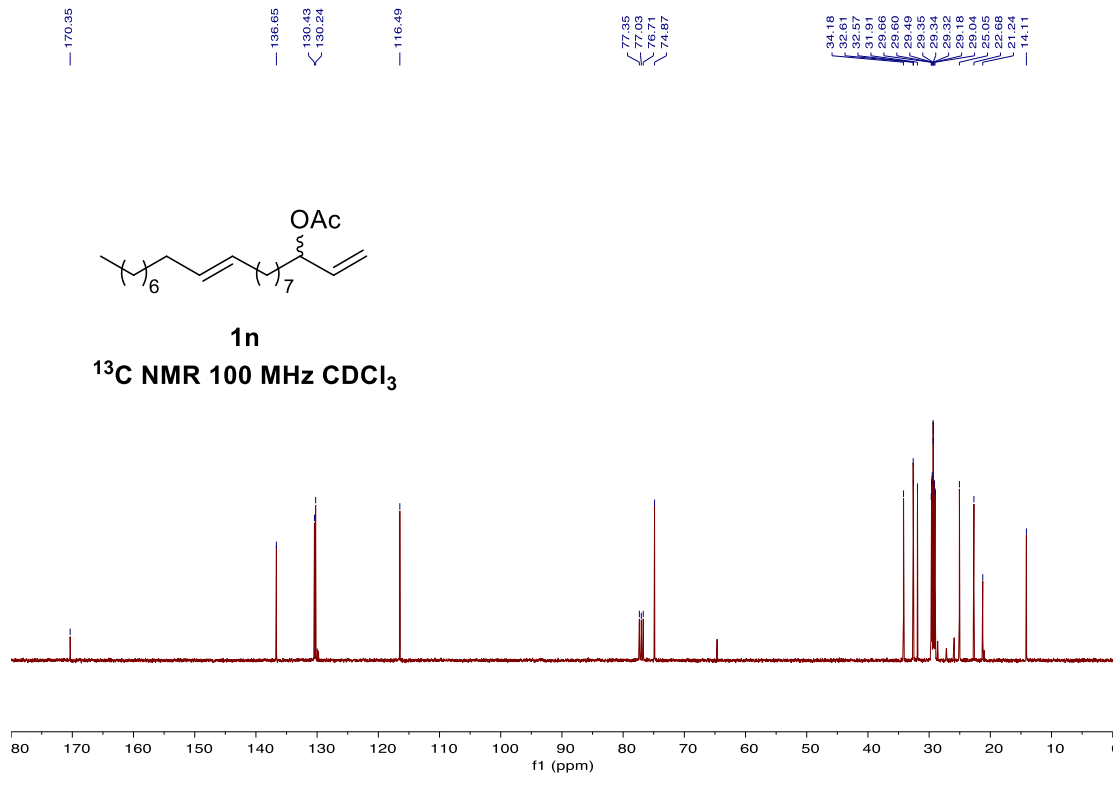

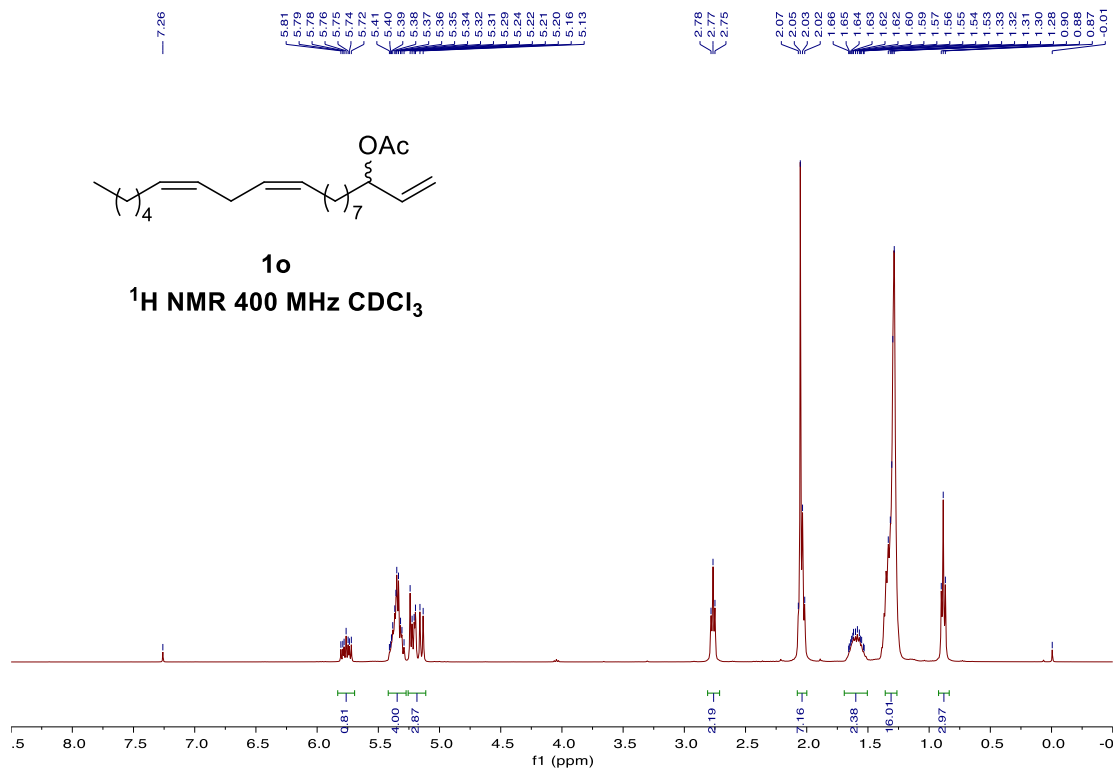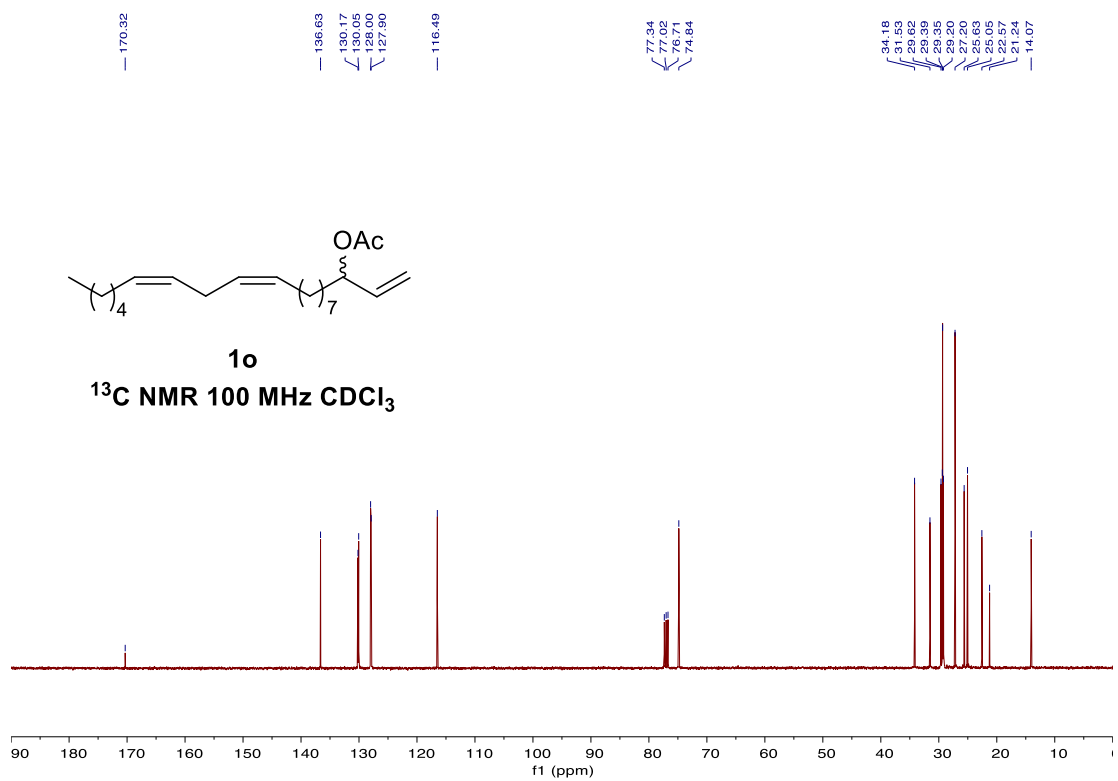



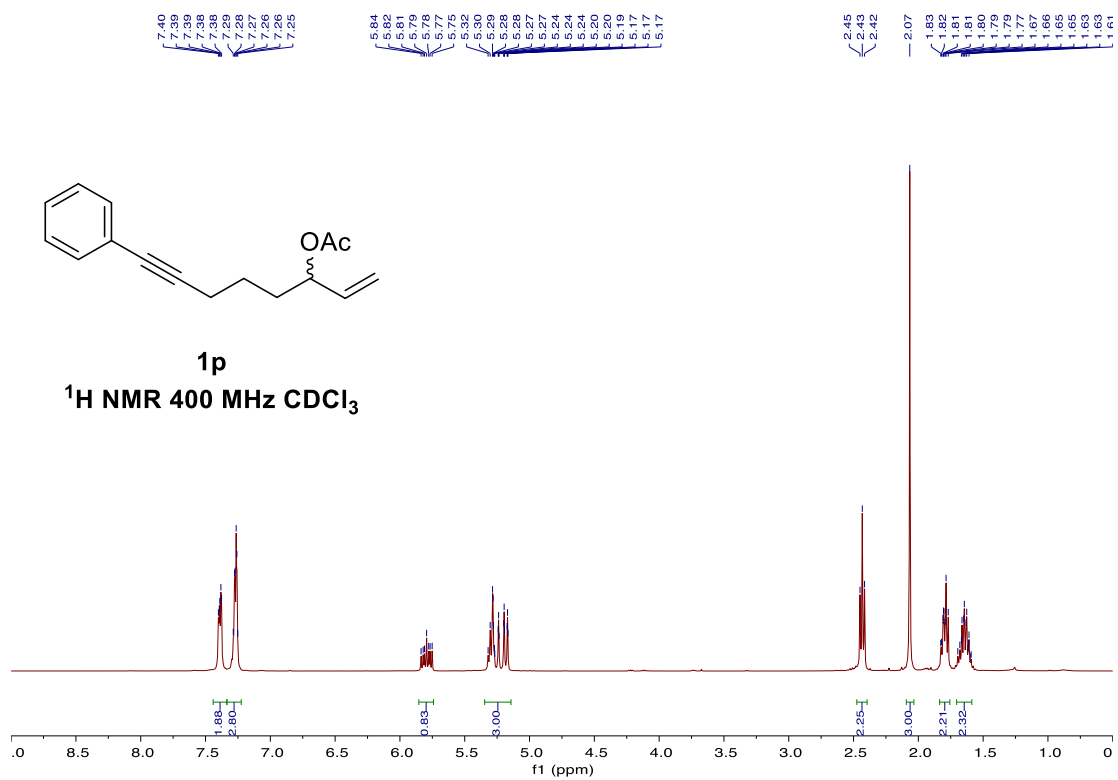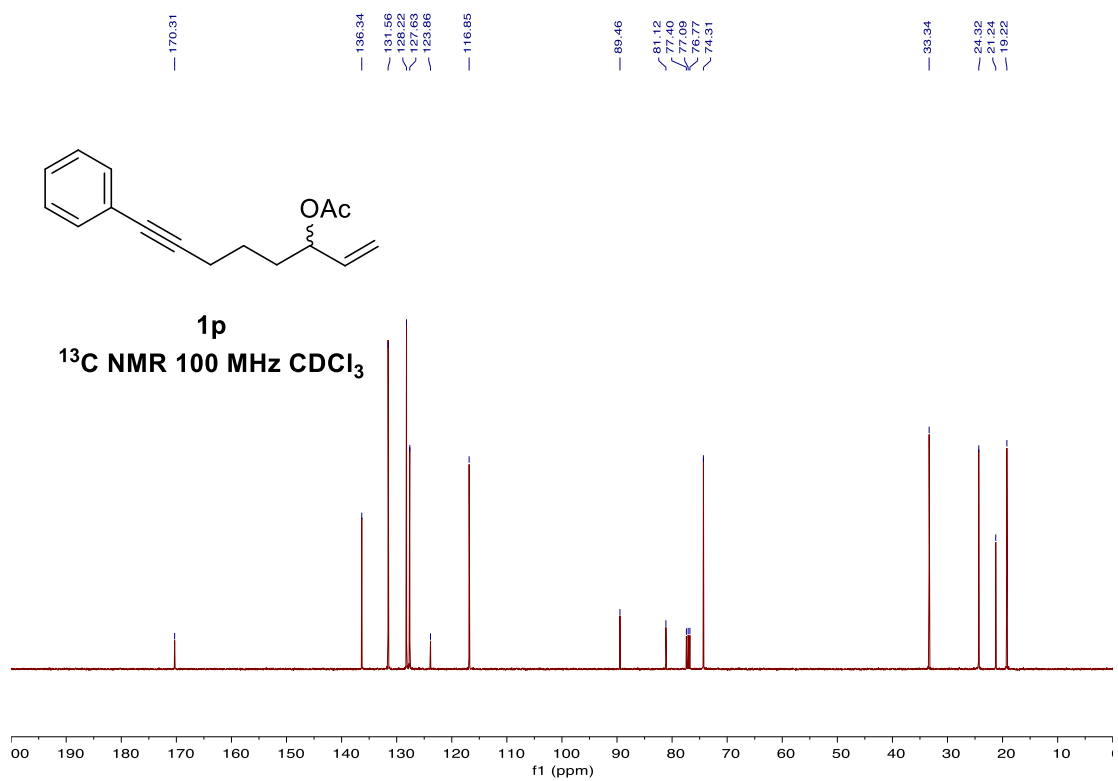

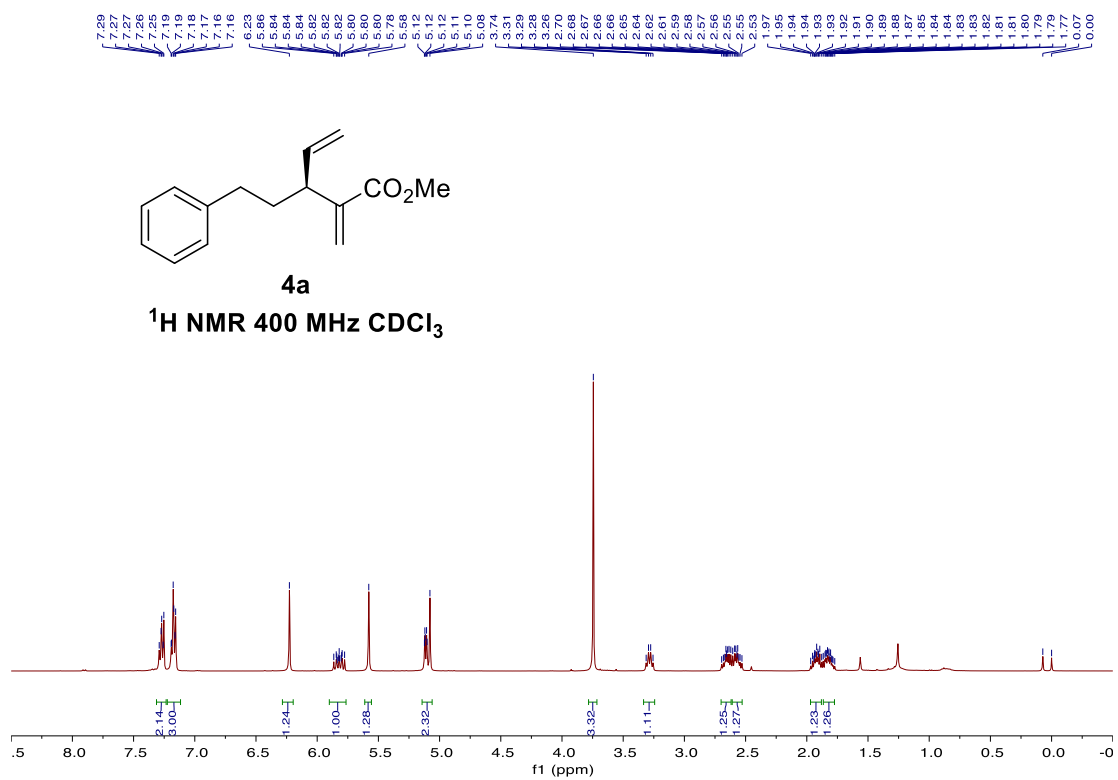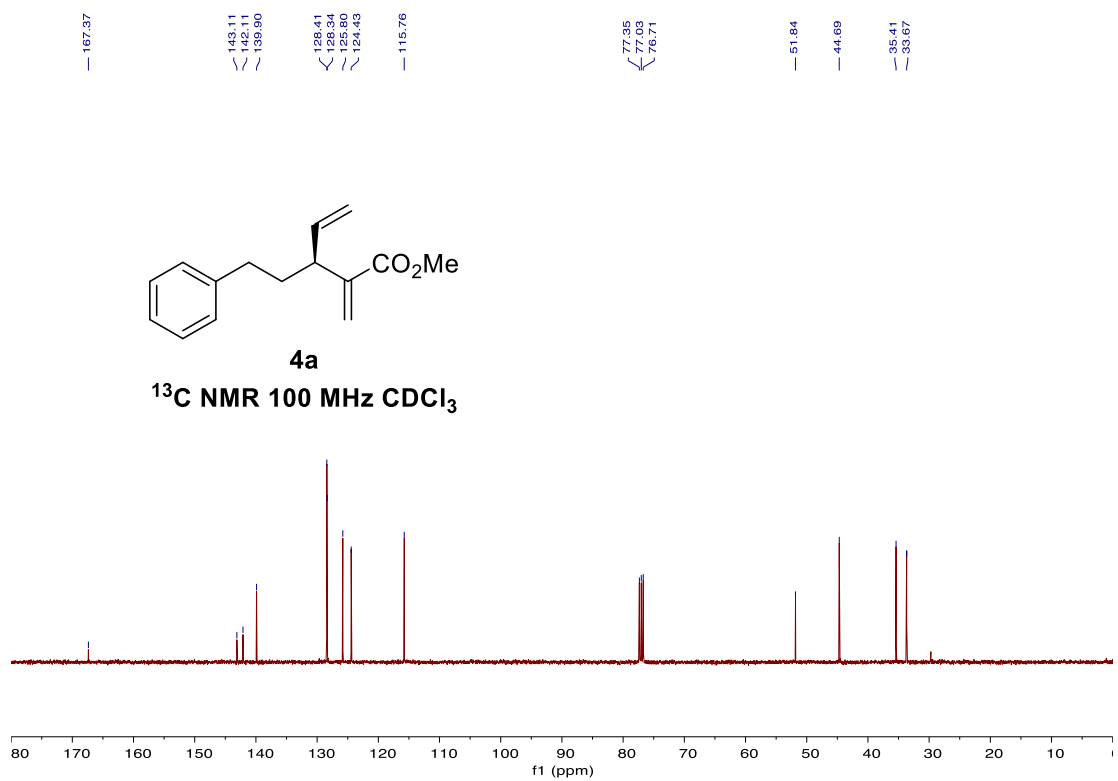

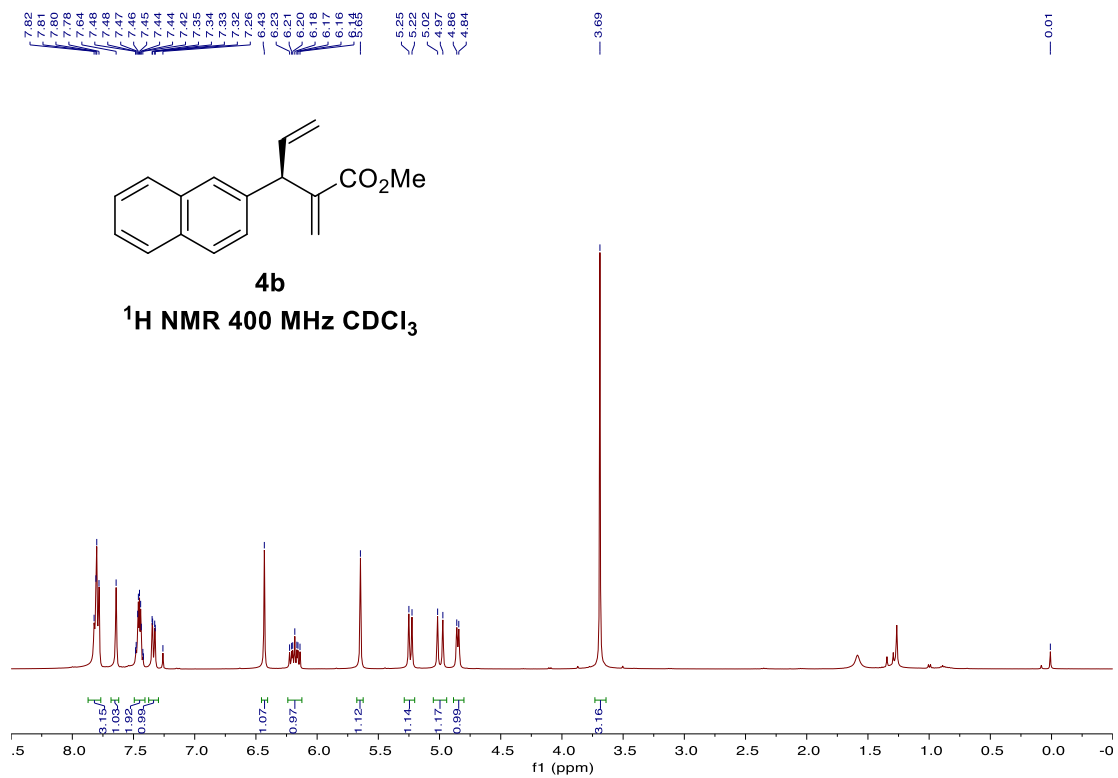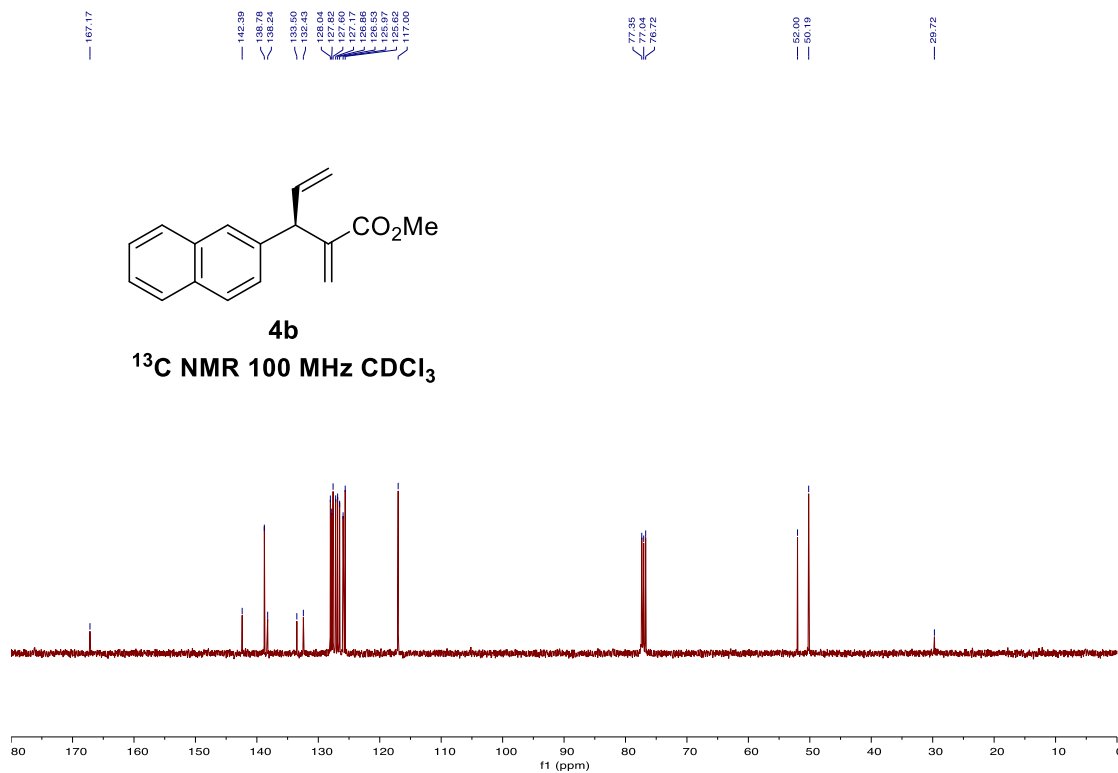

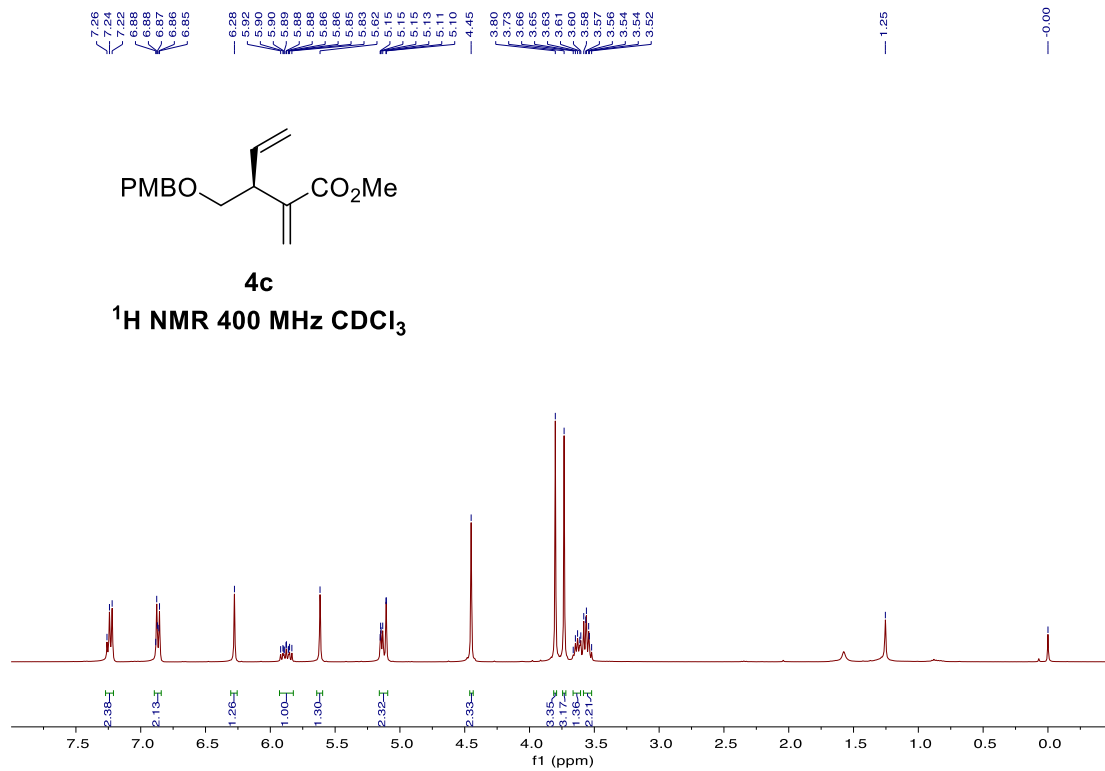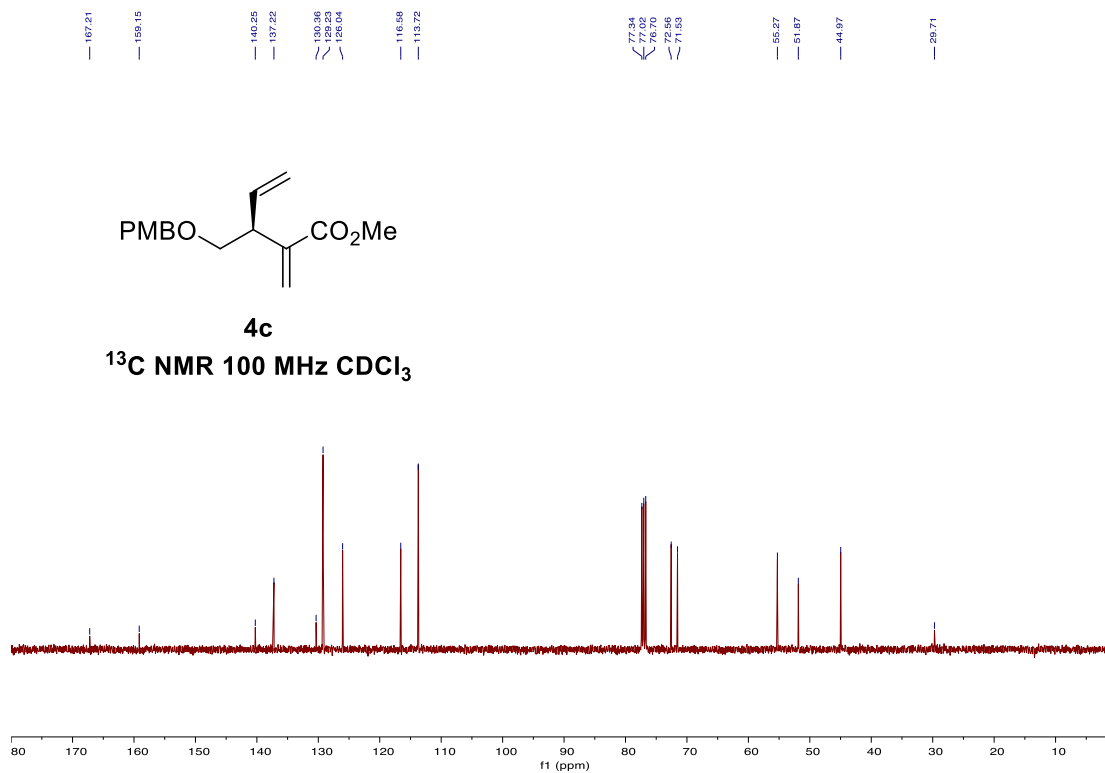

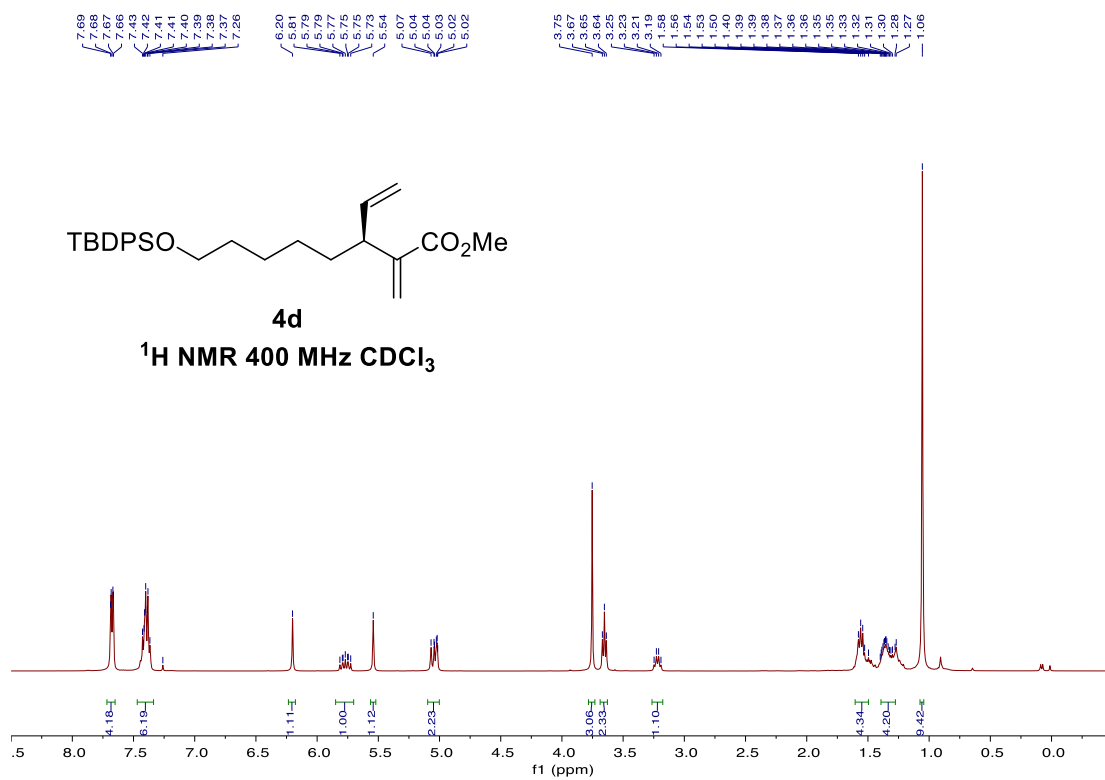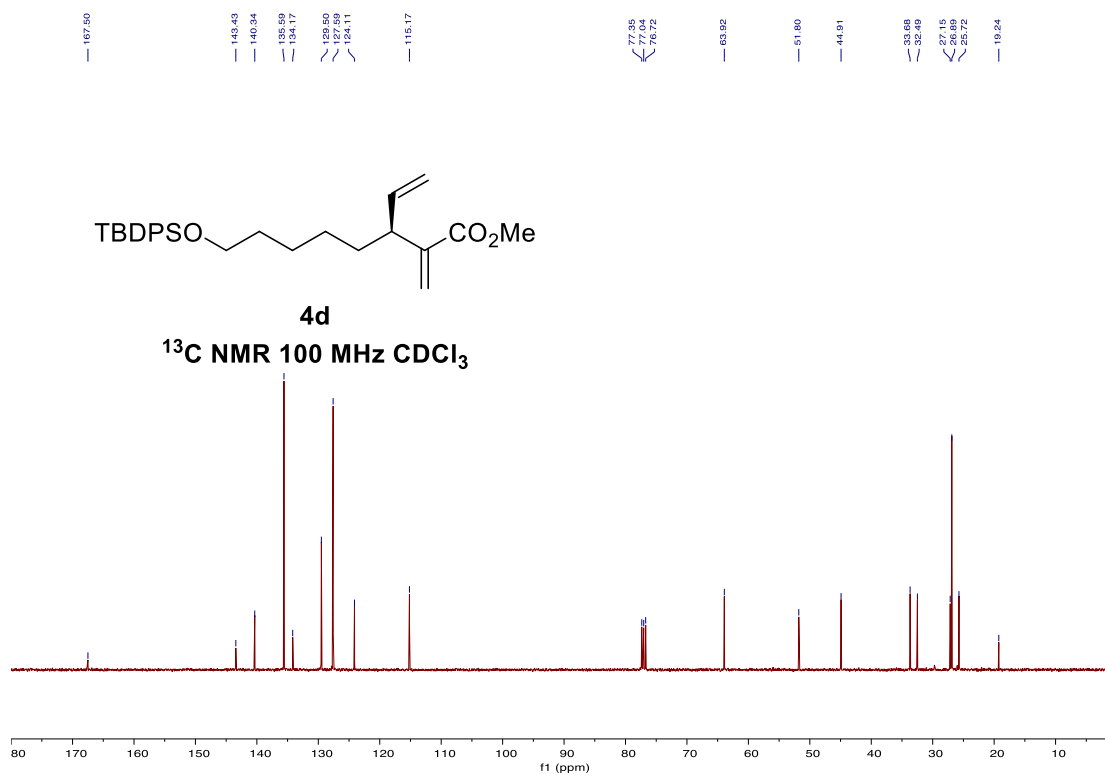

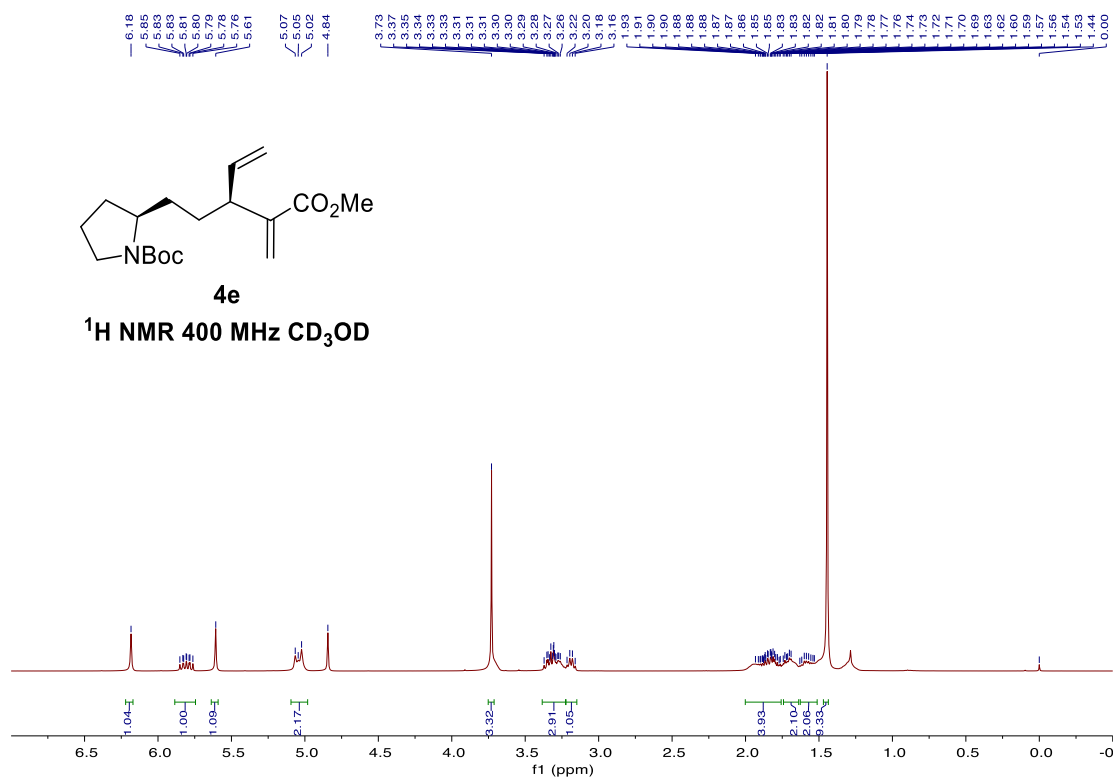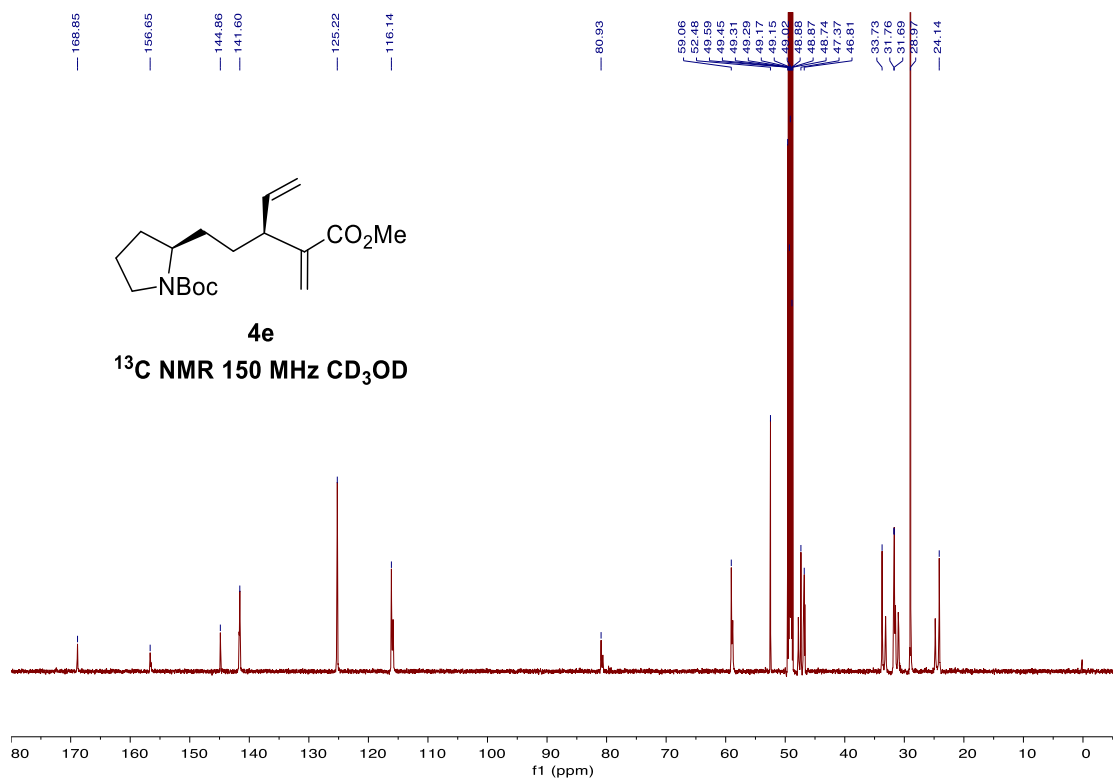

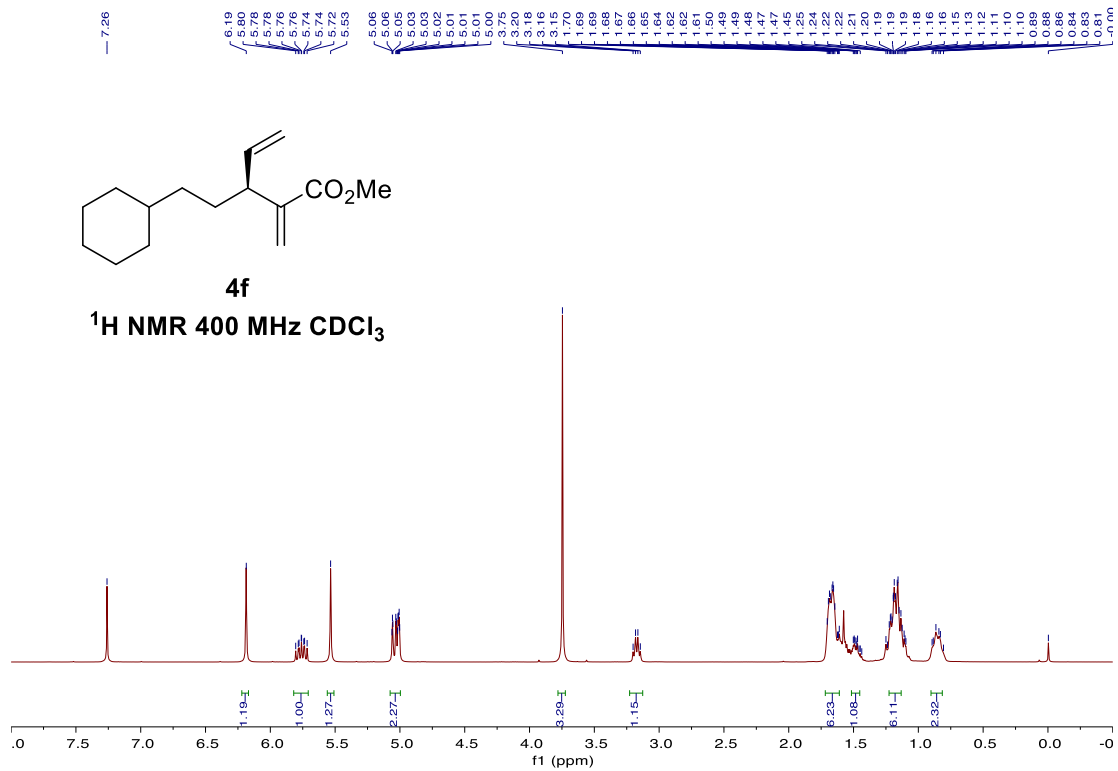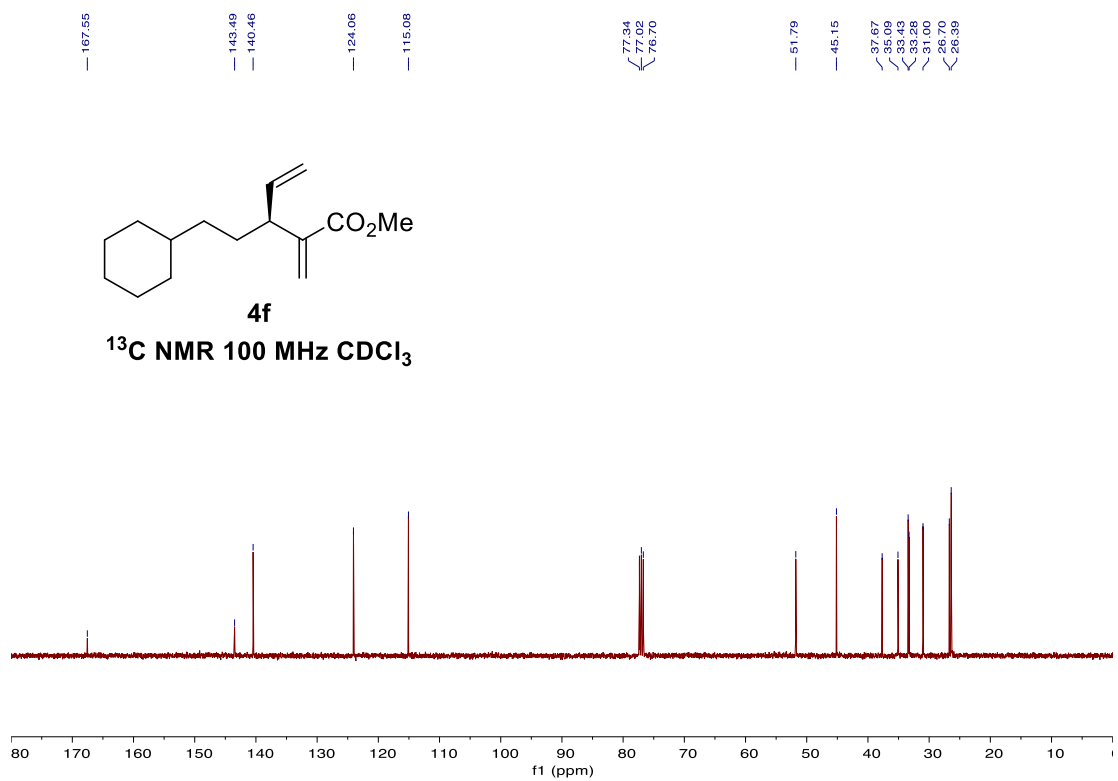

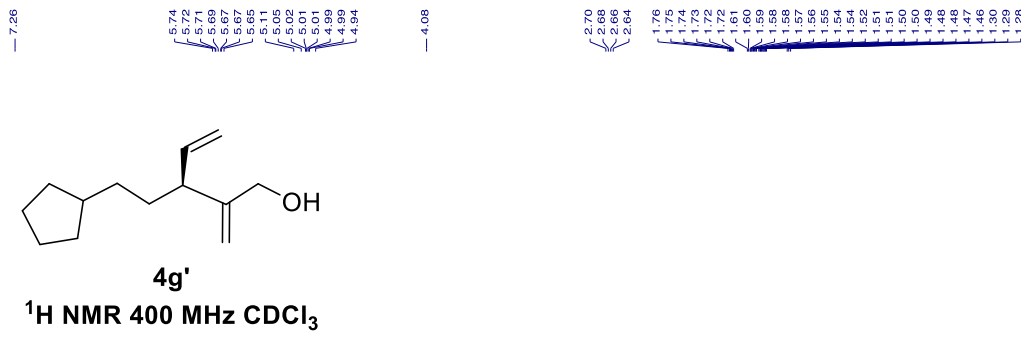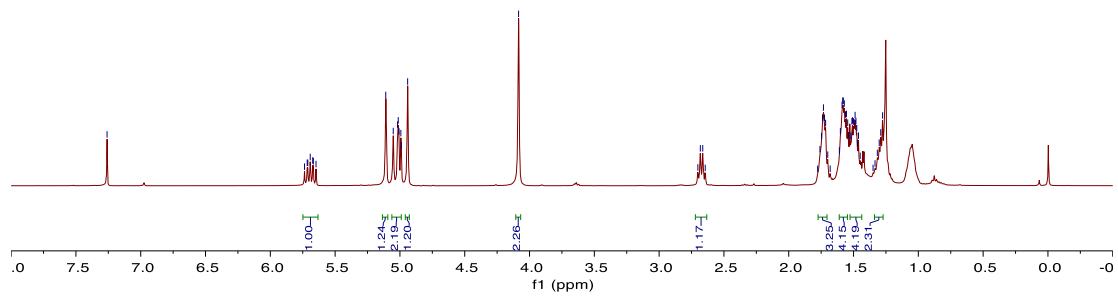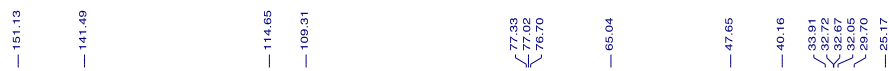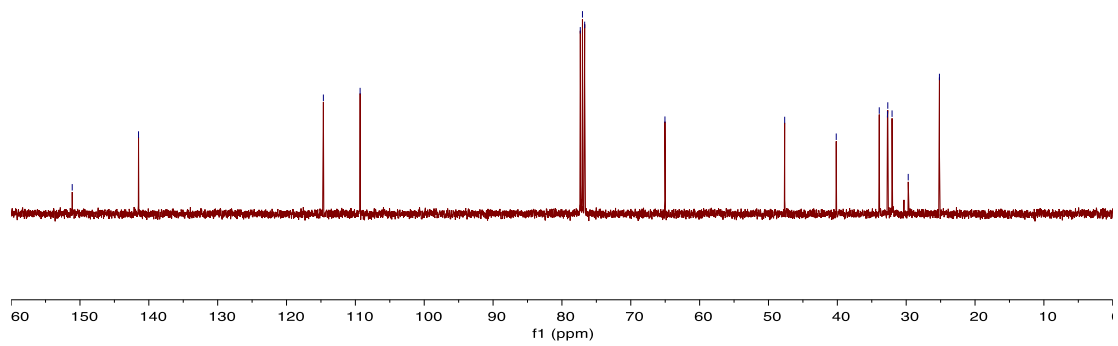



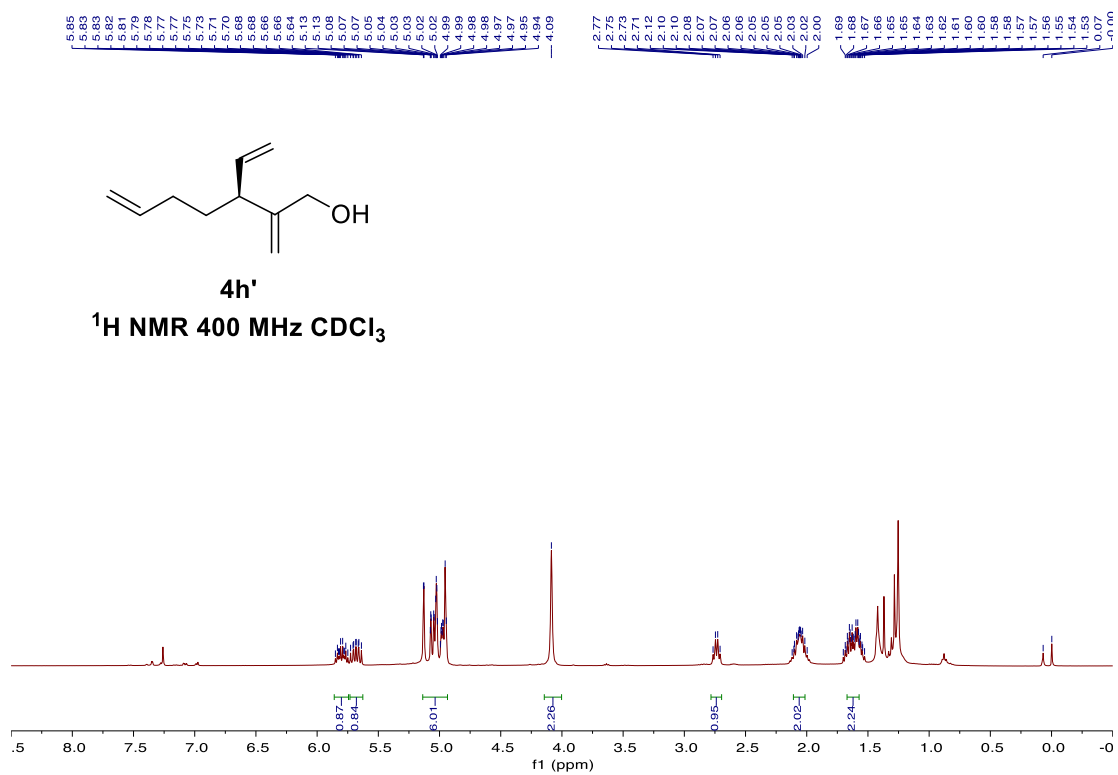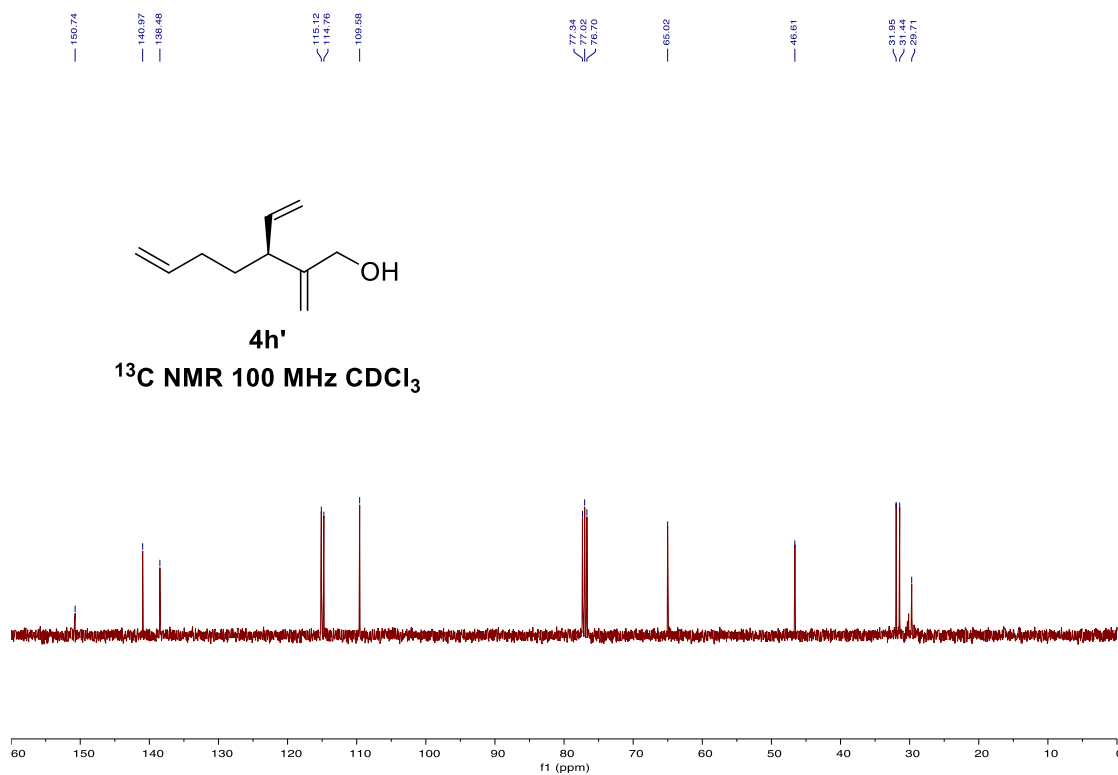

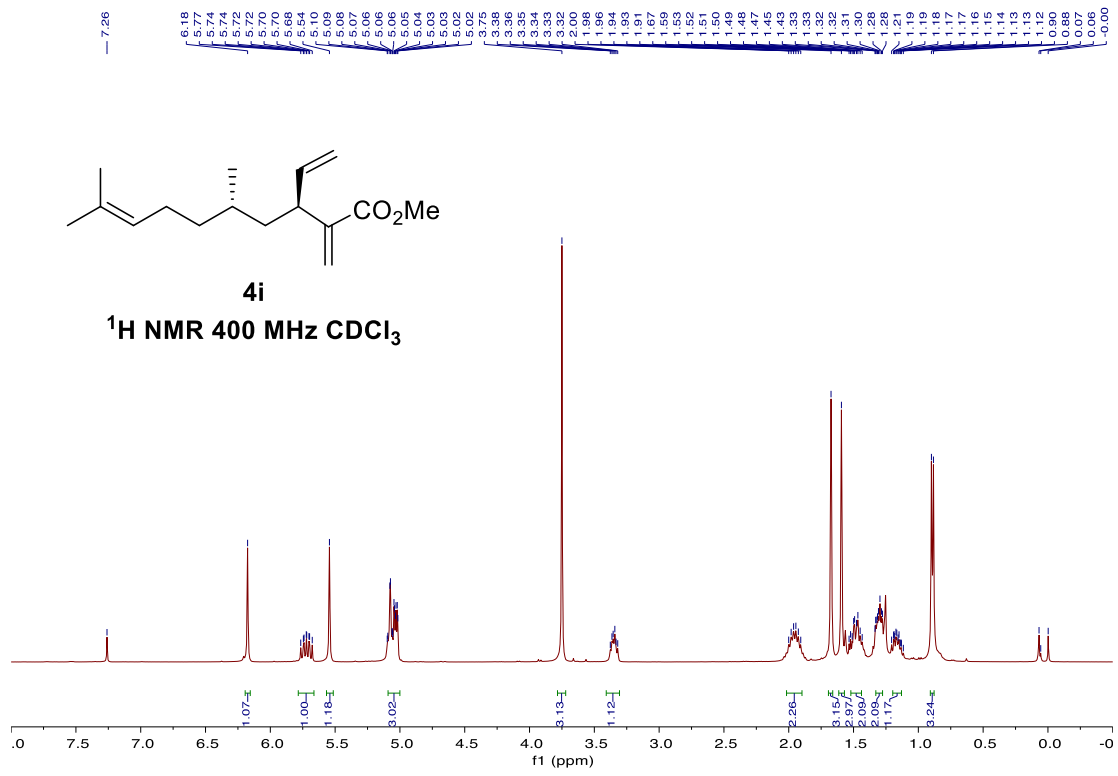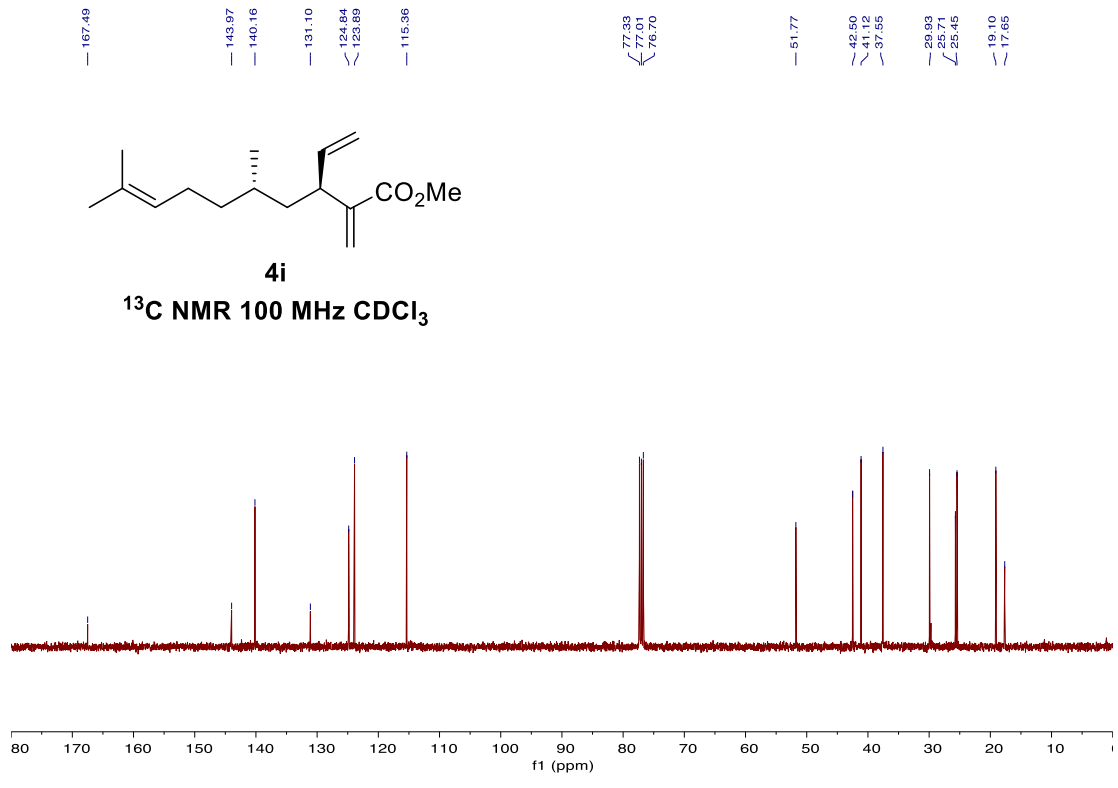



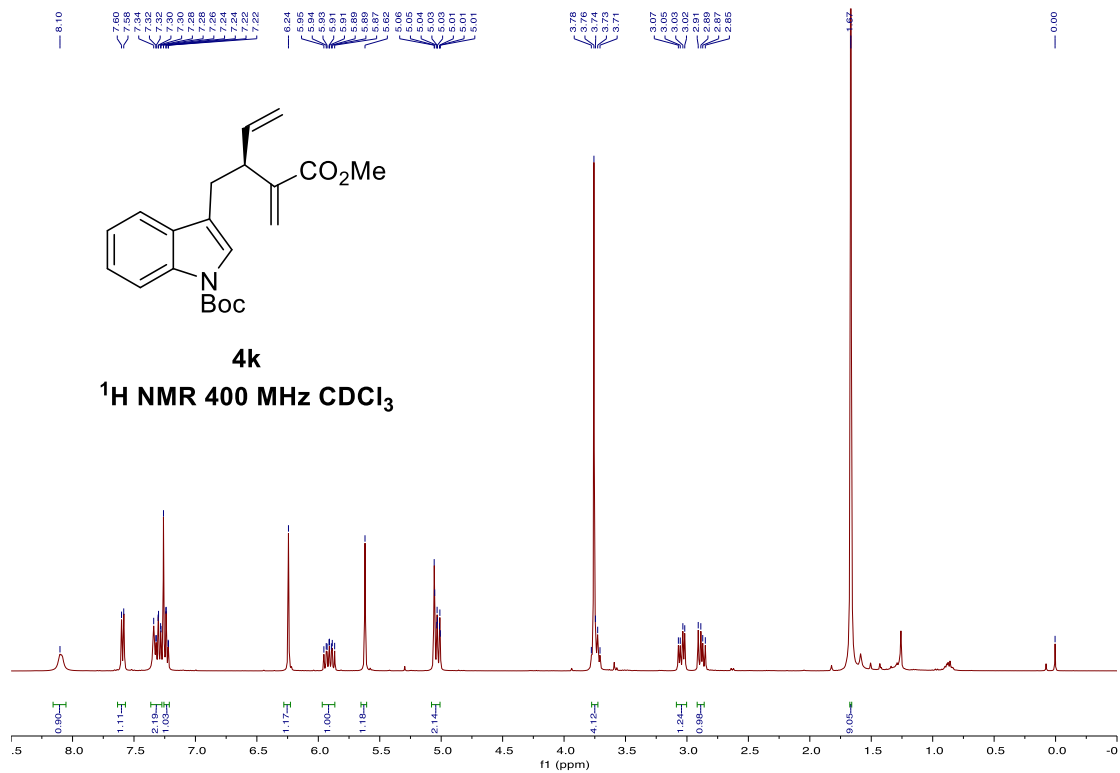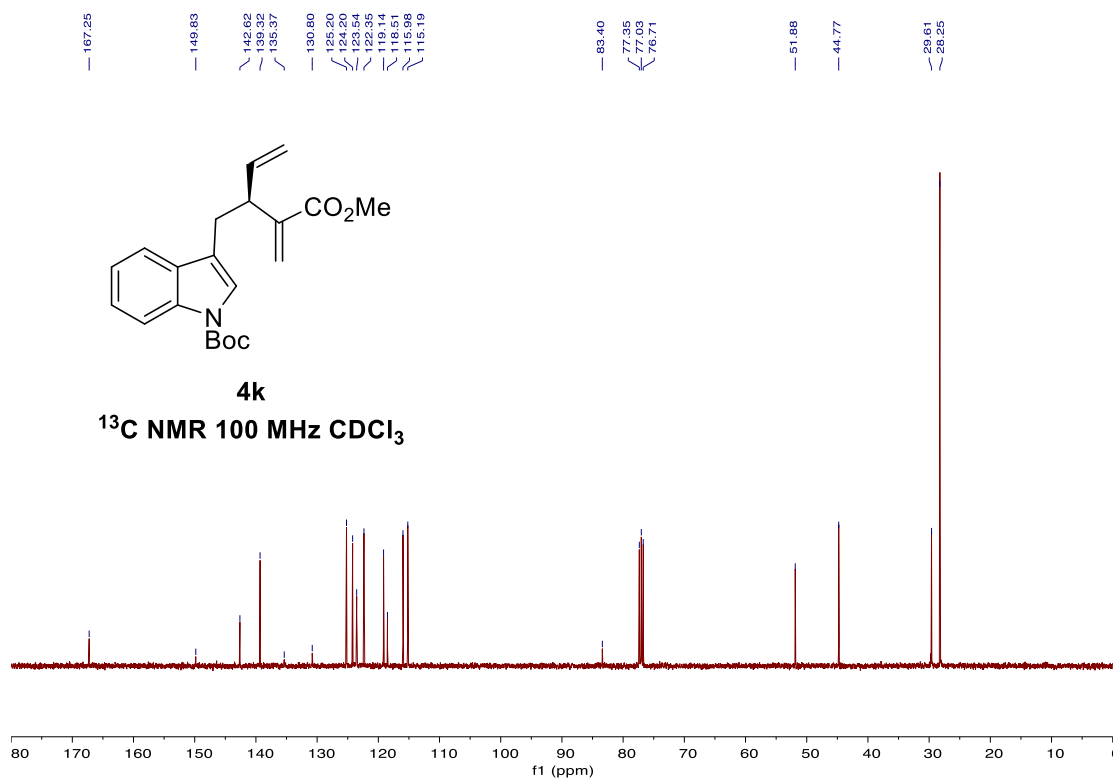

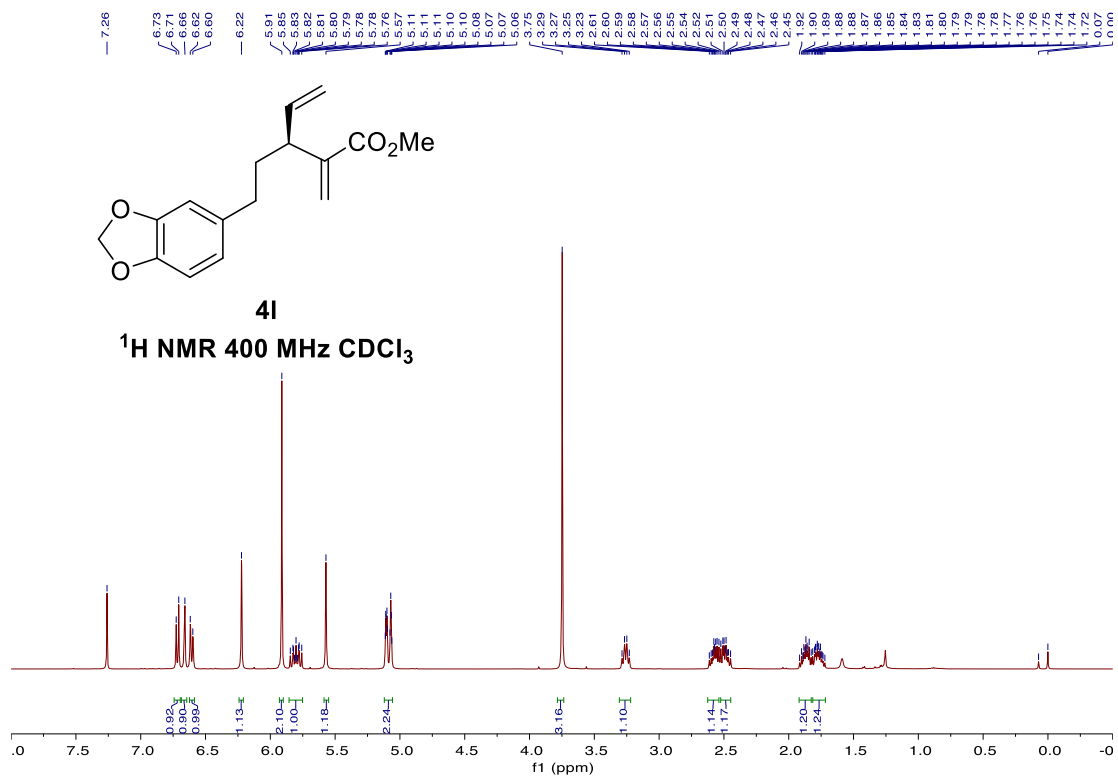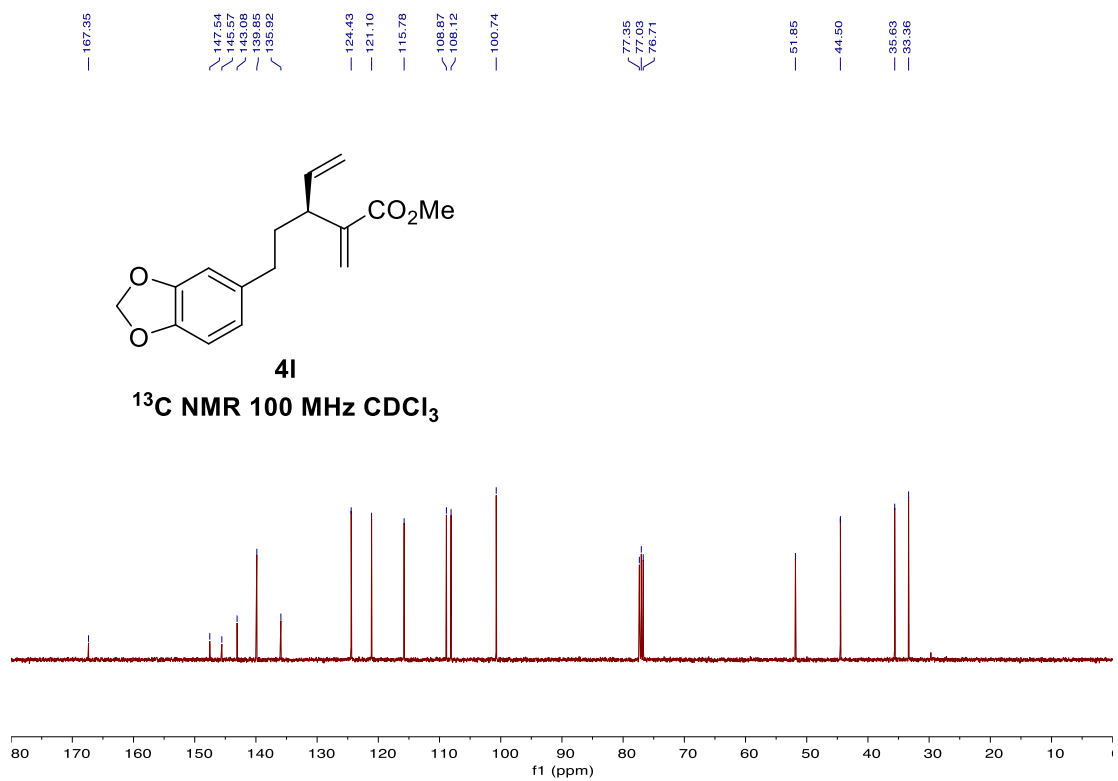

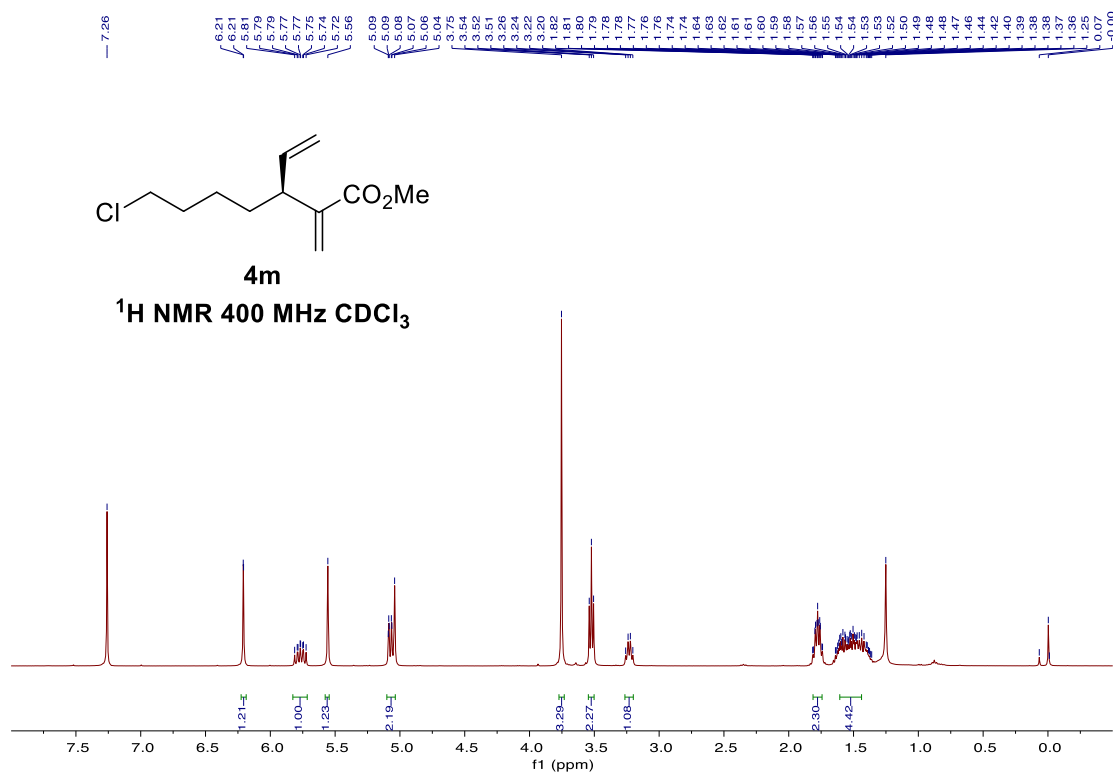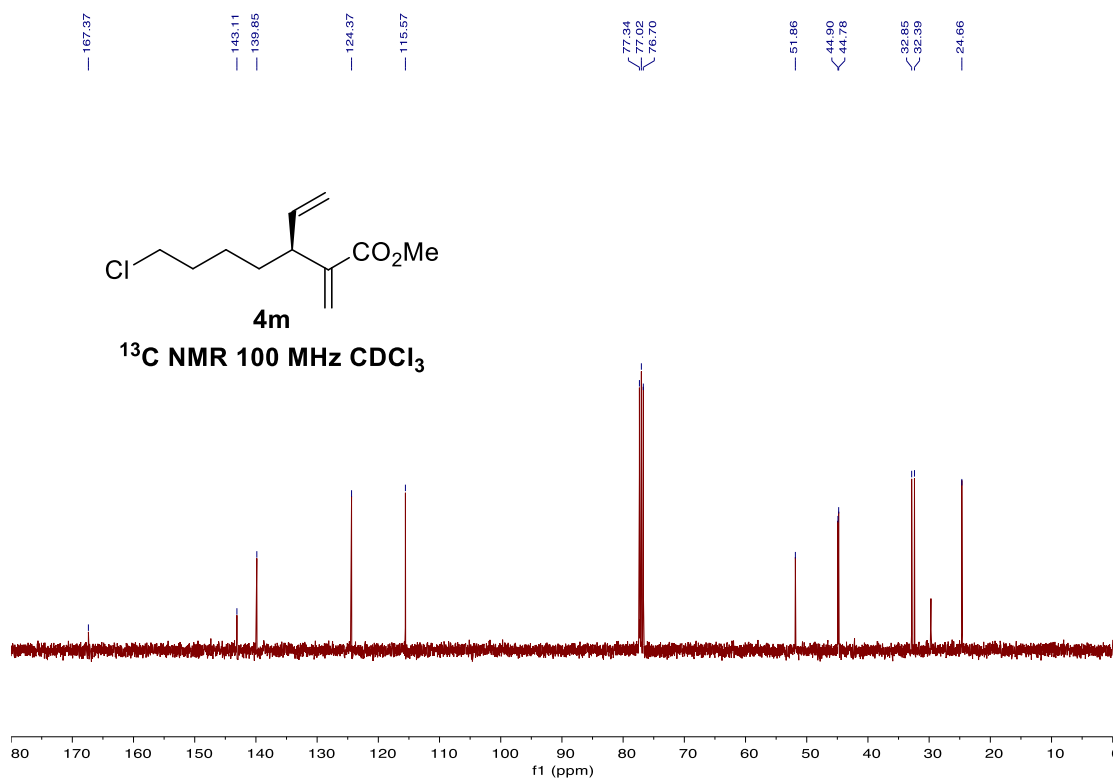

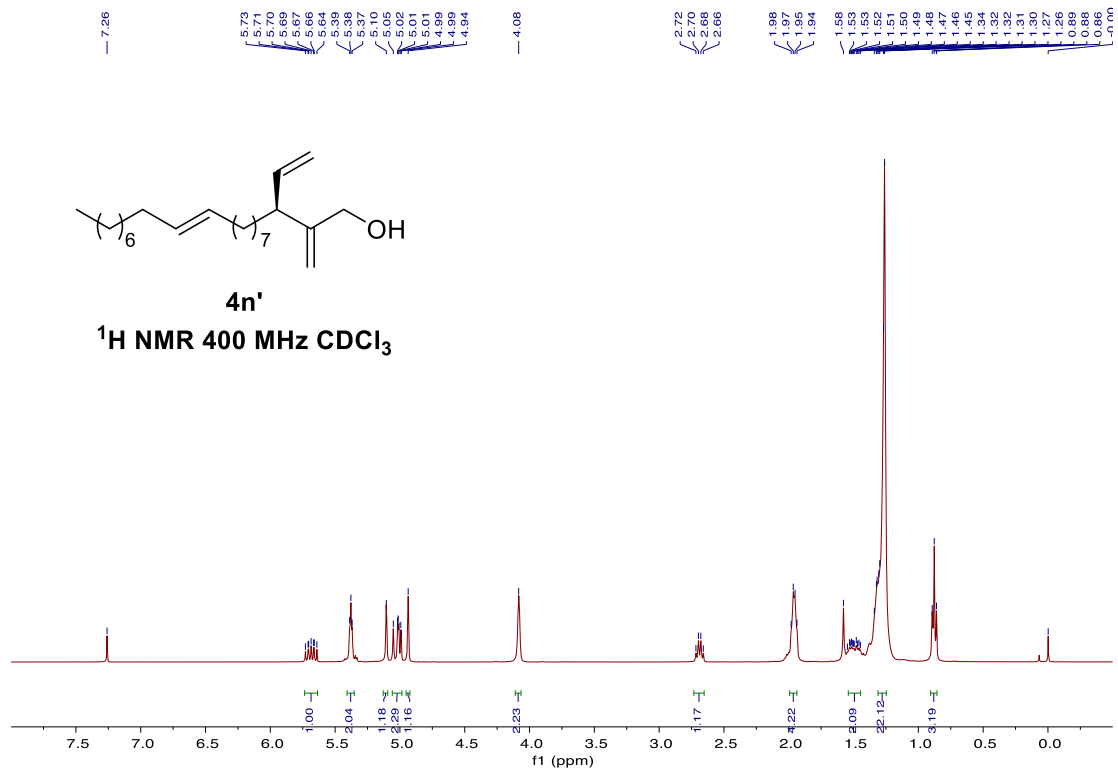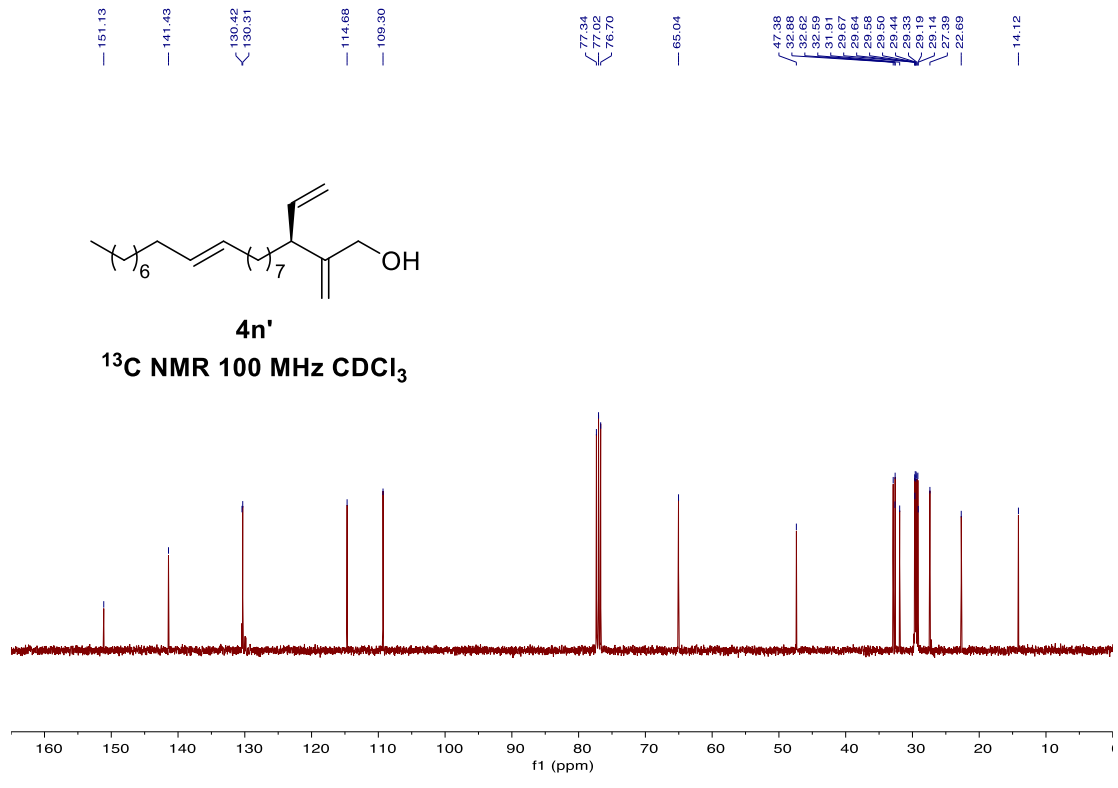

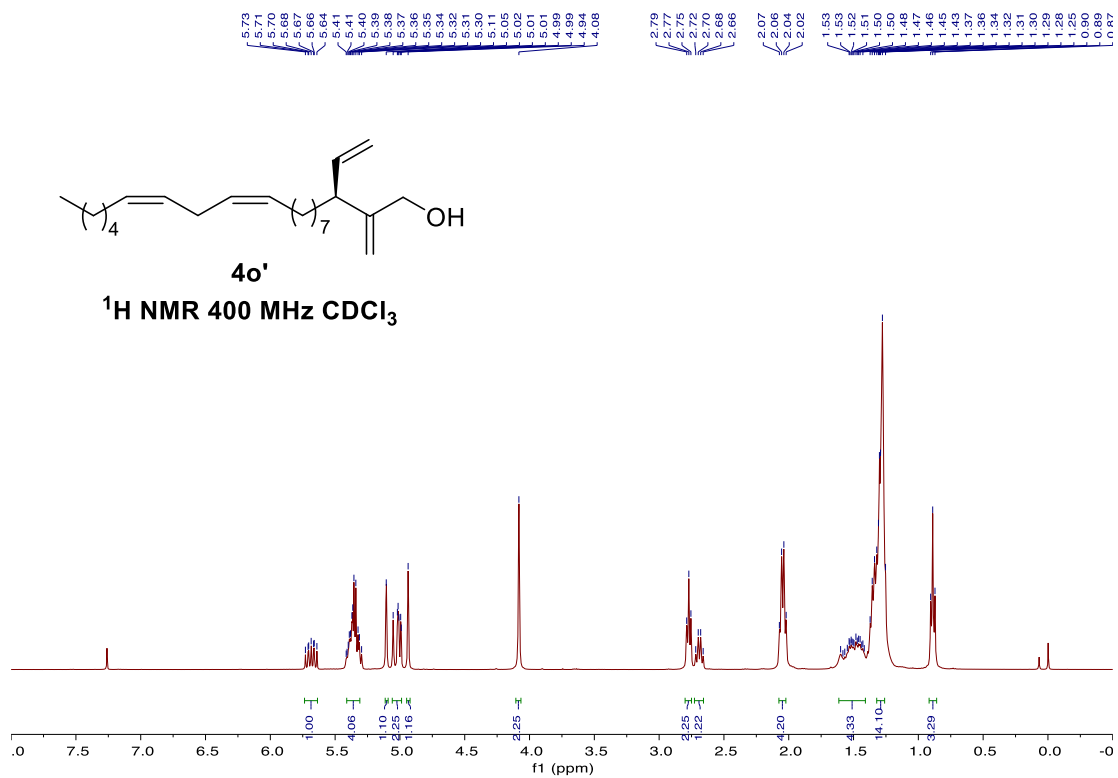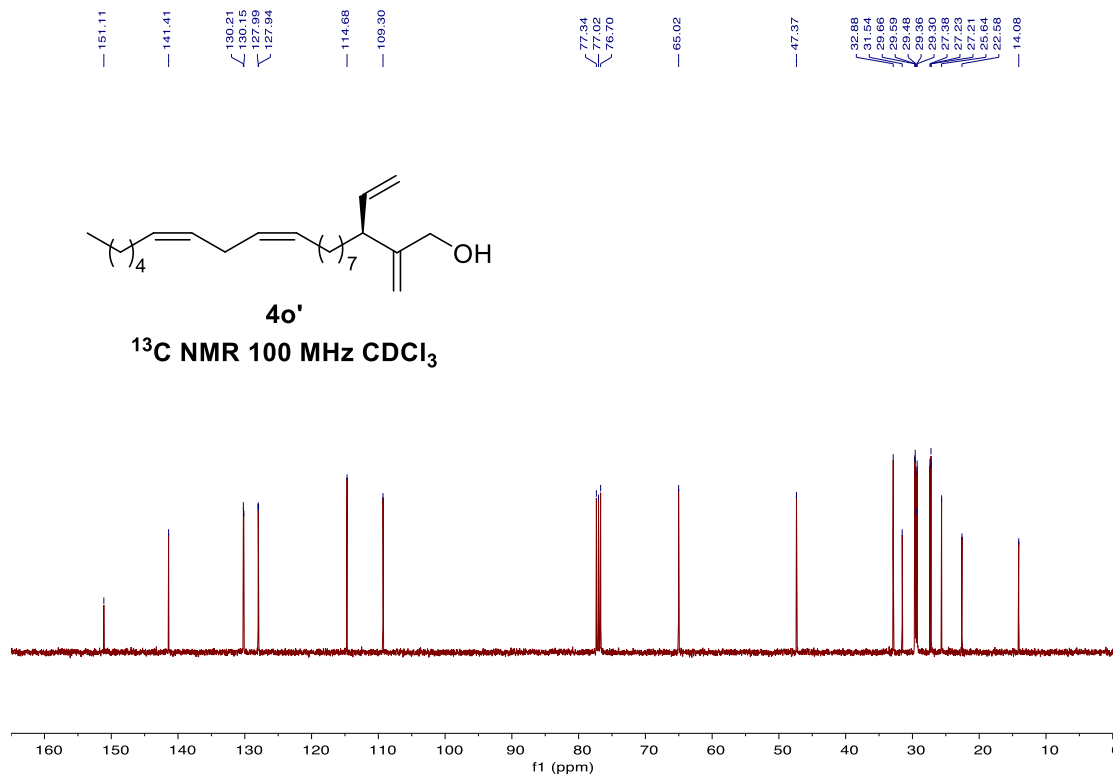



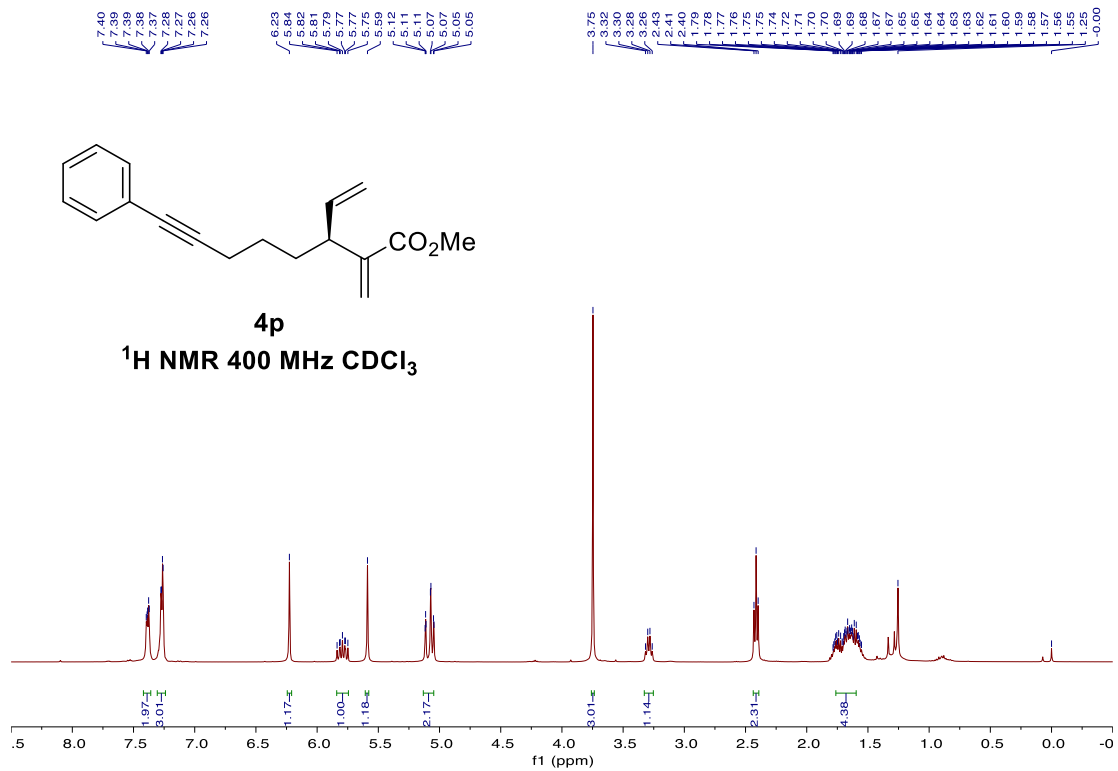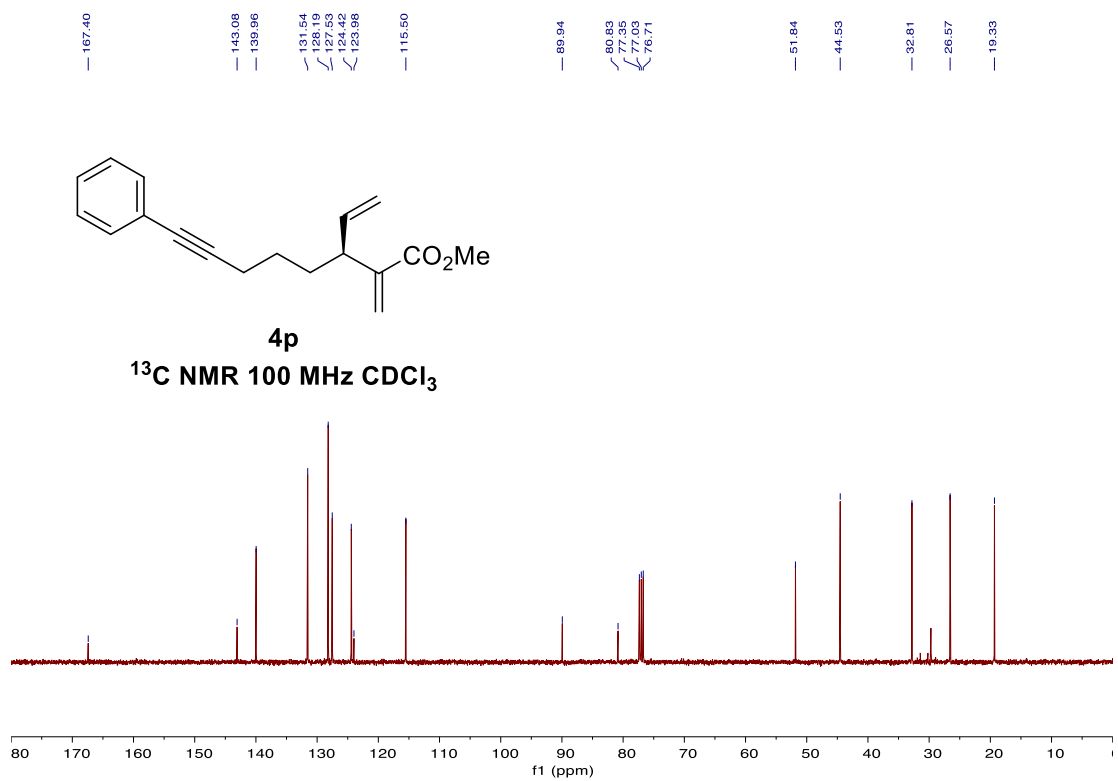

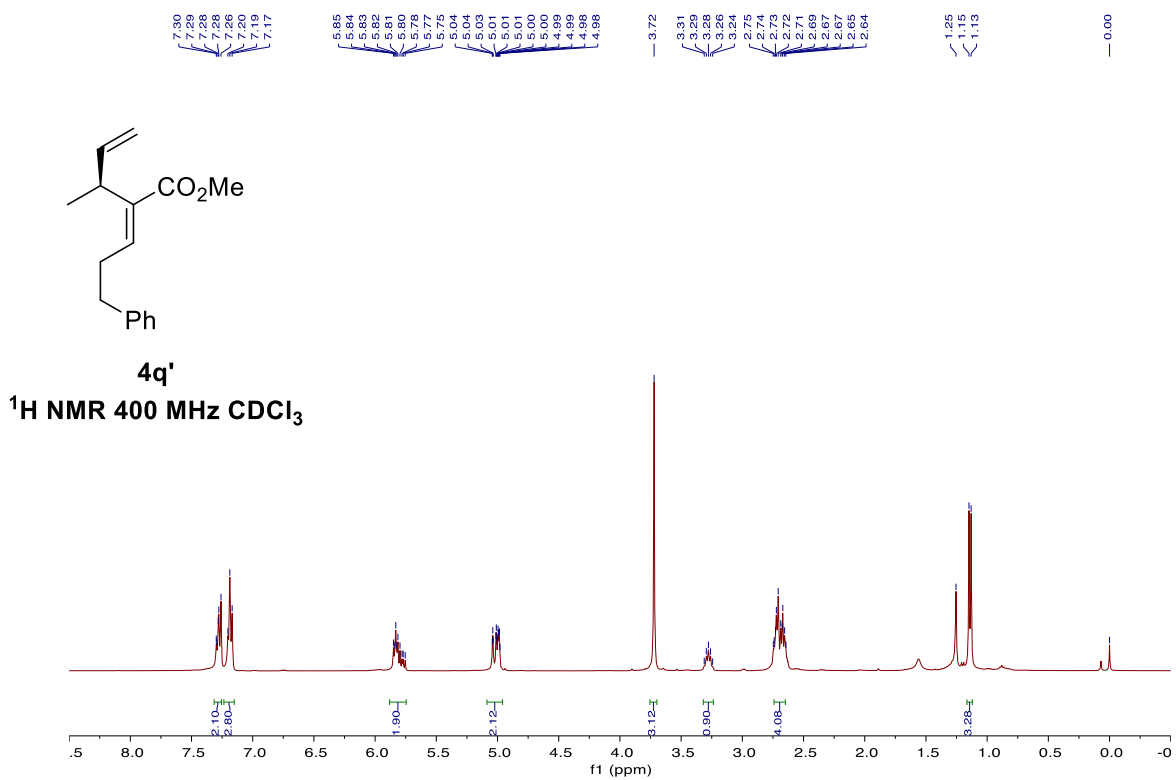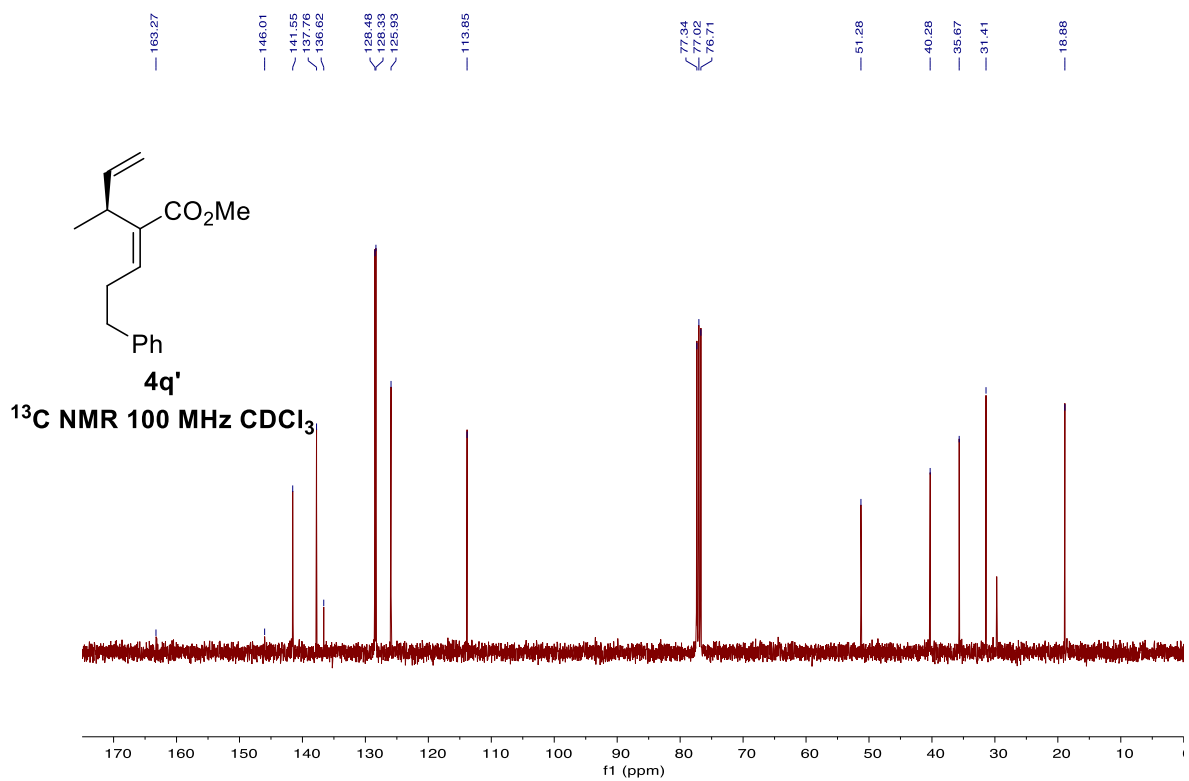

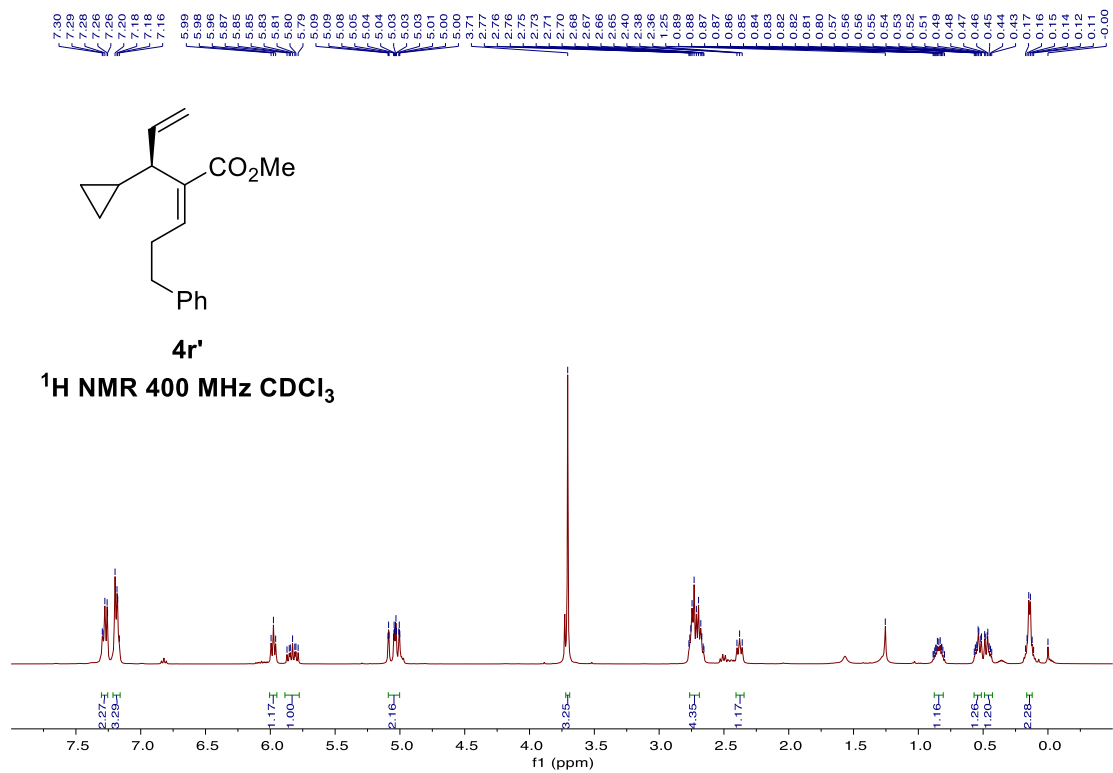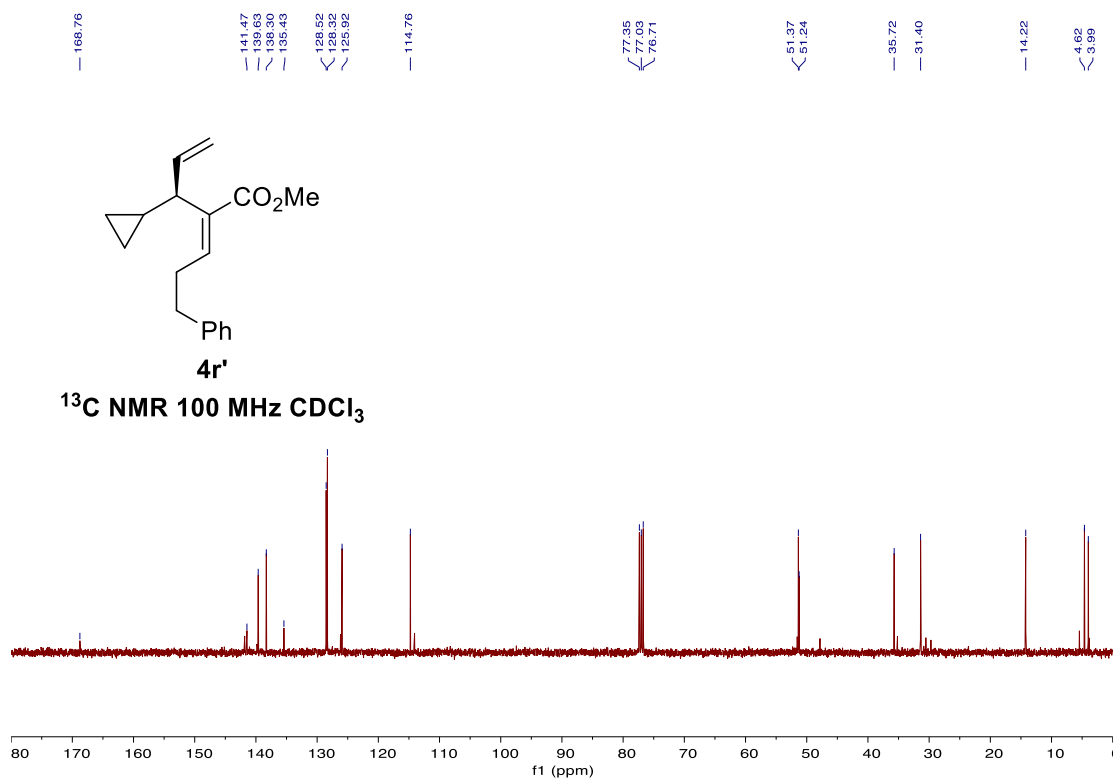

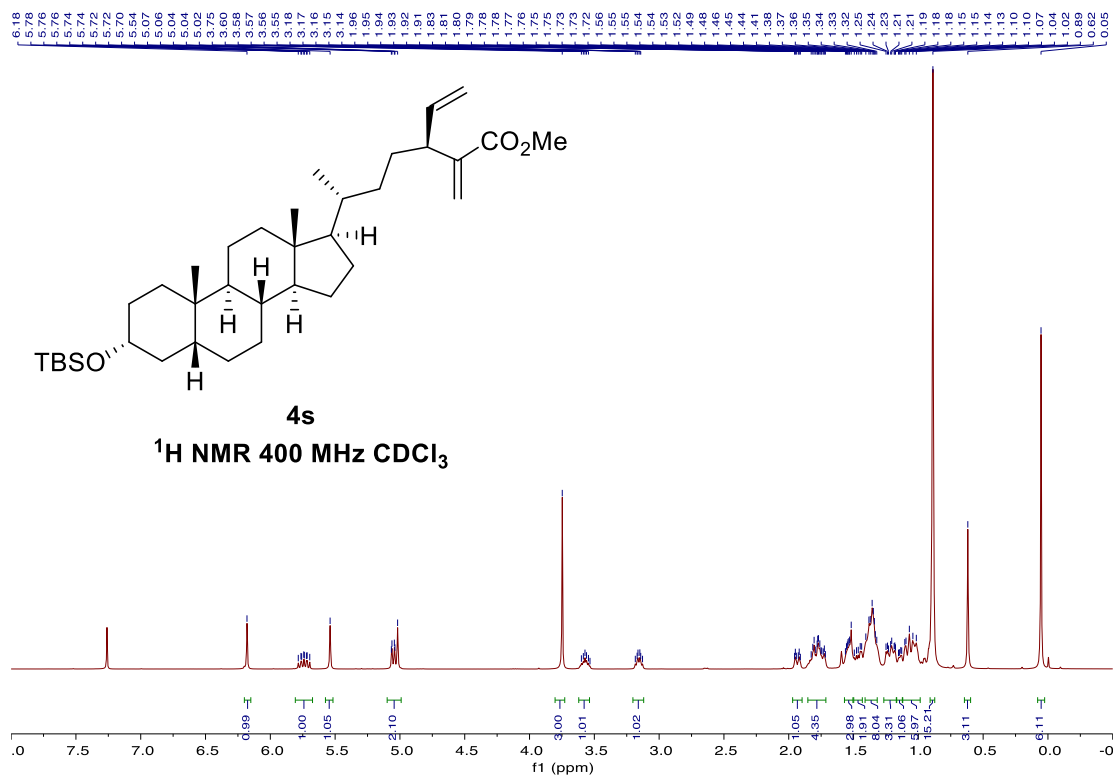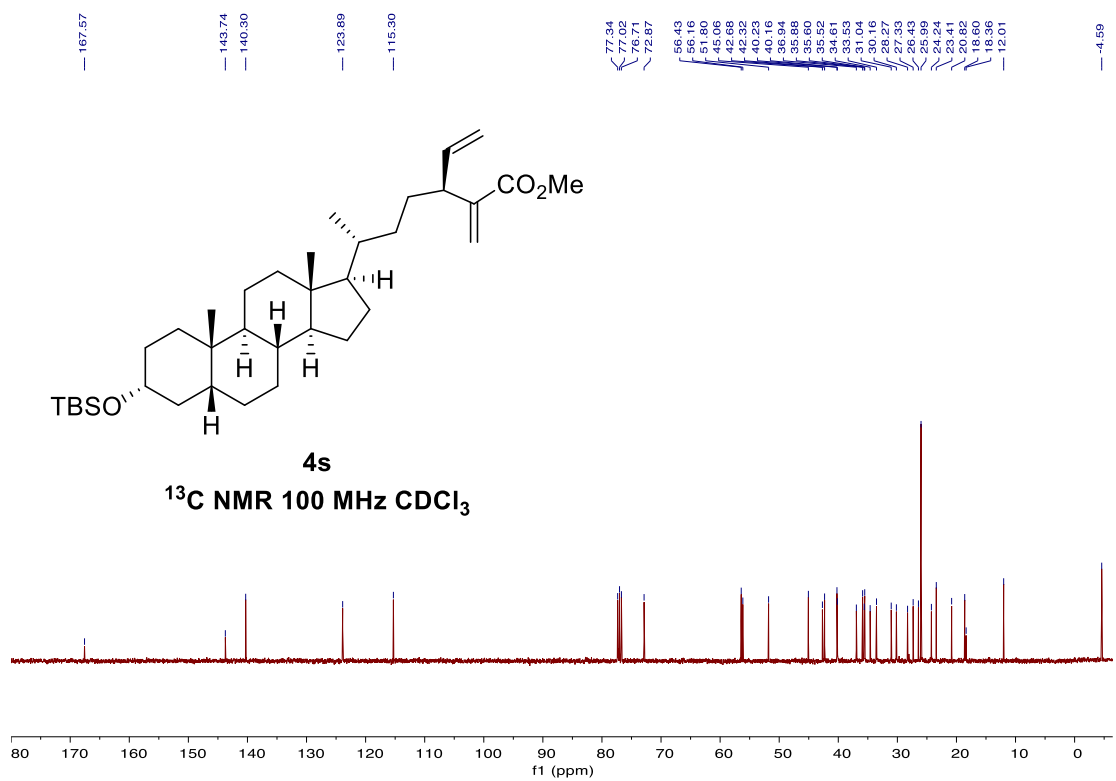

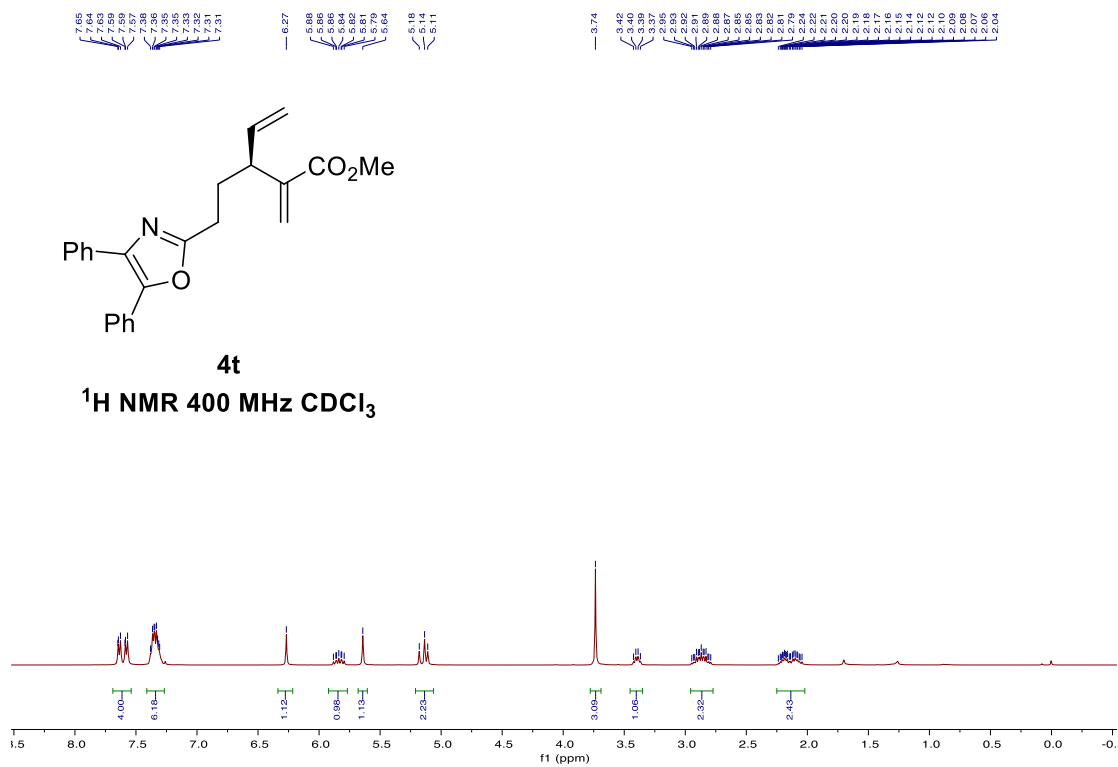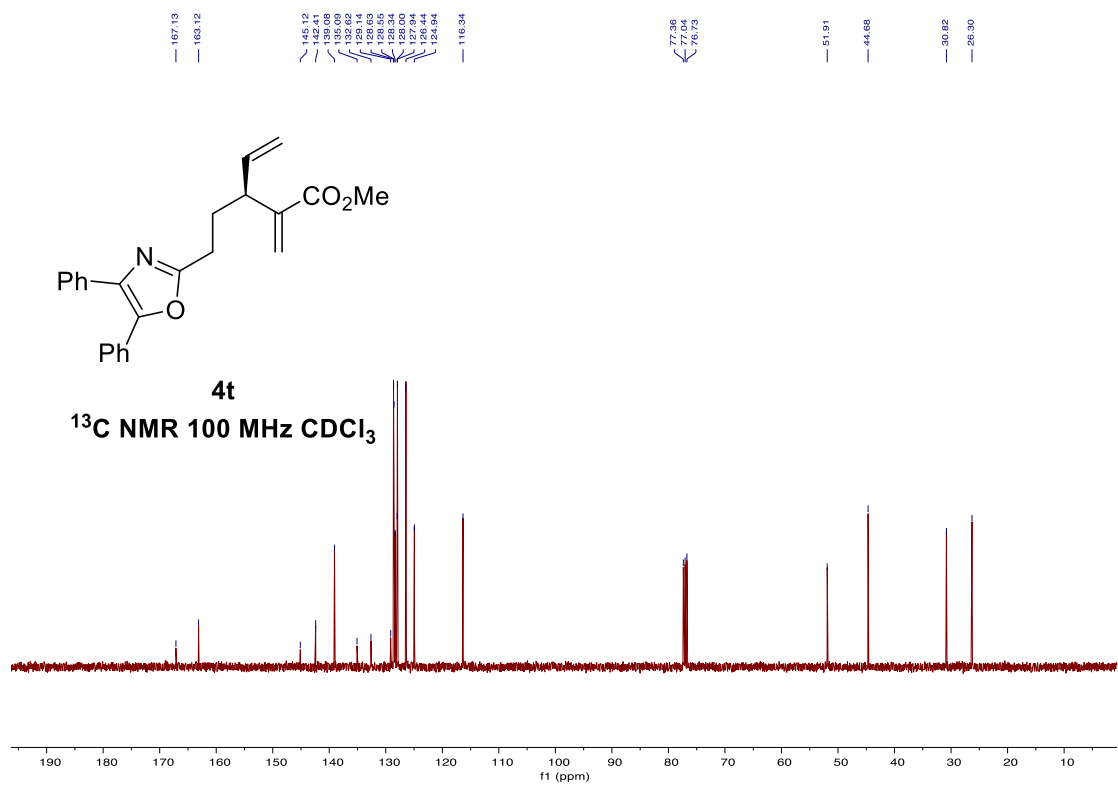



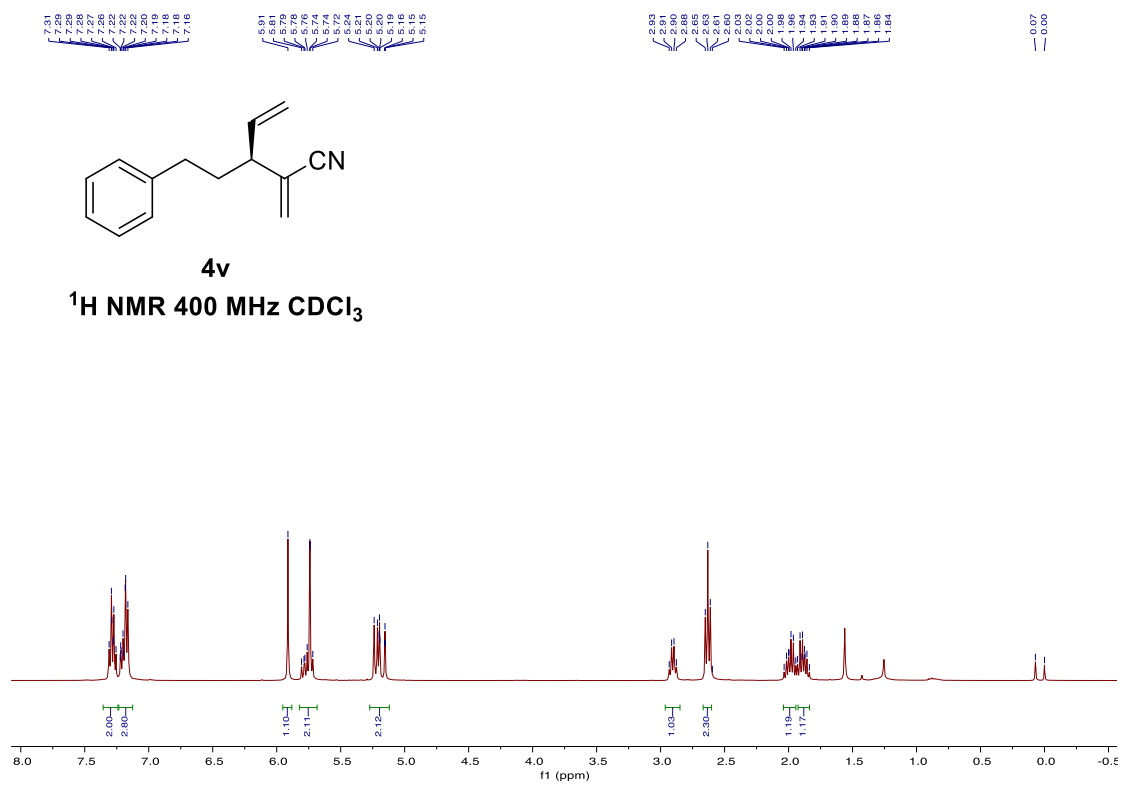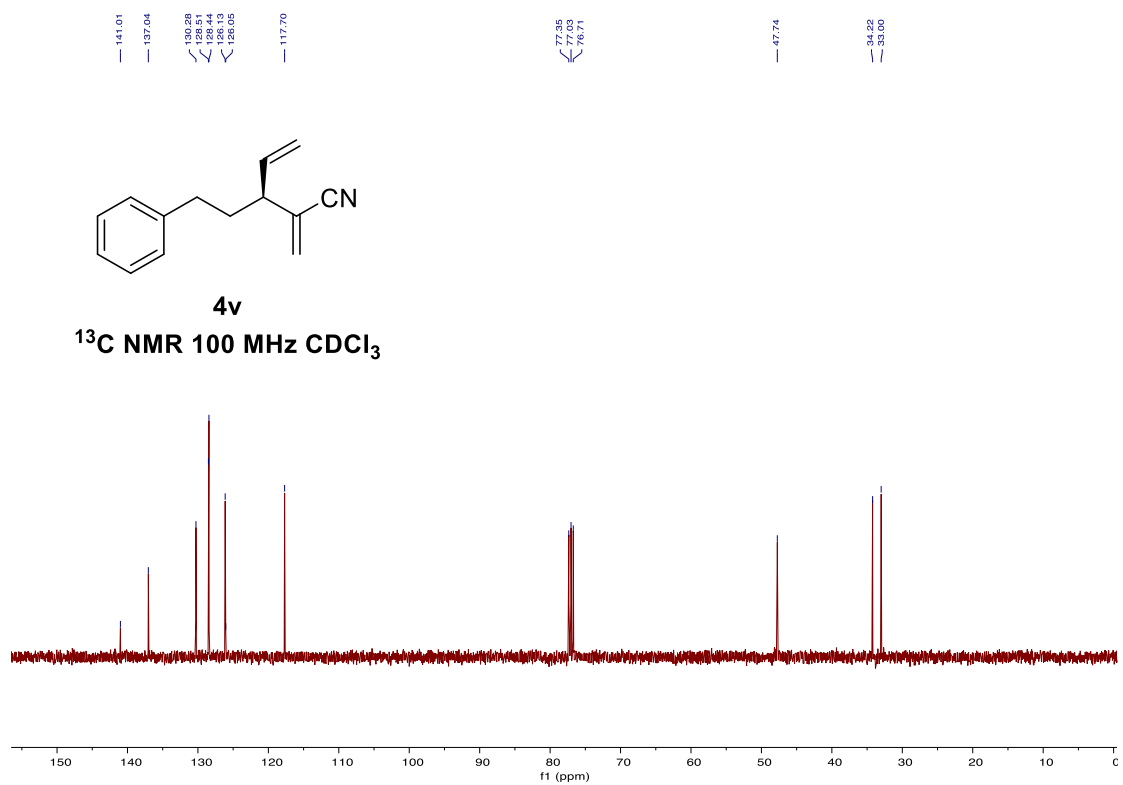

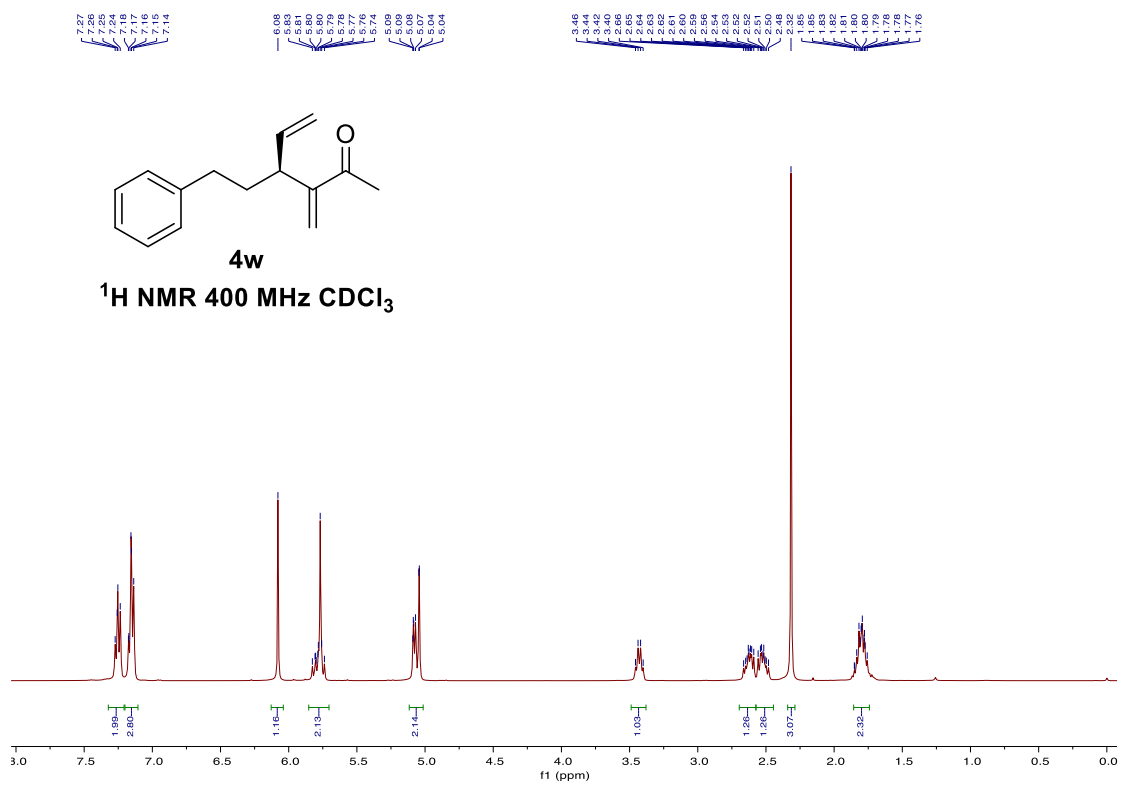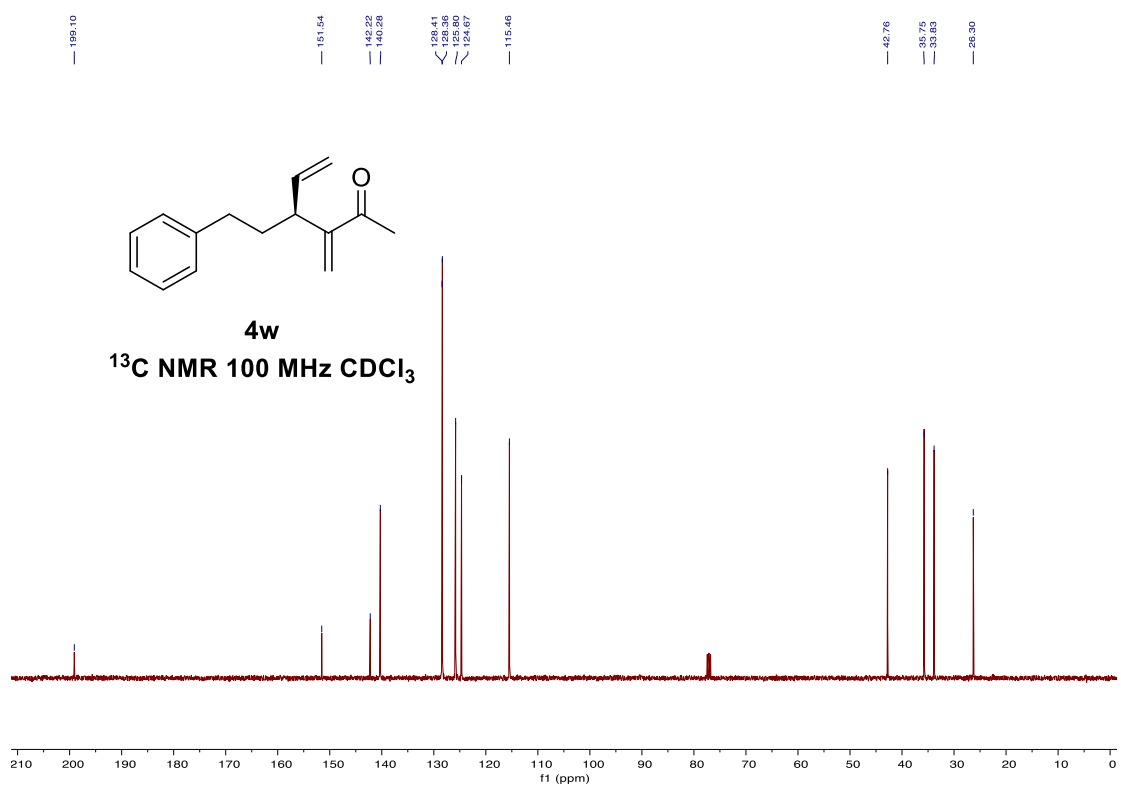



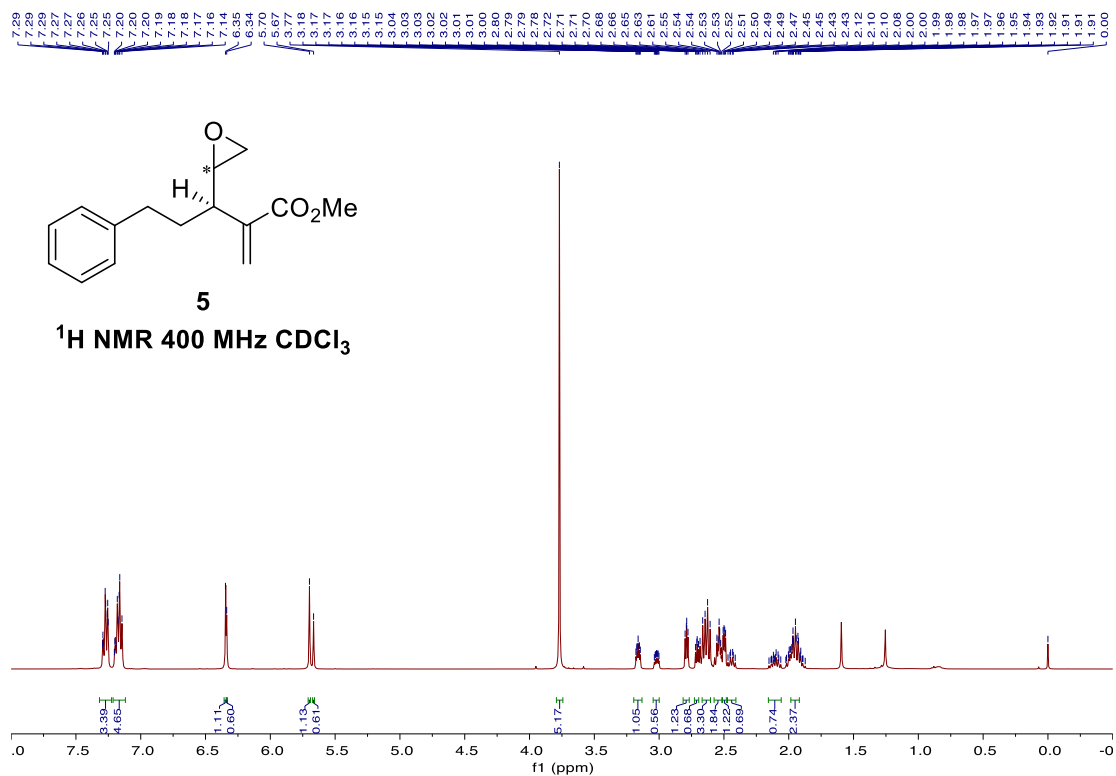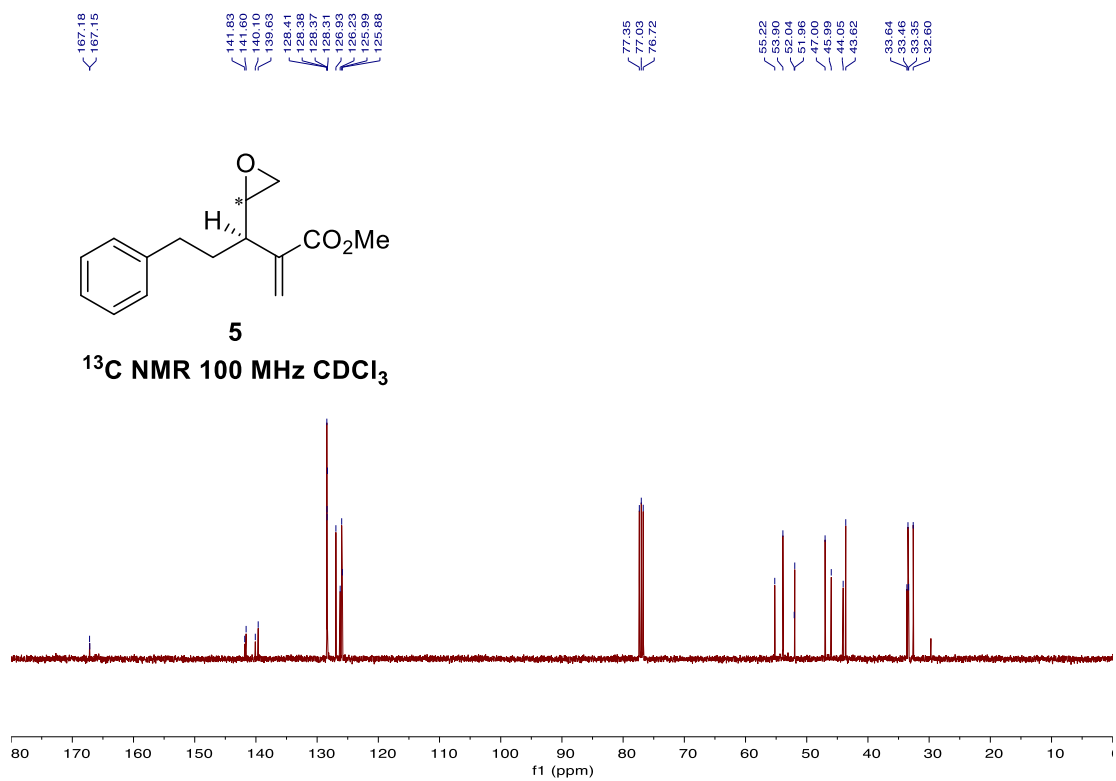

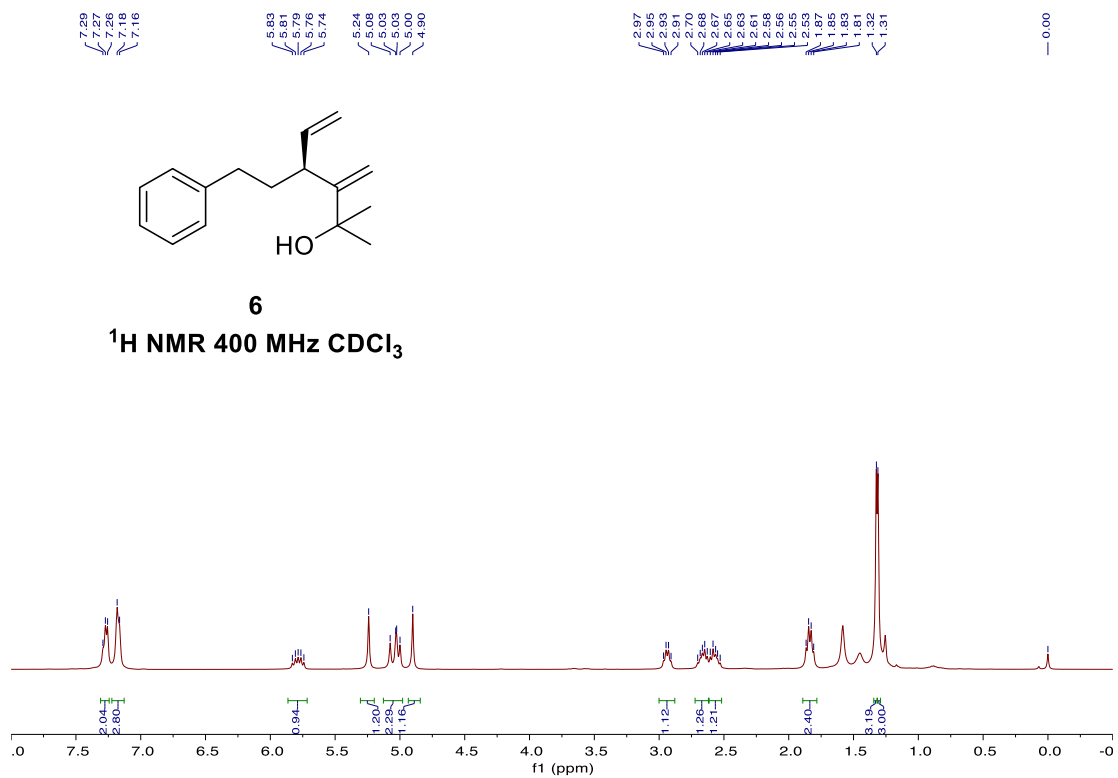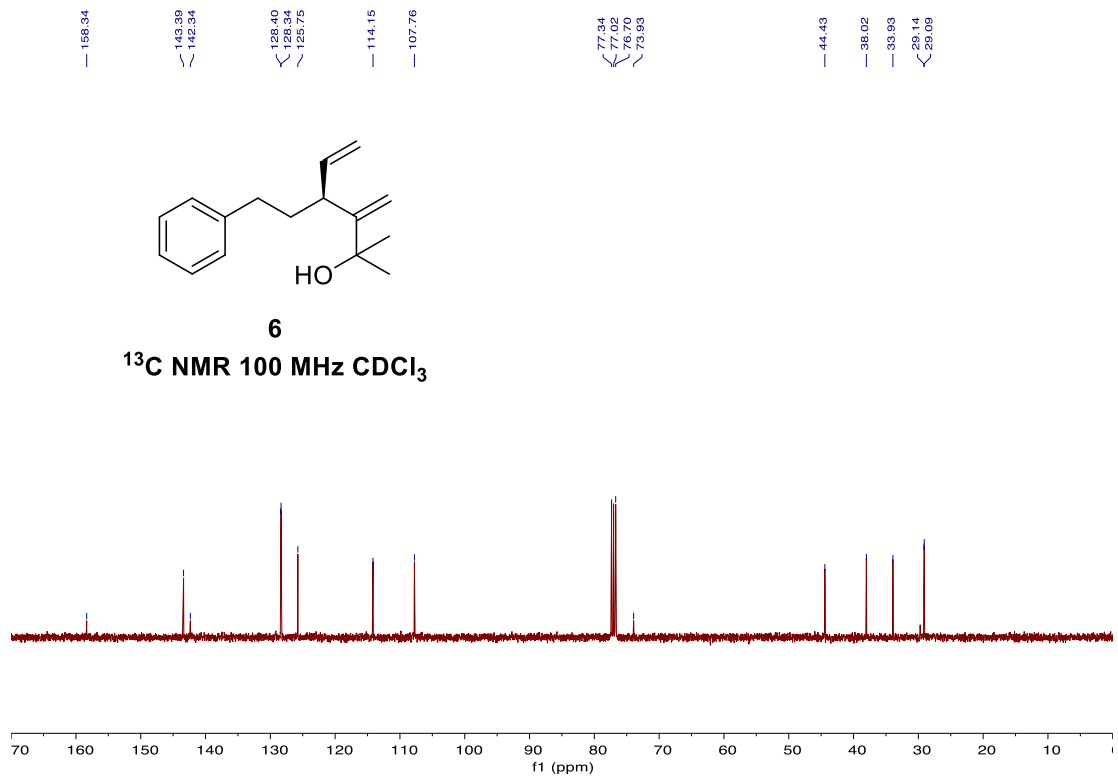

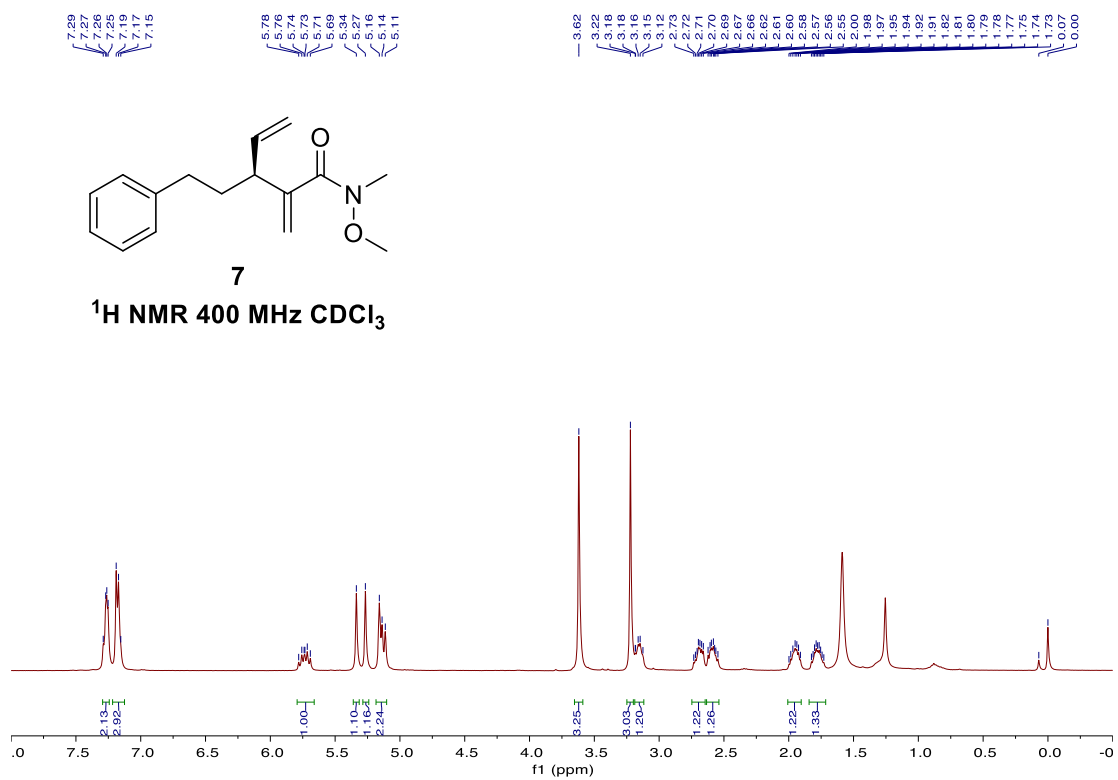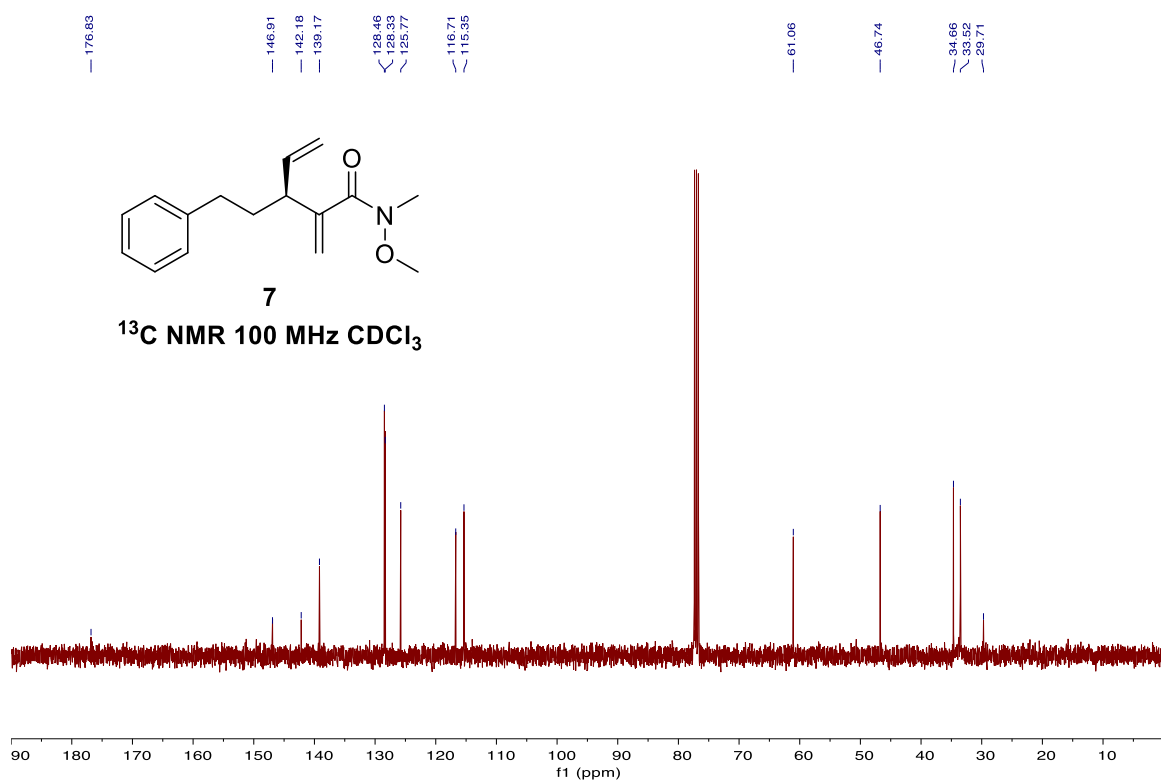

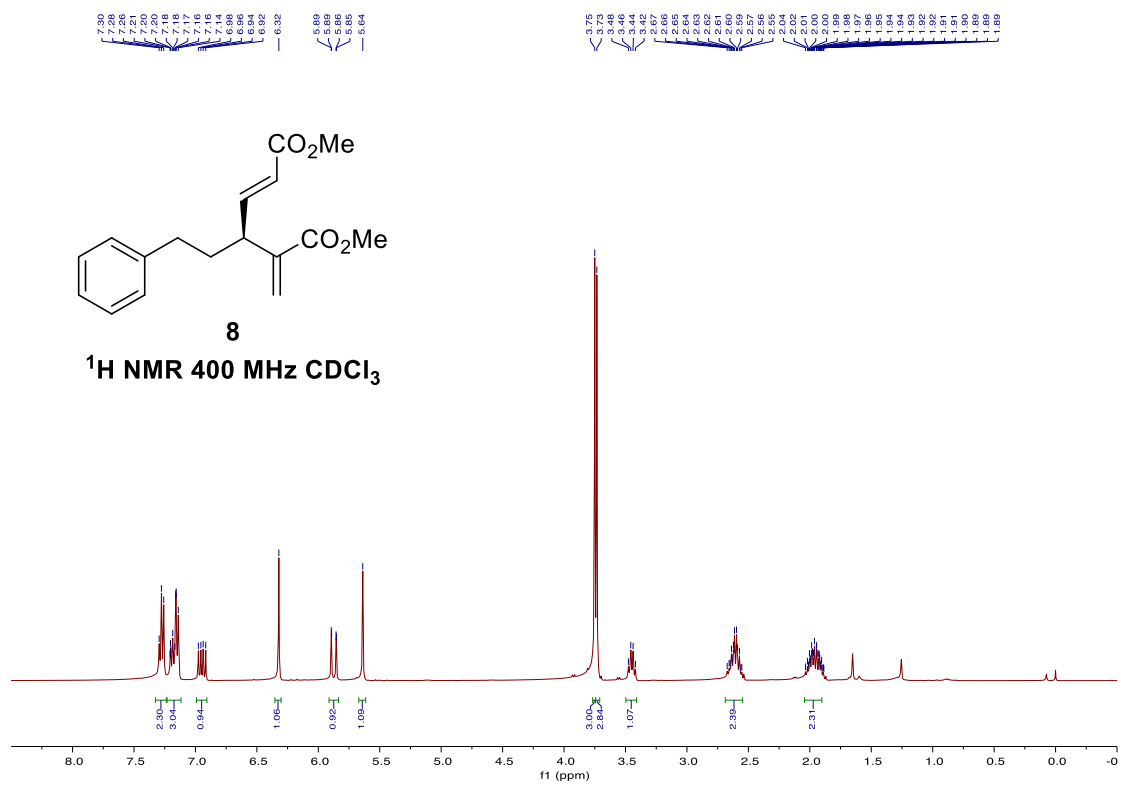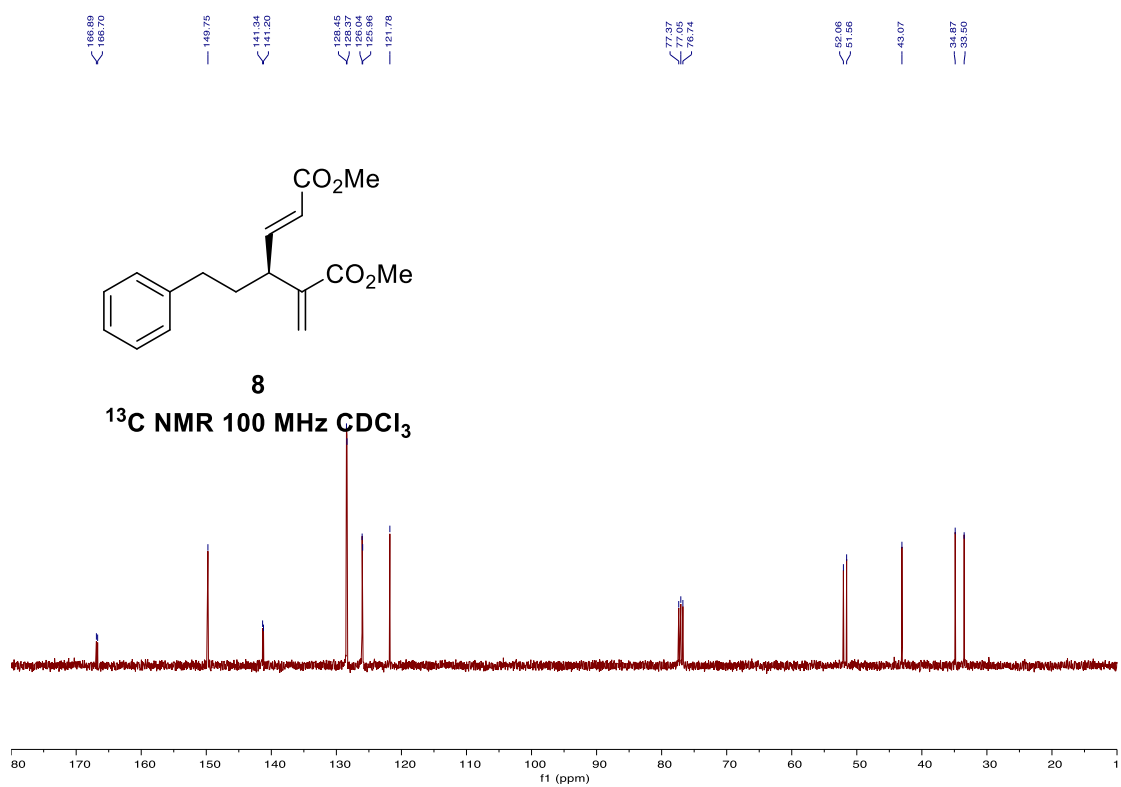

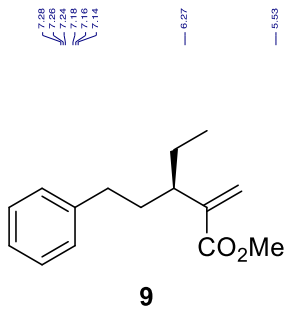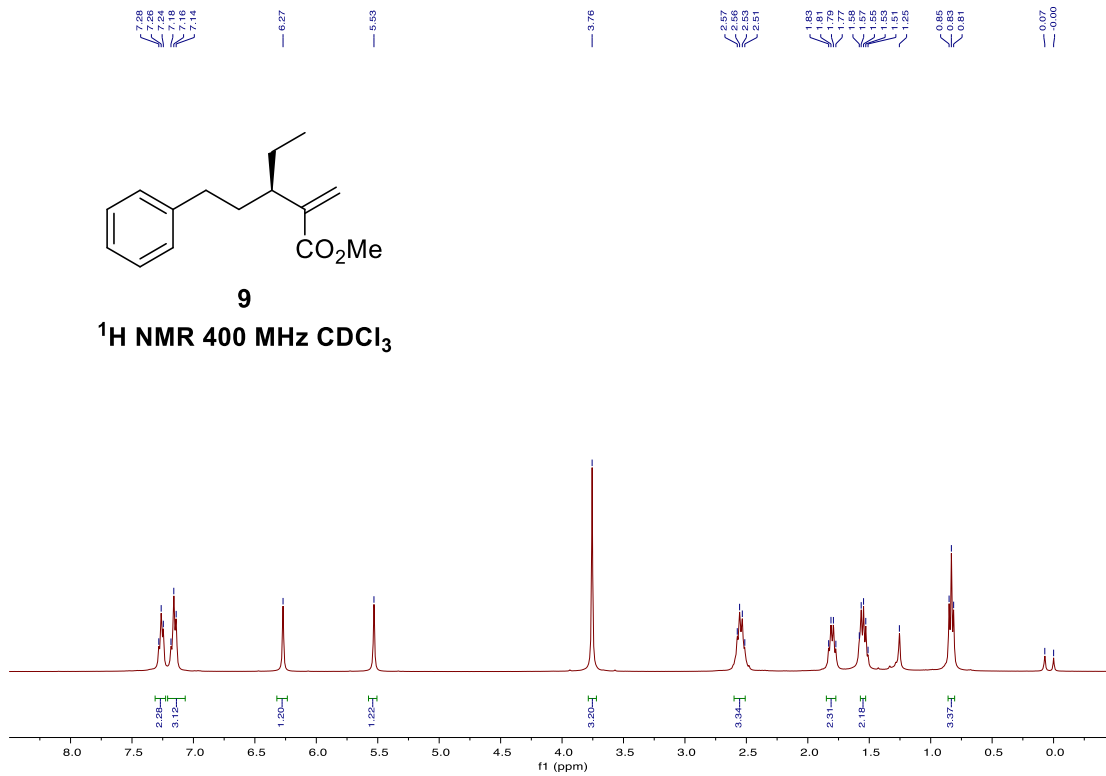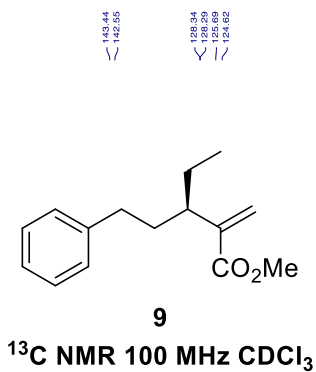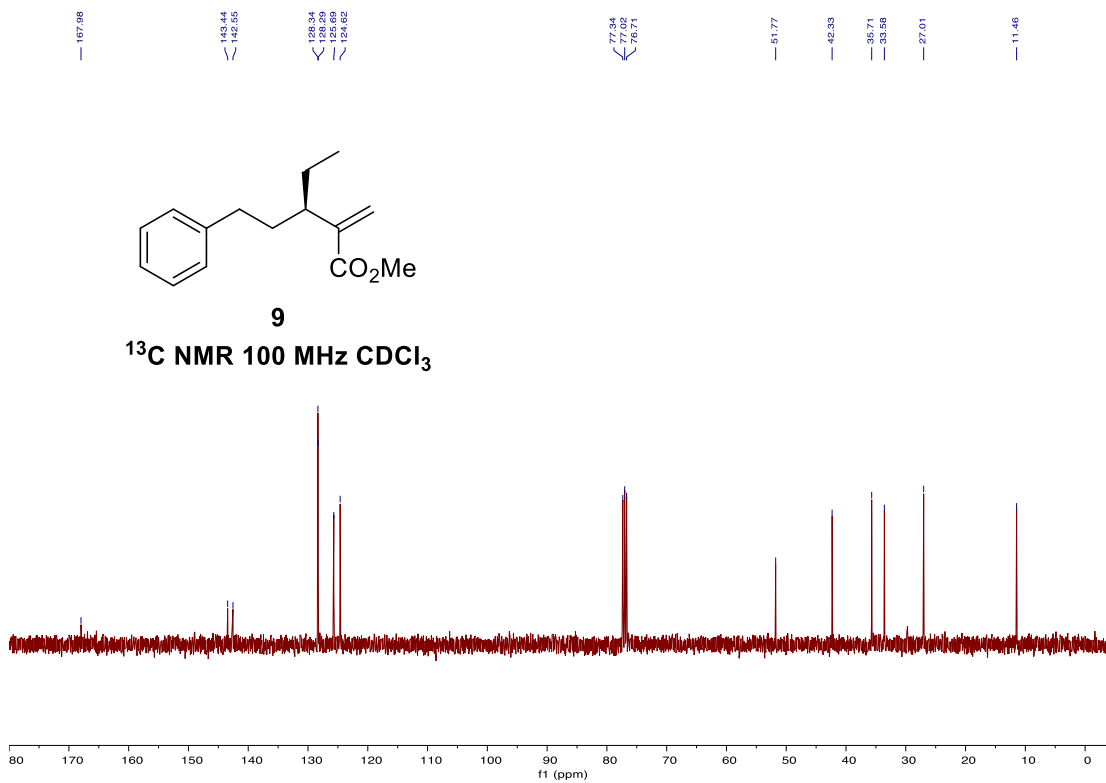

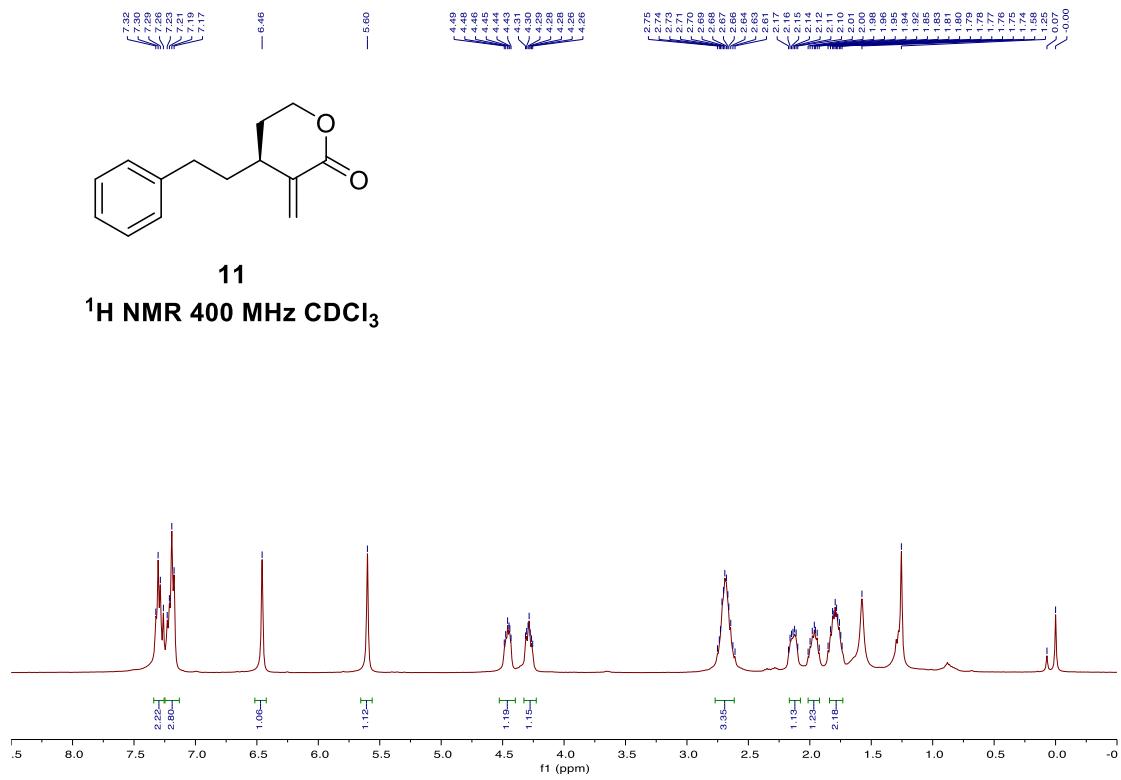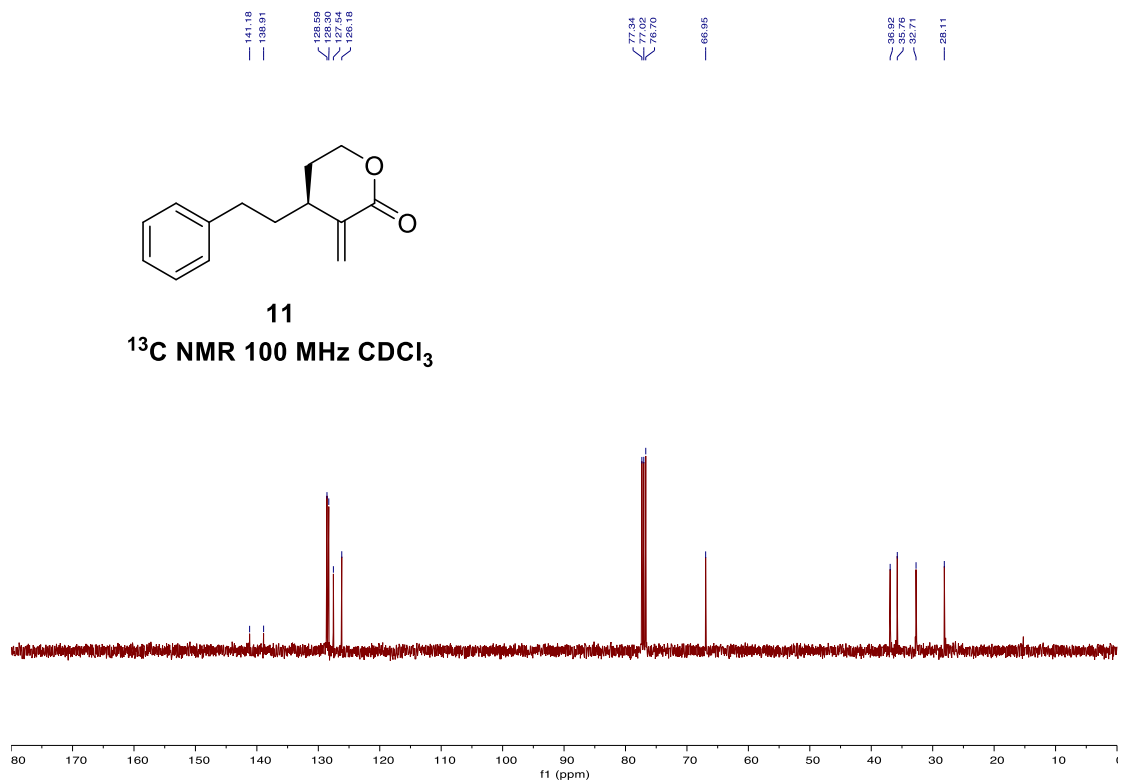

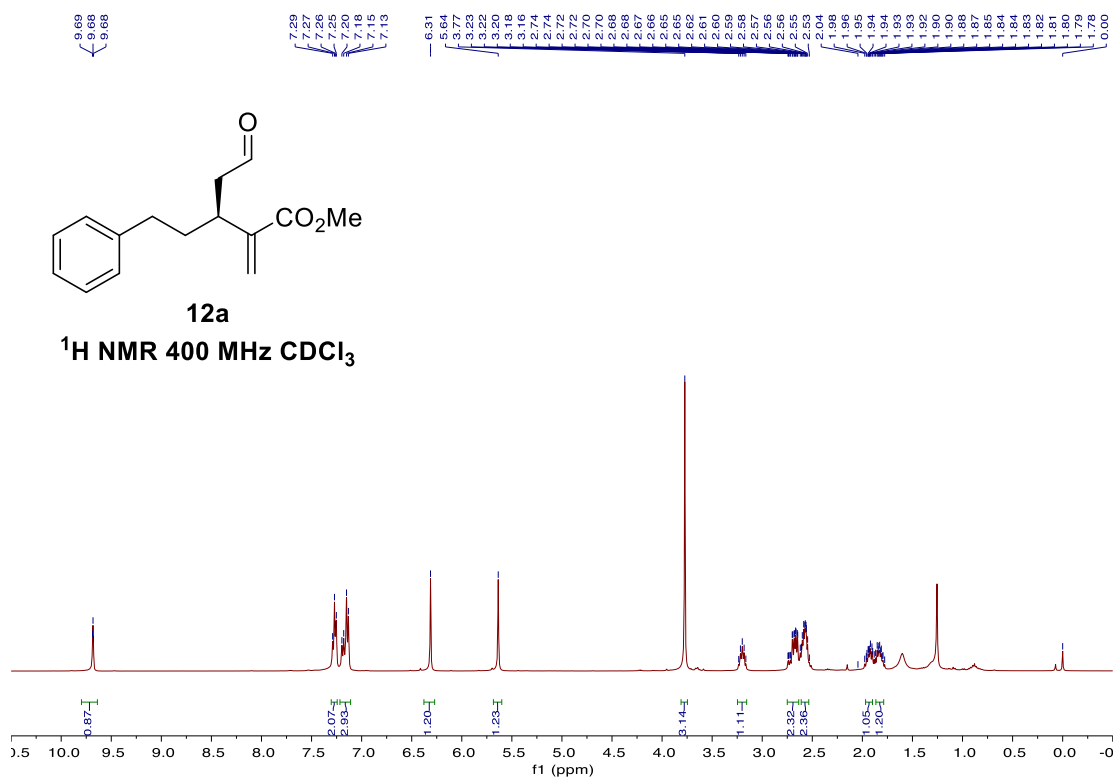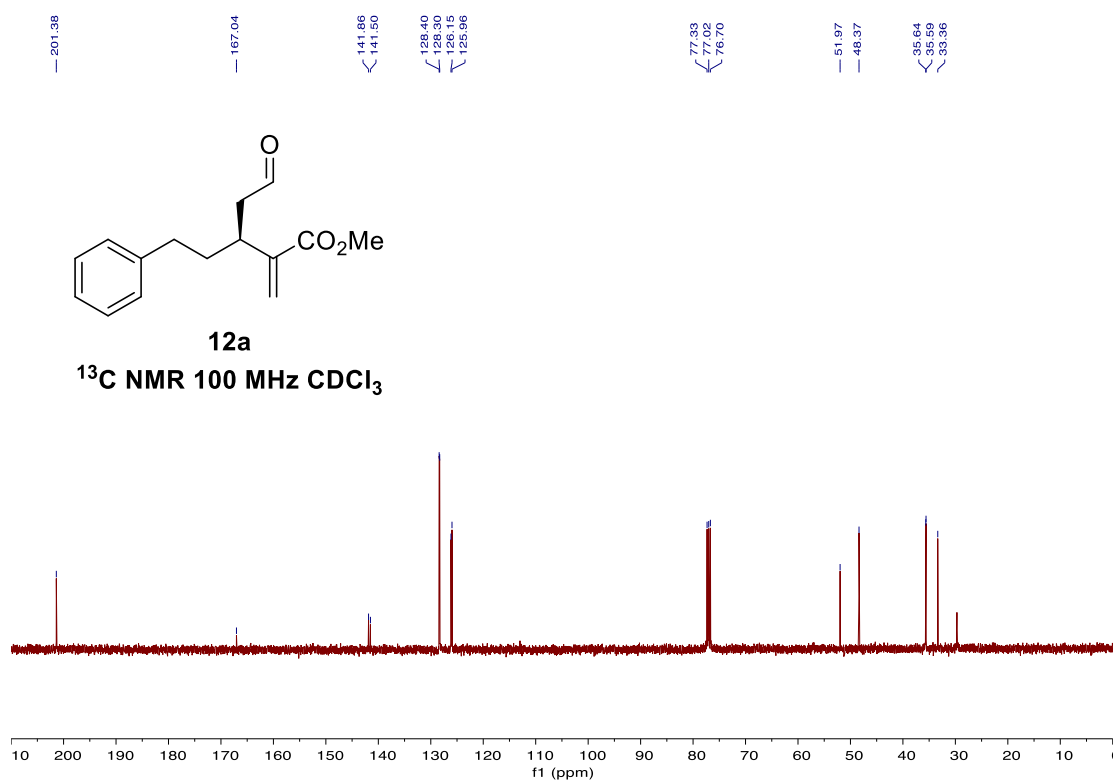

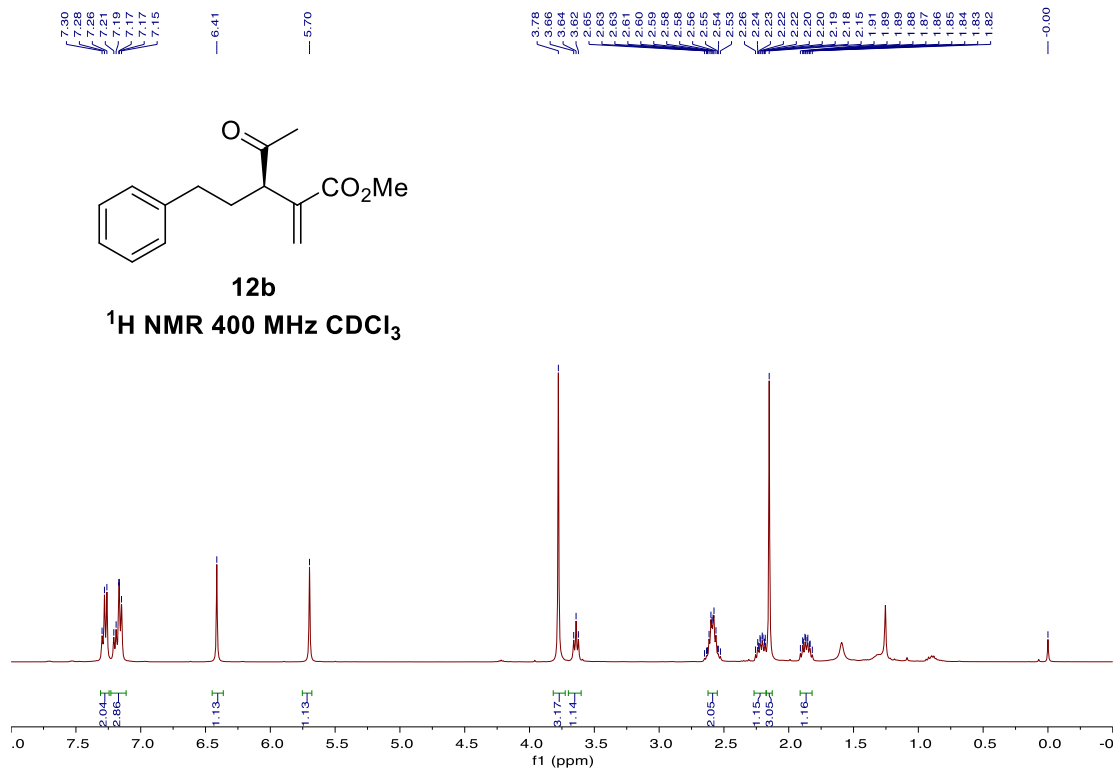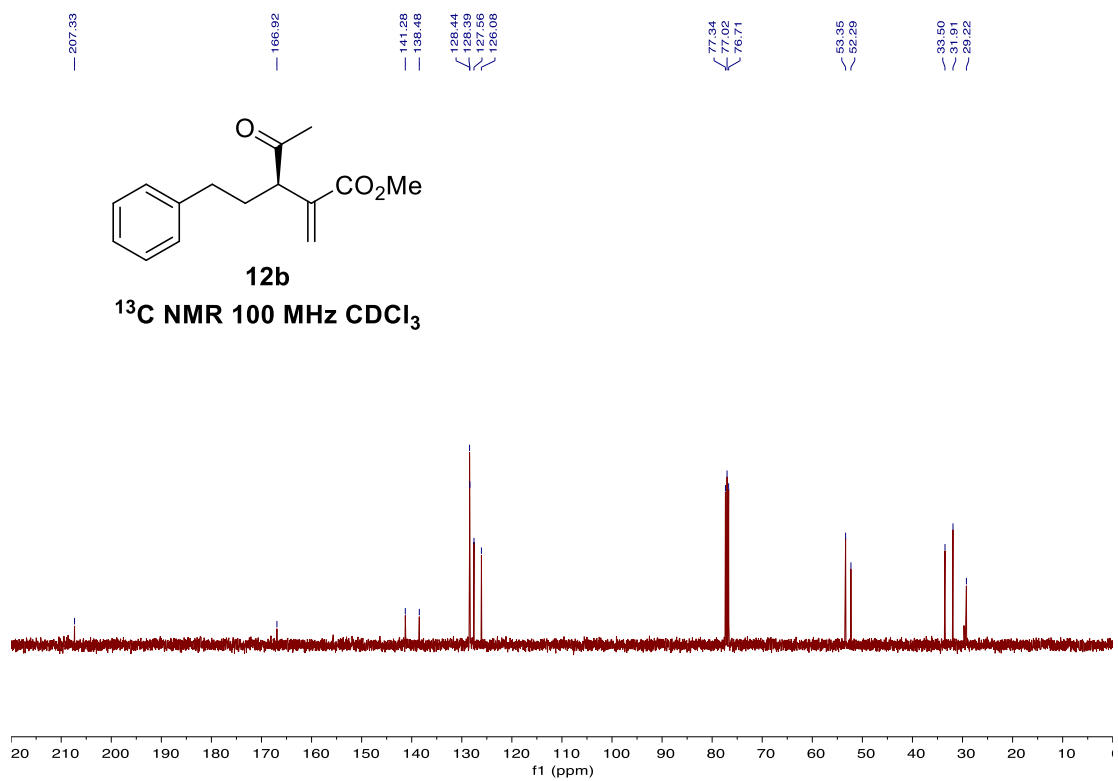



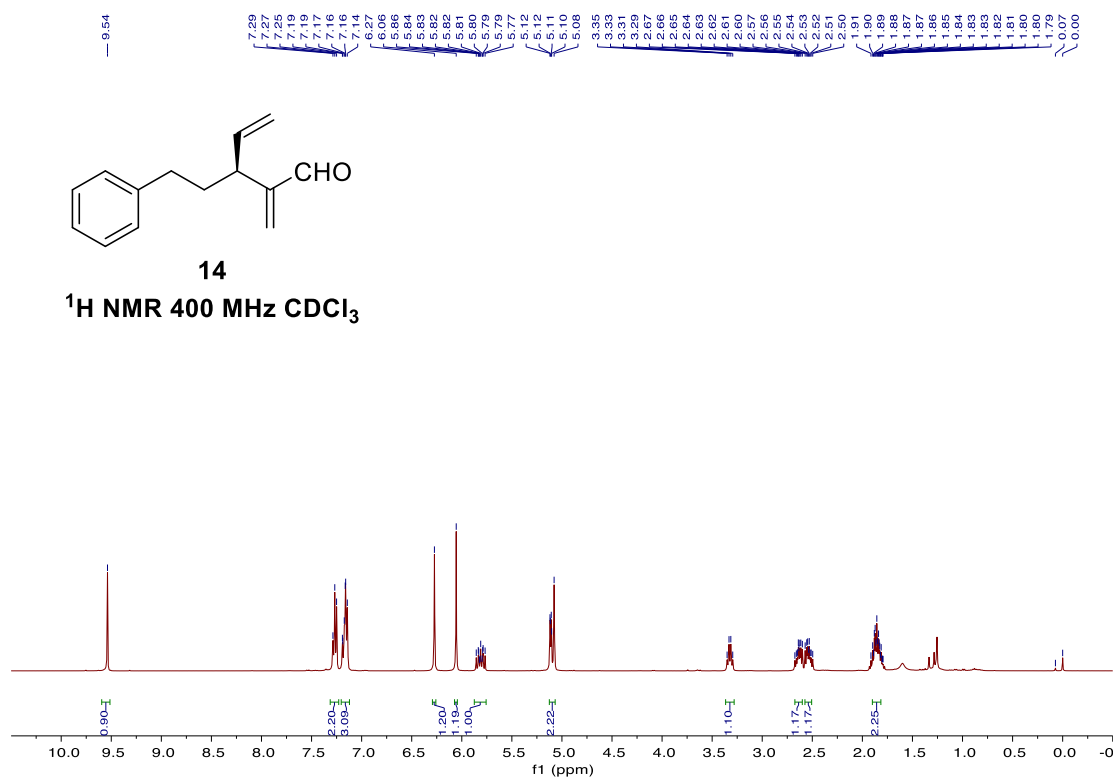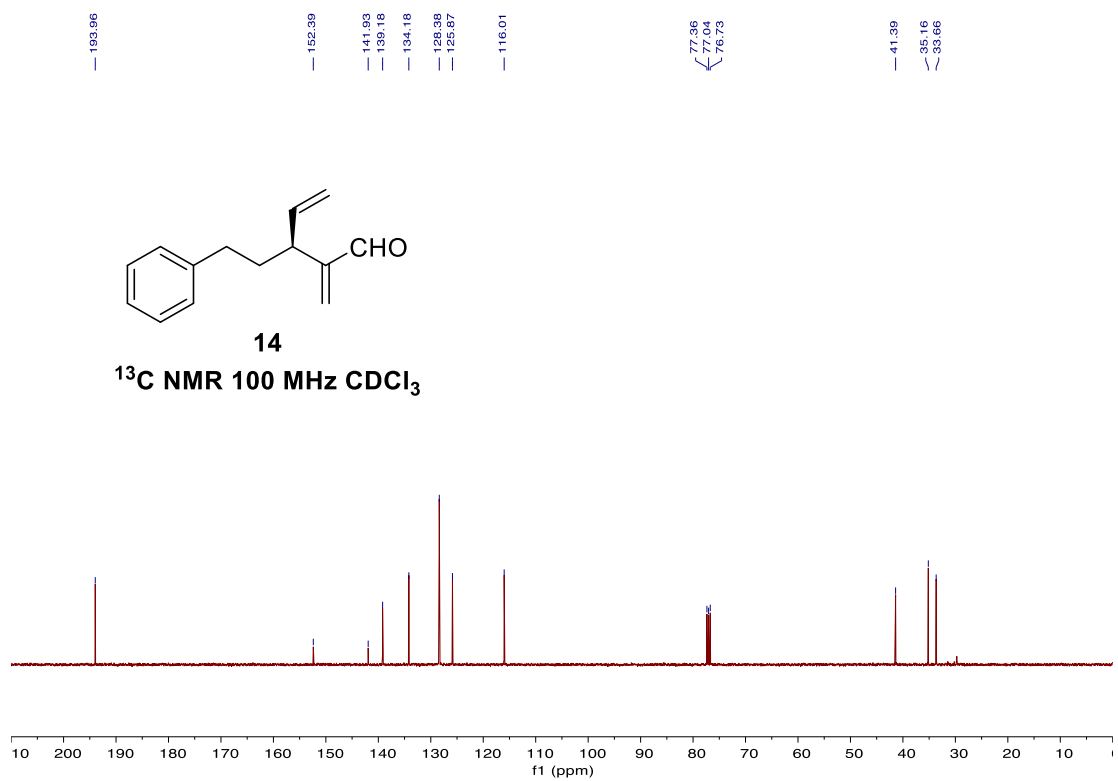

Supplement: d5cc00072f1.pdf [file d5cc00072f1.pdf]
